# Supplementary material for: Silver(i)-catalyzed oxidative coupling of hydrosilanes with DMF to symmetrical and unsymmetrical disiloxanes
Source: Royal Society of Chemistry journal article supplement (doi:10.1039/d1nj05617d), 2022-01-01

## SUPPORTING INFORMATION

### Silver(I)-Catalyzed Oxidative Coupling of Hydrosilanes with DMF to Symmetrical and Unsymmetrical Disiloxanes

Nan Wu,<sup>†a</sup> Chuang Li,<sup>†a</sup> Guichao Dong,<sup>†a</sup> Mengfei Jiang,<sup>a</sup> Zhou Xu<sup>\*a</sup>

<sup>a</sup>Jiangsu Key Laboratory of New Drug Research and Clinical Pharmacy, School of Pharmacy,  
Xuzhou Medical University, Tongshan Road 209, Xuzhou, 221004, China.

Corresponding author email: xuzhou@xzhmu.edu.cn

#### Table of Contents

|                                                                                        |   |
|----------------------------------------------------------------------------------------|---|
| I. General procedures .....                                                            | 2 |
| II. General procedures for oxidative coupling of hydrosilanes with DMF .....           | 2 |
| III. Characterization data of disiloxanes .....                                        | 3 |
| V. Copies of the <sup>1</sup> H, <sup>19</sup> F and <sup>13</sup> C NMR spectra ..... | 8 |

## I. General procedures

All reagents and solvents were purchased from commercial sources and used without further purification unless otherwise stated. All reactions were monitored by thin-layer chromatography (TLC). All reactions were carried out in air unless otherwise stated. Column chromatography was performed on silica gel (300-400 mesh, 20 gram, length of column is about 20 cm) and visualized with ultraviolet light. Ethyl acetate and petroleum ether were used as eluents.  $^1\text{H}$ ,  $^{13}\text{C}$  and  $^{19}\text{F}$  spectra were recorded at room temperature on a JEOL ECZ400 with TMS as an internal standard and  $\text{CDCl}_3$  as solvent. Fourier transform infrared spectra (FT-IR) were recorded on Agilent Technologies Cary 630 instrument. HRMS analyses were made by means of ESI-TOF. Melting points were measured on micro melting point apparatus and uncorrected.

## II. General procedures for oxidative coupling of hydrosilanes with DMF

1. Oxidative coupling of hydrosilanes with DMF to symmetrical disiloxanes.

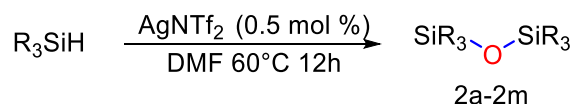

$\text{AgNTf}_2$  (0.0125 mmol, 0.0049 g, 0.005 eq), DMF (2.5 ml), hydrosilane (2.5 mmol) were mixed in a 10 mL reaction flask and the reaction was stirred at 60 °C. After the reaction was completed (monitored by TLC), the reaction was quenched with  $\text{H}_2\text{O}$  (5 mL) and extracted with DCM (2x10 mL). The combined organic layers were dried over  $\text{Na}_2\text{SO}_4$  and the solution was concentrated in vacuo. The disiloxane 2a was purified by flash chromatography (PE : EA = 100:1).

2. Synthesis of unsymmetrical disiloxanes.

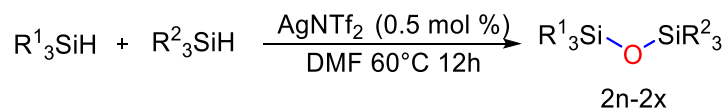

$\text{AgNTf}_2$  (0.0125 mmol, 0.0049 g, 0.005 eq), DMF (4 ml),  $\text{R}^1_3\text{SiH}$  (3 mmol),  $\text{R}^2_3\text{SiH}$  (1 mmol) were mixed in a 10 mL reaction flask and the reaction was stirred at 60 °C. After the reaction was completed, the reaction was quenched with  $\text{H}_2\text{O}$  (5 mL) and extracted with DCM (2 x 10 mL). The combined organic layers were dried over  $\text{Na}_2\text{SO}_4$ , and the solution was concentrated in vacuo. The crude disiloxane was purified by flash chromatography on silica (PE : EA = 100:1).

### III. Characterization data of dissiloxane

#### **2-1,1,3,3-tetramethyl-1,3-diphenyldisiloxane (2a)**<sup>1,2</sup>

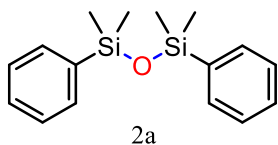

**2a** was obtained in 96% yield (343.4 mg) as a colorless liquid after silica gel column chromatography using PE/EtOAc (100:1). <sup>1</sup>H NMR (400 MHz, CDCl<sub>3</sub>): δ 7.55 (dd, *J* = 7.1, 2.1 Hz, 4H), 7.42-7.31 (m, 6H), 0.33 (s, 12H).

<sup>13</sup>C NMR (100 MHz, CDCl<sub>3</sub>): δ 139.80, 132.98, 129.23, 127.68, 0.84. <sup>29</sup>Si NMR (79 MHz, CDCl<sub>3</sub>): δ -0.52. HRMS (ESI-TOF) *m/z*: [M+Na]<sup>+</sup> calcd. for C<sub>16</sub>H<sub>22</sub>OSi<sub>2</sub>Na<sup>+</sup> 309.1101; found: 309.1102.

#### **3-1,3-dimethyl-1,1,3,3-tetraphenyldisiloxane (2b)**<sup>1</sup>

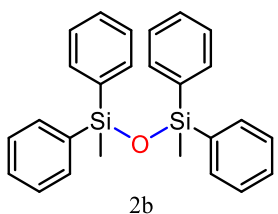

**2b** was obtained in 90% yield (512.7 mg) as a colorless liquid after silica gel column chromatography using PE/EtOAc (100:1). <sup>1</sup>H NMR (400 MHz, CDCl<sub>3</sub>): δ 7.55-7.49 (m, 8H), 7.41-7.34 (m, 4H), 7.34-7.28 (m, 8H), 0.57 (s, 6H). <sup>13</sup>C NMR (100 MHz, CDCl<sub>3</sub>): δ 137.57, 133.99, 129.55, 127.71, -0.59.

<sup>29</sup>Si NMR (79 MHz, CDCl<sub>3</sub>): δ -9.38. HRMS (ESI-TOF) *m/z*: [M+Na]<sup>+</sup>

calcd. for C<sub>16</sub>H<sub>26</sub>OSi<sub>2</sub>Na<sup>+</sup> 433.1414; found: 433.1416.

#### **1,1,1,3,3,3-hexaphenyldisiloxane (2c)**<sup>2,3</sup>

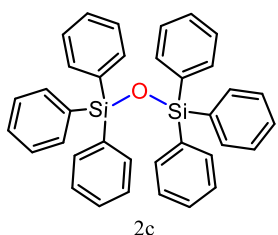

**2c** was obtained in 91% yield (608.3 mg) as a white solid (m.p. 221-223 °C) after silica gel column chromatography using PE/EtOAc (50:1). <sup>1</sup>H NMR (400 MHz, CDCl<sub>3</sub>): δ 7.48- 7.46 (m, 10H), 7.39-7.35 (m, 5H), 7.28-7.24 (m, 15H). <sup>13</sup>C NMR (100 MHz, CDCl<sub>3</sub>): δ 135.44, 135.12, 129.77, 127.68. <sup>29</sup>Si NMR (79 MHz, CDCl<sub>3</sub>): δ -17.50.

#### **1,1,1,3,3,3-hexabenzylidisiloxane (2d)**

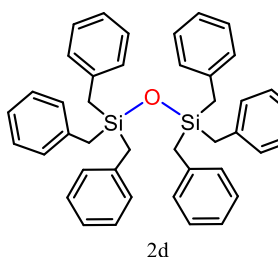

**2d** was obtained in 85% yield (657.6 mg) as a white solid (m.p. 206-208°C) after silica gel column chromatography using PE/EtOAc (50:1). <sup>1</sup>H NMR (400 MHz, CDCl<sub>3</sub>): δ 7.11 (t, *J* = 7.3 Hz, 12H), 7.05 (t, *J* = 7.1 Hz, 6H), 6.31 (d, *J* = 6.9 Hz, 12H), 1.95 (s, 12H). <sup>13</sup>C NMR (100 MHz, CDCl<sub>3</sub>): δ 138.19, 128.75, 128.29, 124.62, 24.67. <sup>29</sup>Si NMR (79 MHz, CDCl<sub>3</sub>): δ -3.22. HRMS (ESI-TOF) *m/z*: [M+Na]<sup>+</sup> calcd. for

C<sub>42</sub>H<sub>42</sub>OSi<sub>2</sub>Na<sup>+</sup> 641.2672; found: 641.2674.

#### **1,3-dibenzyl-1,1,3,3-tetramethyldisiloxane(2e)**<sup>2</sup>

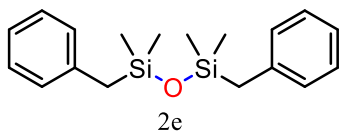

**2e** was obtained in 91% yield (357.8 mg) as a colorless liquid after silica gel column chromatography using PE/EtOAc (100:1). <sup>1</sup>H NMR (400 MHz, CDCl<sub>3</sub>): δ 7.20 (t, *J* = 7.5 Hz, 4H), 7.07 (t, *J* = 7.5 Hz, 2H),

6.98 (d, *J* = 6.9 Hz, 4H), 2.05 (s, 4H), -0.02 (s, 12H). <sup>13</sup>C NMR (100 MHz, CDCl<sub>3</sub>): δ 139.38,

128.31, 128.11, 124.01, 28.50, -0.11.  $^{29}\text{Si}$  NMR (79 MHz,  $\text{CDCl}_3$ ):  $\delta$  5.57. HRMS (ESI-TOF)  $m/z$ :  $[\text{M}+\text{Na}]^+$  calcd. for  $\text{C}_{18}\text{H}_{26}\text{OSi}_2\text{Na}^+$  337.1414; found: 337.1412.

### 1,3-bis(3,5-bis(trifluoromethyl)phenyl)-1,1,3,3-tetramethyldisiloxane (2f)

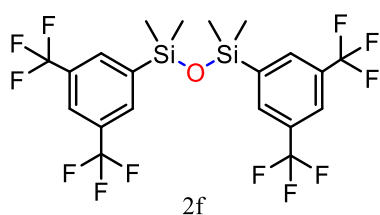

**2f** was obtained in 88% yield (613.8 mg) as a colorless liquid after silica gel column chromatography using PE/EtOAc (50:1).  $^1\text{H}$  NMR (400 MHz,  $\text{CDCl}_3$ ):  $\delta$  7.87 (s, 6H), 0.43 (s, 12H).  $^{13}\text{C}$  NMR (100 MHz,  $\text{CDCl}_3$ ):  $\delta$  142.27, 132.59, 130.98 (q,  $J = 32.6$  Hz), 123.45 (q,  $J = 273.1$  Hz), 123.36, 0.53;  $^{19}\text{F}$  NMR (400 MHz,  $\text{CDCl}_3$ ): -62.92.

$^{29}\text{Si}$  NMR (79 MHz,  $\text{CDCl}_3$ ):  $\delta$  0.72. HRMS (ESI-TOF)  $m/z$ :  $[\text{M}+\text{F}]^-$  calcd. for  $\text{C}_{20}\text{H}_{18}\text{F}_{12}\text{OSi}_2\text{F}^-$  577.0694; found: 577.0685.

### 1,1,1,3,3,3-hexaethylidisiloxane (2g)<sup>2,3</sup>

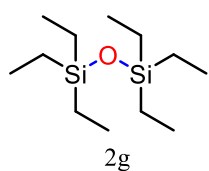

**2g** was obtained in 67% yield (206 mg) as a colorless liquid after silica gel column chromatography using PE/EtOAc (100:1).  $^1\text{H}$  NMR (400 MHz,  $\text{CDCl}_3$ ):  $\delta$  0.93 (t,  $J = 16$  Hz, 18H), 0.51 (q,  $J = 7.9$  Hz, 12H).  $^{13}\text{C}$  NMR (100 MHz,  $\text{CDCl}_3$ ):  $\delta$  6.80, 6.38.  $^{29}\text{Si}$  NMR (79 MHz,  $\text{CDCl}_3$ ):  $\delta$  9.38. HRMS (ESI-TOF)  $m/z$ :

$[\text{M}+\text{Na}]^+$  calcd. for  $\text{C}_{12}\text{H}_{30}\text{OSi}_2\text{Na}^+$  269.1727; found: 269.1725.

### 1,1,1,3,3,3-hexapropyldisiloxane (2h)

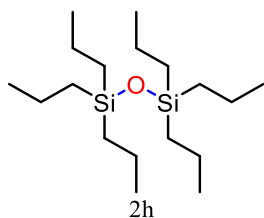

**2h** was obtained in 65% yield (393.2 mg) as a colorless liquid after silica gel column chromatography using PE/EtOAc (100:1).  $^1\text{H}$  NMR (400 MHz,  $\text{CDCl}_3$ ):  $\delta$  1.38-1.28 (m, 12H), 0.95 (t,  $J = 7.3$  Hz, 18H), 0.50 (t,  $J = 8.0$  Hz, 12H).  $^{13}\text{C}$  NMR (100 MHz,  $\text{CDCl}_3$ ):  $\delta$  18.57, 18.47, 16.79.  $^{29}\text{Si}$  NMR (79 MHz,  $\text{CDCl}_3$ ): 5.83. HRMS (ESI-TOF)  $m/z$ :  $[\text{M}+\text{Na}]^+$  calcd. for

$\text{C}_{18}\text{H}_{42}\text{OSi}_2\text{Na}^+$  353.2666; found: 353.2669.

### 1,1,1,3,3,3-hexaisopropyldisiloxane (2i)

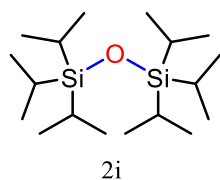

**2i** was obtained in 50% yield (206.2 mg) as a colorless liquid after silica gel column chromatography using PE/EtOAc (100:1).  $^1\text{H}$  NMR (400 MHz,  $\text{CD}_3\text{Cl}$ ):  $\delta$  1.049-0.999 (s, 42H);  $^{13}\text{C}$  NMR (100 MHz,  $\text{CDCl}_3$ ):  $\delta$  18.20, 13.67.  $^{29}\text{Si}$  NMR (79 MHz,  $\text{CDCl}_3$ ):  $\delta$  15.50. HRMS (ESI-TOF)  $m/z$ :  $[\text{M}+\text{Na}]^+$  calcd. for

$\text{C}_{18}\text{H}_{42}\text{OSi}_2\text{Na}^+$  353.2666; found: 353.2666.

### 1,1,1,3,3,5,5,7,7,7-decamethyltetrasiloxane(2j)<sup>4</sup>

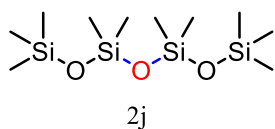

**2j** was obtained in 78% yield (302.2 mg) as a colorless liquid after silica gel column chromatography using PE/EtOAc (100:1).  $^1\text{H}$  NMR (400 MHz,  $\text{CDCl}_3$ ):  $\delta$  0.09 (s, 18H), 0.04 (s, 12H).  $^{13}\text{C}$  NMR (100 MHz,  $\text{CDCl}_3$ ):  $\delta$  1.79,

1.14.  $^{29}\text{Si}$  NMR (79 MHz,  $\text{CDCl}_3$ ):  $\delta$  7.74, -21.56. HRMS (ESI-TOF)  $m/z$ :  $[\text{M}+\text{Na}]^+$  calcd. for  $\text{C}_{10}\text{H}_{30}\text{O}_3\text{Si}_4\text{Na}^+$  333.1164; found: 333.1159.

### 1,3-di-tert-butyl-1,1,3,3-tetramethyldisiloxane (**2k**)<sup>5</sup>

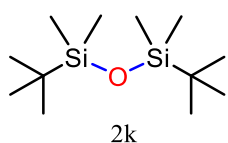

2k

**2k** was obtained in 64% yield (196.8 mg) as a colorless liquid after silica gel column chromatography using PE/EtOAc (100:1).  $^1\text{H}$  NMR (400 MHz,  $\text{CDCl}_3$ ):  $\delta$  0.86 (s, 18H), -0.00 (s, 12H).  $^{13}\text{C}$  NMR (100 MHz,  $\text{CDCl}_3$ ):  $\delta$  25.69, 18.11, -

3.04.  $^{29}\text{Si}$  NMR (79 MHz,  $\text{CDCl}_3$ ):  $\delta$  10.48. HRMS (ESI-TOF)  $m/z$ :  $[\text{M}+\text{Na}]^+$  calcd. for  $\text{C}_{12}\text{H}_{30}\text{OSi}_2\text{Na}^+$  269.1727; found: 269.1727.

### 1,1,1,3,3,5,5,7,7,9,9,11,11-tetradecamethylhexasiloxane (**2l**)

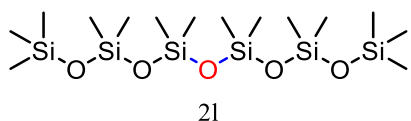

2l

**2l** was obtained in 76% yield (435.1 mg) as a colorless liquid after silica gel column chromatography using PE/EtOAc (100:1).  $^1\text{H}$  NMR (400 MHz,  $\text{CDCl}_3$ ):  $\delta$  0.08 (s, 18H), 0.06 (s, 12H), 0.04 (s,

12H).  $^{13}\text{C}$  NMR (100 MHz,  $\text{CDCl}_3$ ):  $\delta$  1.79, 1.14, 1.05.  $^{29}\text{Si}$  NMR (79 MHz,  $\text{CDCl}_3$ ):  $\delta$  7.80, -20.93, -42.50. HRMS (ESI-TOF)  $m/z$ :  $[\text{M}+\text{Na}]^+$  calcd. for  $\text{C}_{14}\text{H}_{42}\text{O}_5\text{Si}_6\text{Na}^+$  481.1540; found: 481.1536.

### 1-((dimethyl(vinyl)silyl)methyl)-1,1,3,3,5,5-hexamethyl-5-vinyltrisiloxane (**2m**)

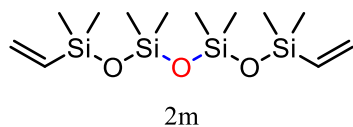

2m

**2m** was obtained in 80% yield (334.2 mg) as a colorless liquid after silica gel column chromatography using PE/EtOAc (100:1).  $^1\text{H}$  NMR

(400 MHz,  $\text{CDCl}_3$ ):  $\delta$  6.12 (dd,  $J = 20.4, 14.9$  Hz, 2H), 5.92 (dd,  $J = 14.9, 3.9$  Hz, 2H), 5.72 (dd,  $J = 20.4, 3.9$  Hz, 2H), 0.18-0.12 (12H), 0.08-0.02 (12H).  $^{13}\text{C}$  NMR (100 MHz,  $\text{CDCl}_3$ ):  $\delta$  139.34, 131.64, 1.16, 0.25.  $^{29}\text{Si}$  NMR (79 MHz,  $\text{CDCl}_3$ ):  $\delta$  -2.57, -17.34. HRMS (ESI-TOF)  $m/z$ :  $[\text{M}+\text{Na}]^+$  calcd. for  $\text{C}_{12}\text{H}_{30}\text{O}_3\text{Si}_4\text{Na}^+$  357.1164; found: 357.1161.

### 1,1,3-trimethyl-1,3,3-triphenyldisiloxane (**2n**)

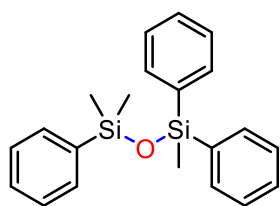

2n

**2n** was obtained in 59% yield (256.7 mg) as a colorless liquid after silica gel column chromatography using PE/EtOAc (100:1),  $R_f = 0.33$ .  $^1\text{H}$  NMR (400 MHz,  $\text{CDCl}_3$ ):  $\delta$  7.57-7.50 (m, 6H), 7.42-7.30 (m, 9H), 0.61-0.57 (3H), 0.33 (s, 6H).  $^{13}\text{C}$  NMR (100 MHz,  $\text{CDCl}_3$ ):  $\delta$  139.50, 137.85, 133.90, 132.99, 129.51, 129.29, 127.71, 0.85, -0.55.  $^{29}\text{Si}$  NMR (79 MHz,  $\text{CDCl}_3$ ):  $\delta$  0.52, -

10.48. HRMS (ESI-TOF)  $m/z$ :  $[\text{M}+\text{Na}]^+$  calcd. for  $\text{C}_{21}\text{H}_{24}\text{OSi}_2\text{Na}^+$  371.1258; found: 371.1255.

### 1,1-dimethyl-1,3,3,3-tetraphenyldisiloxane (**2o**)

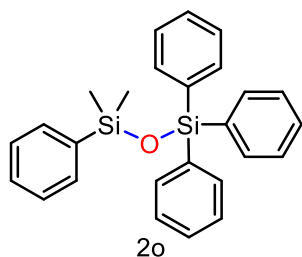

2o

**2o** was obtained in 65% yield (333.3 mg) as a white solid (m.p. 198-200 °C) after silica gel column chromatography using PE/EtOAc (50:1),  $R_f = 0.22$ .  $^1\text{H}$  NMR (400 MHz,  $\text{CDCl}_3$ ):  $\delta$  7.61-7.55 (m, 6H), 7.55-7.50 (m, 2H), 7.42 (t,  $J = 6.6$  Hz, 3H), 7.38-7.28 (m, 9H), 0.33 (s, 6H).  $^{13}\text{C}$  NMR

(100 MHz, CDCl<sub>3</sub>): δ 139.25, 136.38, 135.82, 134.99, 133.10, 129.77, 129.30, 127.71, 0.88. <sup>29</sup>Si NMR (79 MHz, CDCl<sub>3</sub>): δ 1.30, -19.86. HRMS (ESI-TOF) m/z: [M+Na]<sup>+</sup> calcd. for C<sub>26</sub>H<sub>26</sub>OSi<sub>2</sub>Na<sup>+</sup> 433.1414; found: 433.1411.

### 1,1,1-tribenzyl-3,3-dimethyl-3-phenyldisiloxane (2p)

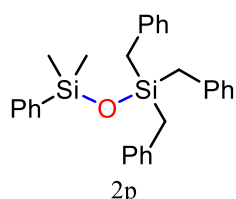

**2p** was obtained in 58% yield (327.8 mg) as a colorless liquid after silica gel column chromatography using PE/EtOAc (100:1), R<sub>f</sub> = 0.19. <sup>1</sup>H NMR (400 MHz, CDCl<sub>3</sub>) δ 7.41-7.33 (m, 1H), 7.32-7.26 (m, 3H), 7.25-7.23 (1H), 7.18 (t, J = 7.5 Hz, 6H), 7.09 (t, J = 7.5 Hz, 3H), 6.98-6.91 (m, 6H), 2.12 (s, 6H), 0.08 (s,

6H). <sup>13</sup>C NMR (100 MHz, CDCl<sub>3</sub>): δ 139.39, 138.22, 132.98, 129.19, 128.74, 128.28, 127.63, 124.38, 24.69, 0.48. <sup>29</sup>Si NMR (79 MHz, CDCl<sub>3</sub>): δ -0.42, -3.15. HRMS (ESI-TOF) m/z: [M+Na]<sup>+</sup> calcd. for C<sub>29</sub>H<sub>32</sub>OSi<sub>2</sub>Na<sup>+</sup> 475.1884; found: 475.1901.

### 1,1,1,3-tetrabenzyl-3,3-dimethyldisiloxane (2q)

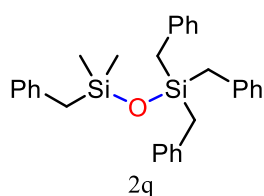

**2q** was obtained in 56% yield (326.3 mg) as a colorless liquid after silica gel column chromatography using PE/EtOAc (50:1), R<sub>f</sub> = 0.28. <sup>1</sup>H NMR (400 MHz, CDCl<sub>3</sub>): δ 7.25-7.15 (m, 8H), 7.15-7.00 (m, 4H), 6.92 (d, J = 7.8 Hz, 6H), 6.79 (d, J = 8.2 Hz, 2H), 2.07 (s, 6H), 1.90 (s, 2H), -0.18 (s, 6H). <sup>13</sup>C

NMR (100 MHz, CDCl<sub>3</sub>): δ 139.19, 138.34, 128.71, 128.42, 128.28, 128.15, 124.39, 124.16, 28.32, 24.67, -0.33. <sup>29</sup>Si NMR (79 MHz, CDCl<sub>3</sub>): δ 6.29, -3.77. HRMS (ESI-TOF) m/z: [M+Na]<sup>+</sup> calcd. for C<sub>30</sub>H<sub>34</sub>OSi<sub>2</sub>Na<sup>+</sup> 489.2040; found: 489.2040.

### 1-benzyl-1,1,3-trimethyl-3,3-diphenyldisiloxane (2r)

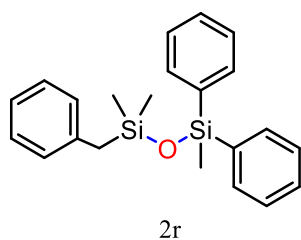

**2r** was obtained in 62% yield (280.7 mg) as a colorless liquid after silica gel column chromatography using PE/EtOAc (50:1), R<sub>f</sub> = 0.28. <sup>1</sup>H NMR (400 MHz, CDCl<sub>3</sub>): δ 7.59-7.50 (m, 4H), 7.45-7.35 (m, 6H), 7.25-7.18 (2H), 7.12 (t, J = 7.3 Hz, 1H), 7.03 (d, J = 7.3 Hz, 2H), 2.20 (s, 2H), 0.58 (s, 3H), 0.12 (s, 6H). <sup>13</sup>C NMR (100 MHz, CDCl<sub>3</sub>): δ 139.11, 137.89,

133.85, 129.49, 128.31, 128.15, 127.69, 124.07, 28.51, -0.68. <sup>29</sup>Si NMR (79 MHz, CDCl<sub>3</sub>): δ 7.43, -11.04. HRMS (ESI-TOF) m/z: [M+Na]<sup>+</sup> calcd. for C<sub>22</sub>H<sub>26</sub>OSi<sub>2</sub>Na<sup>+</sup> 385.1414; found: 385.1424.

### 1-benzyl-1,1-dimethyl-3,3,3-triphenyldisiloxane (2s)

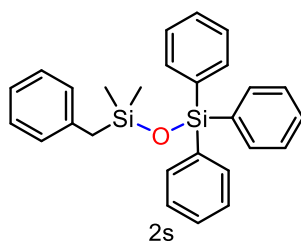

**2s** was obtained in 67% yield (355.2 mg) as a colorless liquid after silica gel column chromatography using PE/EtOAc (50:1), R<sub>f</sub> = 0.26. <sup>1</sup>H NMR (400 MHz, CDCl<sub>3</sub>) δ 7.49 (d, J = 6.4 Hz, 6H), 7.42 (d, J = 7.2 Hz, 3H), 7.35 (t, J = 7.2 Hz, 6H), 7.14 (t, J = 7.2 Hz, 2H), 7.07 (t, J = 7.2 Hz, 1H), 6.95 (d, J = 8.0 Hz, 2H), 2.16 (s, 2H), 0.05 (s, 6H). <sup>13</sup>C NMR (100 MHz,

CDCl<sub>3</sub>):  $\delta$  138.97, 135.87, 134.96, 129.74, 128.42, 128.17, 127.69, 124.07, 28.53, 0.03. <sup>29</sup>Si NMR (79 MHz, CDCl<sub>3</sub>):  $\delta$  8.27, -20.34. HRMS (ESI-TOF) m/z: [M+K]<sup>+</sup> calcd. for C<sub>27</sub>H<sub>28</sub>OSi<sub>2</sub>K<sup>+</sup> 463.1319; found: 463.1327.

### 1,1,1-triethyl-3-methyl-3,3-diphenyldisiloxane (2t)<sup>1</sup>

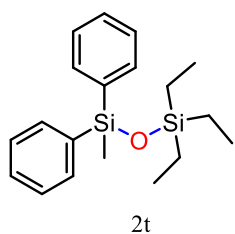

**2t** was obtained in 48% yield (196.9 mg) as a colorless liquid after silica gel column chromatography using PE/EtOAc (50:1), R<sub>f</sub> = 0.47. <sup>1</sup>H NMR (400 MHz, CDCl<sub>3</sub>):  $\delta$  7.56 (d, J = 7.3 Hz, 4H), 7.37 (t, J = 6.9 Hz, 6H), 0.90 (t, J = 7.8 Hz, 9H), 0.61 (s, 3H), 0.60-0.47 (6H). <sup>13</sup>C NMR (100 MHz, CDCl<sub>3</sub>):  $\delta$  138.33, 133.81, 129.38, 127.64, 6.76, 6.27, -0.52. <sup>29</sup>Si NMR (79 MHz, CDCl<sub>3</sub>):  $\delta$  13.09, -12.35. HRMS (ESI-TOF) m/z: [M+Na]<sup>+</sup> calcd. for C<sub>19</sub>H<sub>28</sub>OSi<sub>2</sub>Na<sup>+</sup> 351.1571; found: 351.1573.

### 1,1,1-triethyl-3,3,3-triphenyldisiloxane (2u)<sup>6</sup>

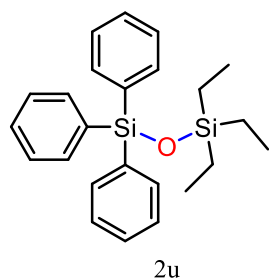

**2u** was obtained in 62% yield (302.4 mg) as a colorless liquid after silica gel column chromatography using PE/EtOAc (50:1), R<sub>f</sub> = 0.42. <sup>1</sup>H NMR (400 MHz, CDCl<sub>3</sub>):  $\delta$  7.59 (d, J = 9.6 Hz, 6H), 7.42 (t, J = 7.1 Hz, 3H), 7.39-7.33 (m, 6H), 0.87 (t, J = 8.0 Hz, 9H), 0.56 (q, J = 7.9 Hz, 6H). <sup>13</sup>C NMR (100 MHz, CDCl<sub>3</sub>):  $\delta$  136.28, 134.95, 129.67, 127.65, 6.76, 6.35. <sup>29</sup>Si NMR (79 MHz, CDCl<sub>3</sub>):  $\delta$  13.97, -21.25. HRMS (ESI-TOF) m/z: [M+Na]<sup>+</sup> calcd. for C<sub>24</sub>H<sub>30</sub>OSi<sub>2</sub>Na<sup>+</sup> 413.1727; found: 413.1735.

### 1,1,1-tribenzyl-3,3,3-triethyldisiloxane (2v)

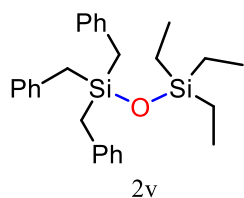

**2v** was obtained in 56% yield (313.4 mg) as a colorless liquid after silica gel column chromatography using PE/EtOAc (50:1), R<sub>f</sub> = 0.27. <sup>1</sup>H NMR (400 MHz, CDCl<sub>3</sub>):  $\delta$  7.23 (t, J = 8.0 Hz, 6H), 7.11 (t, J = 7.3 Hz, 3H), 7.02 (d, J = 7.8 Hz, 6H), 2.22-2.04 (6H), 0.86-0.70 (m, 9H), 0.39 (q, J = 7.9 Hz, 6H). <sup>13</sup>C NMR (100 MHz, CDCl<sub>3</sub>):  $\delta$  138.44, 128.68, 128.22, 124.32, 24.79, 6.71, 6.16. <sup>29</sup>Si NMR (79 MHz, CDCl<sub>3</sub>):  $\delta$  -3.98, -19.57. HRMS (ESI-TOF) m/z: [M+Na]<sup>+</sup> calcd. for C<sub>27</sub>H<sub>36</sub>OSi<sub>2</sub>Na<sup>+</sup> 455.2197; found: 455.2203.

### 1-allyl-5,5,5-tribenzyl-1,1,3,3-tetramethyltrisiloxane (2w)

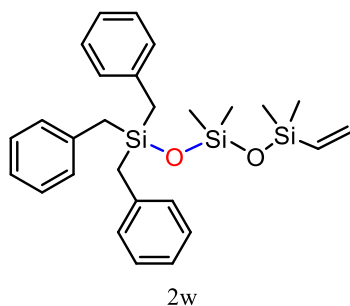

**2w** was obtained in 47% yield (279.8 mg) as a colorless liquid after silica gel column chromatography using PE/EtOAc (50:1), R<sub>f</sub> = 0.25. <sup>1</sup>H NMR (400 MHz, CDCl<sub>3</sub>):  $\delta$  7.24-7.17 (6H), 7.09 (t, J = 7.3 Hz, 3H), 7.00 (d, J = 7.3 Hz, 6H), 6.10 (dd, J = 20.1, 14.6 Hz, 1H), 5.94 (dd, J = 14.6, 4.1 Hz, 1H), 5.72 (dd, J = 20.4, 3.9 Hz, 1H), 2.11 (s, 6H), 0.13 (s, 6H), -0.15 (s, 6H). <sup>13</sup>C NMR (100 MHz, CDCl<sub>3</sub>):  $\delta$  139.17,

138.36, 131.85, 128.75, 128.24, 124.34, 25.54, 1.06, 0.24.  $^{29}\text{Si}$  NMR (79 MHz,  $\text{CDCl}_3$ ):  $\delta$  12.22, -3.24, -4.46. HRMS (ESI-TOF)  $m/z$ :  $[\text{M}+\text{Na}]^+$  calcd. for  $\text{C}_{27}\text{H}_{36}\text{O}_2\text{Si}_3\text{Na}^+$  499.1915; found: 499.1929.

#### 1-allyl-1,1,3,3-tetramethyl-5,5,5-triphenyltrisiloxane (2x)

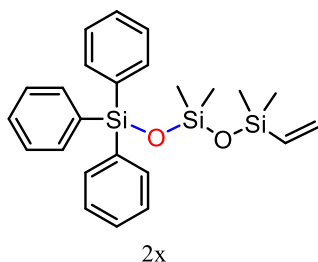

**2x** was obtained in 48% yield (260.5 mg) as a colorless liquid after silica gel column chromatography using PE/EtOAc (50:1),  $R_f = 0.31$ .  $^1\text{H}$  NMR (400 MHz,  $\text{CDCl}_3$ ):  $\delta$  7.66-7.52 (m, 6H), 7.42 (t,  $J = 6.6$  Hz, 3H), 7.38-7.33 (6H), 6.06 (dd,  $J = 8.6, 4.5$  Hz, 1H), 5.88 (dd,  $J = 14.6, 4.1$  Hz, 1H), 5.67 (dd,  $J = 6.7, 4.5$  Hz, 1H), 0.07 (s, 6H), 0.06 (s, 6H).  $^{13}\text{C}$  NMR (100

MHz,  $\text{CDCl}_3$ ):  $\delta$  139.13, 135.93, 135.01, 131.71, 129.72, 127.65, 1.34, 0.11.  $^{29}\text{Si}$  NMR (79 MHz,  $\text{CDCl}_3$ ):  $\delta$  -2.69, -17.50, -19.19. HRMS (ESI-TOF)  $m/z$ :  $[\text{M}+\text{Na}]^+$  calcd. for  $\text{C}_{24}\text{H}_{30}\text{O}_2\text{Si}_3\text{Na}^+$  457.1446; found: 457.1457.

#### Reference

- [1] P. E. Gonzalez, H. K. Sharma, K. H. Pannell, DMF-activated Chlorosilane Chemistry: Molybdenum-catalyzed Reactions of  $\text{R}_3\text{SiH}$ , DMF and  $\text{R}'_3\text{SiCl}$  to initially form  $\text{R}_3\text{SiOSiR}'_3$  and  $\text{R}_3\text{SiCl}$ , *Inorg. Chim. Acta*, 2017, **466**, 376–381.
- [2] H. P. Lv, R. D. Laishram, J. Y. Li, G. R. Shi, W. Q. Sun, J. B. Xu, Y. Yang, Y. Luo, B. M. Fan, Nickel(0) catalyzed oxidation of organosilanes to disiloxanes by air as an oxidant, *Tetrahedron Lett.*, 2019, **60**, 971–974.
- [3] K. Kikushima, M. Grellier, M. Ohashi, S. Ogoshi, Transition-metal-free catalytic hydrodefluorination of polyfluoroarenes by concerted nucleophilic aromatic substitution with a hydrosilicate. *Angew. Chem. Int. Ed.*, 2017, **56**, 16191–16196.
- [4] J. Beckmann, K. Jurkschat, D. Müller, S. Rabe, M. Schürmann, 1,1,3,3,5,5,7,7-Octaphenyl-1,3,5,7-tetrasiloxane-1,7-diol and its organotin derivatives. Model compounds for diphenylsiloxane polymer, *Organometallics*, 2013, **32**, 3788–3794.
- [5] P. Patschinski, C. Zhang, H. Zipse, The Lewis base-catalyzed silylation of alcohols—a mechanistic analysis, *J. Org. Chem.*, 2014, **79**, 8348–8357.
- [6] R. T. Anderson, X. N. Zang, R. Fernando, M. J. Dzara, C. Ngo, M. Sharps, R. Pinals, S. Pylypenko, M. T. Lusk, A. Sellinger, Direct conversion of hydride- to siloxane-terminated silicon quantum dots, *J. Phys. Chem. C*, 2016, **120**, 25822–25831.

#### IV. Copies of the $^1\text{H}$ , $^{19}\text{F}$ and $^{13}\text{C}$ NMR spectra



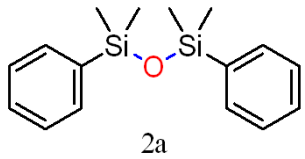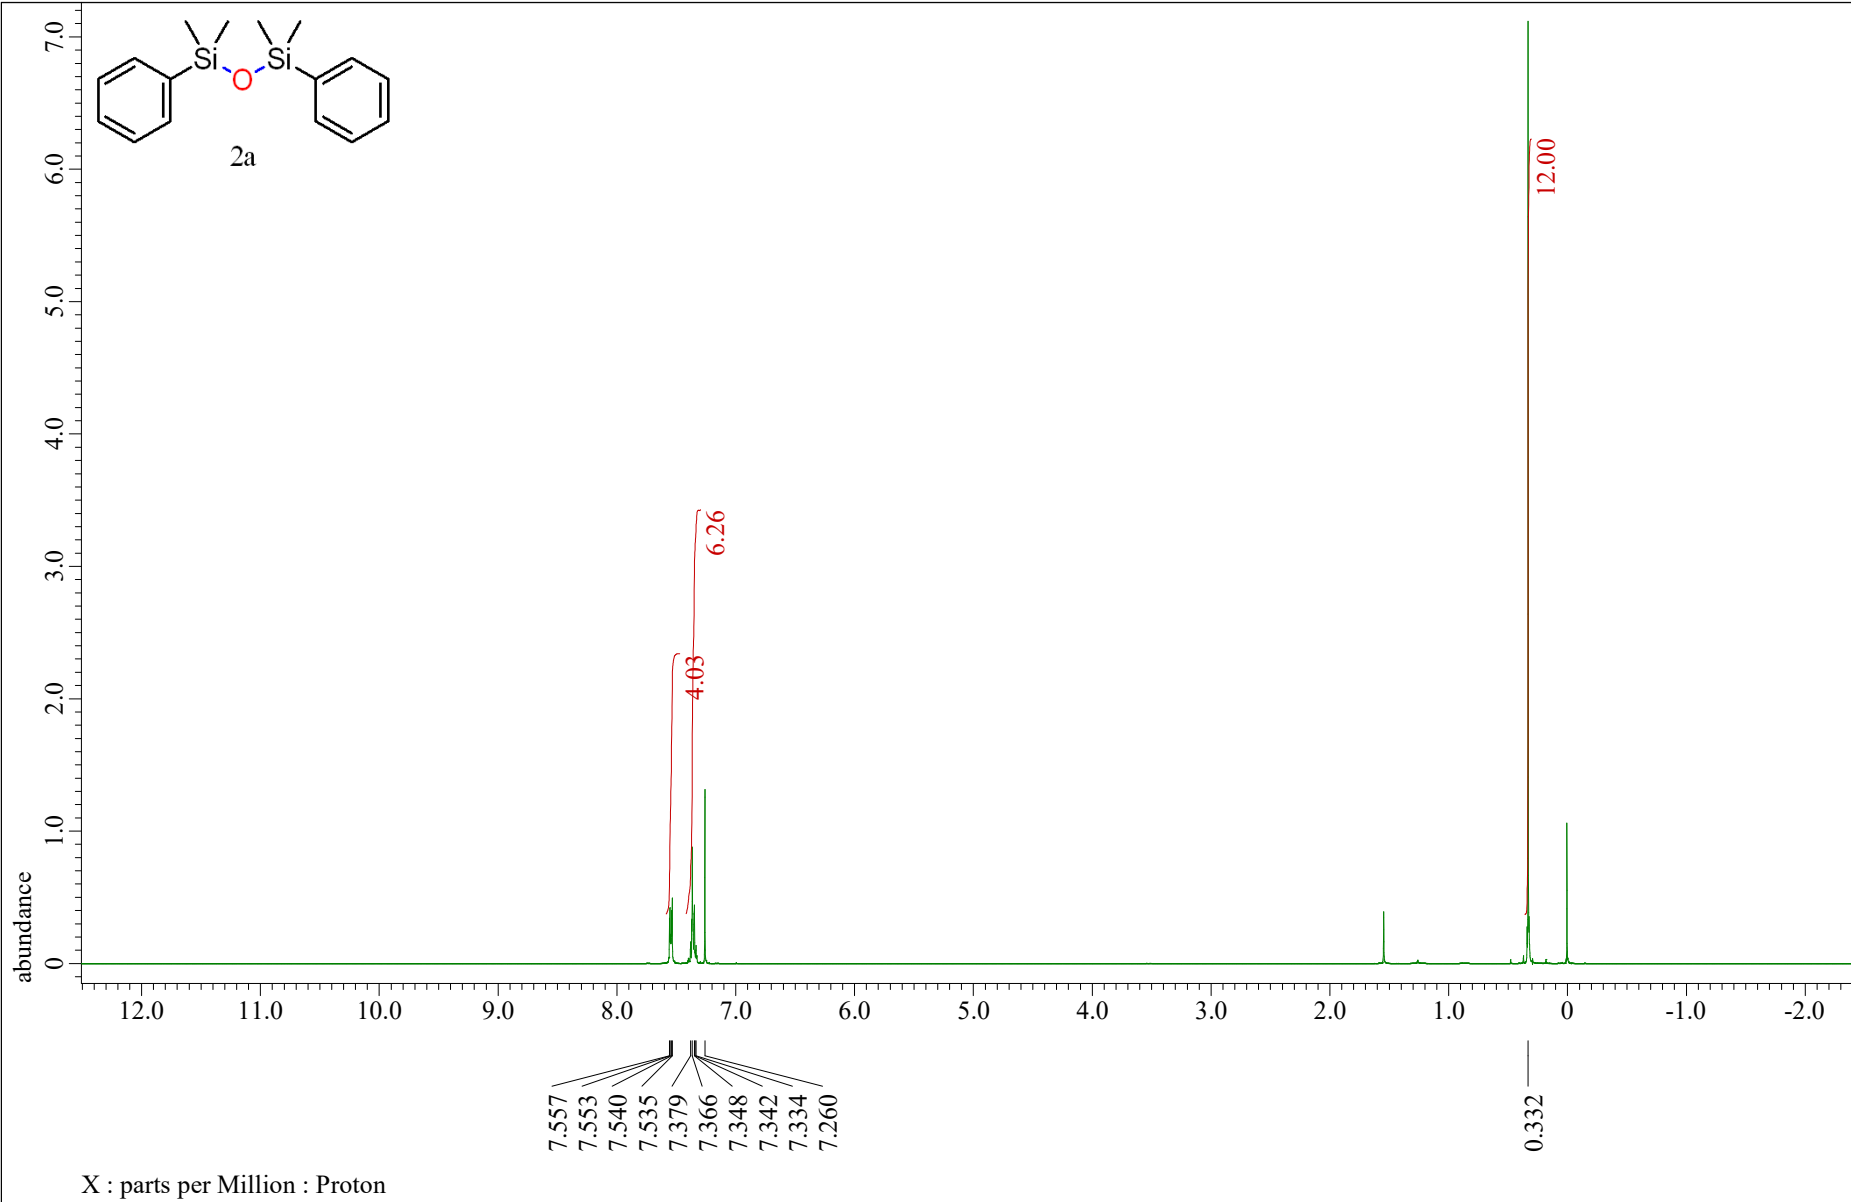

LC-188-3\_Carbon-2-4.jdf

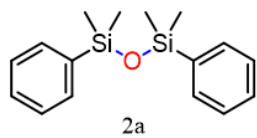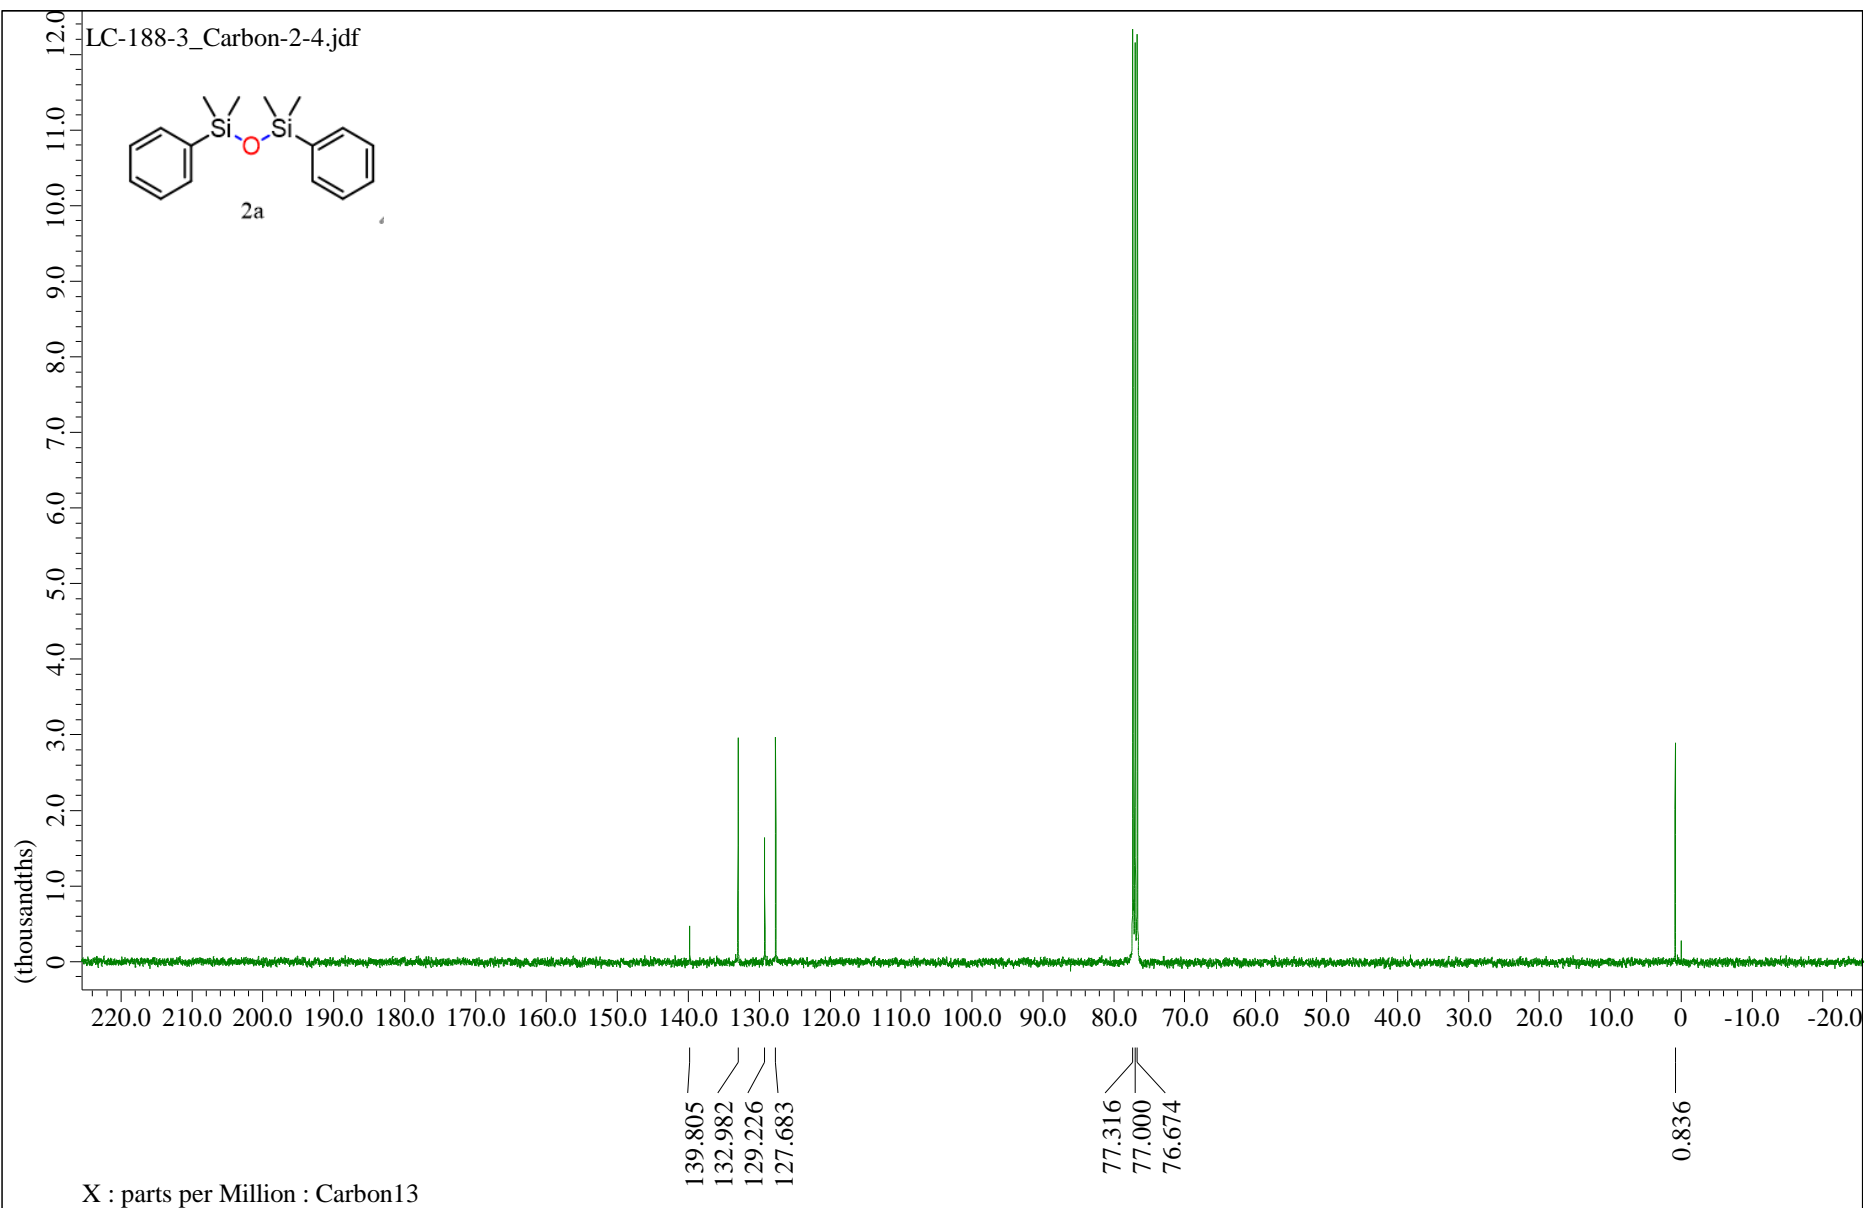

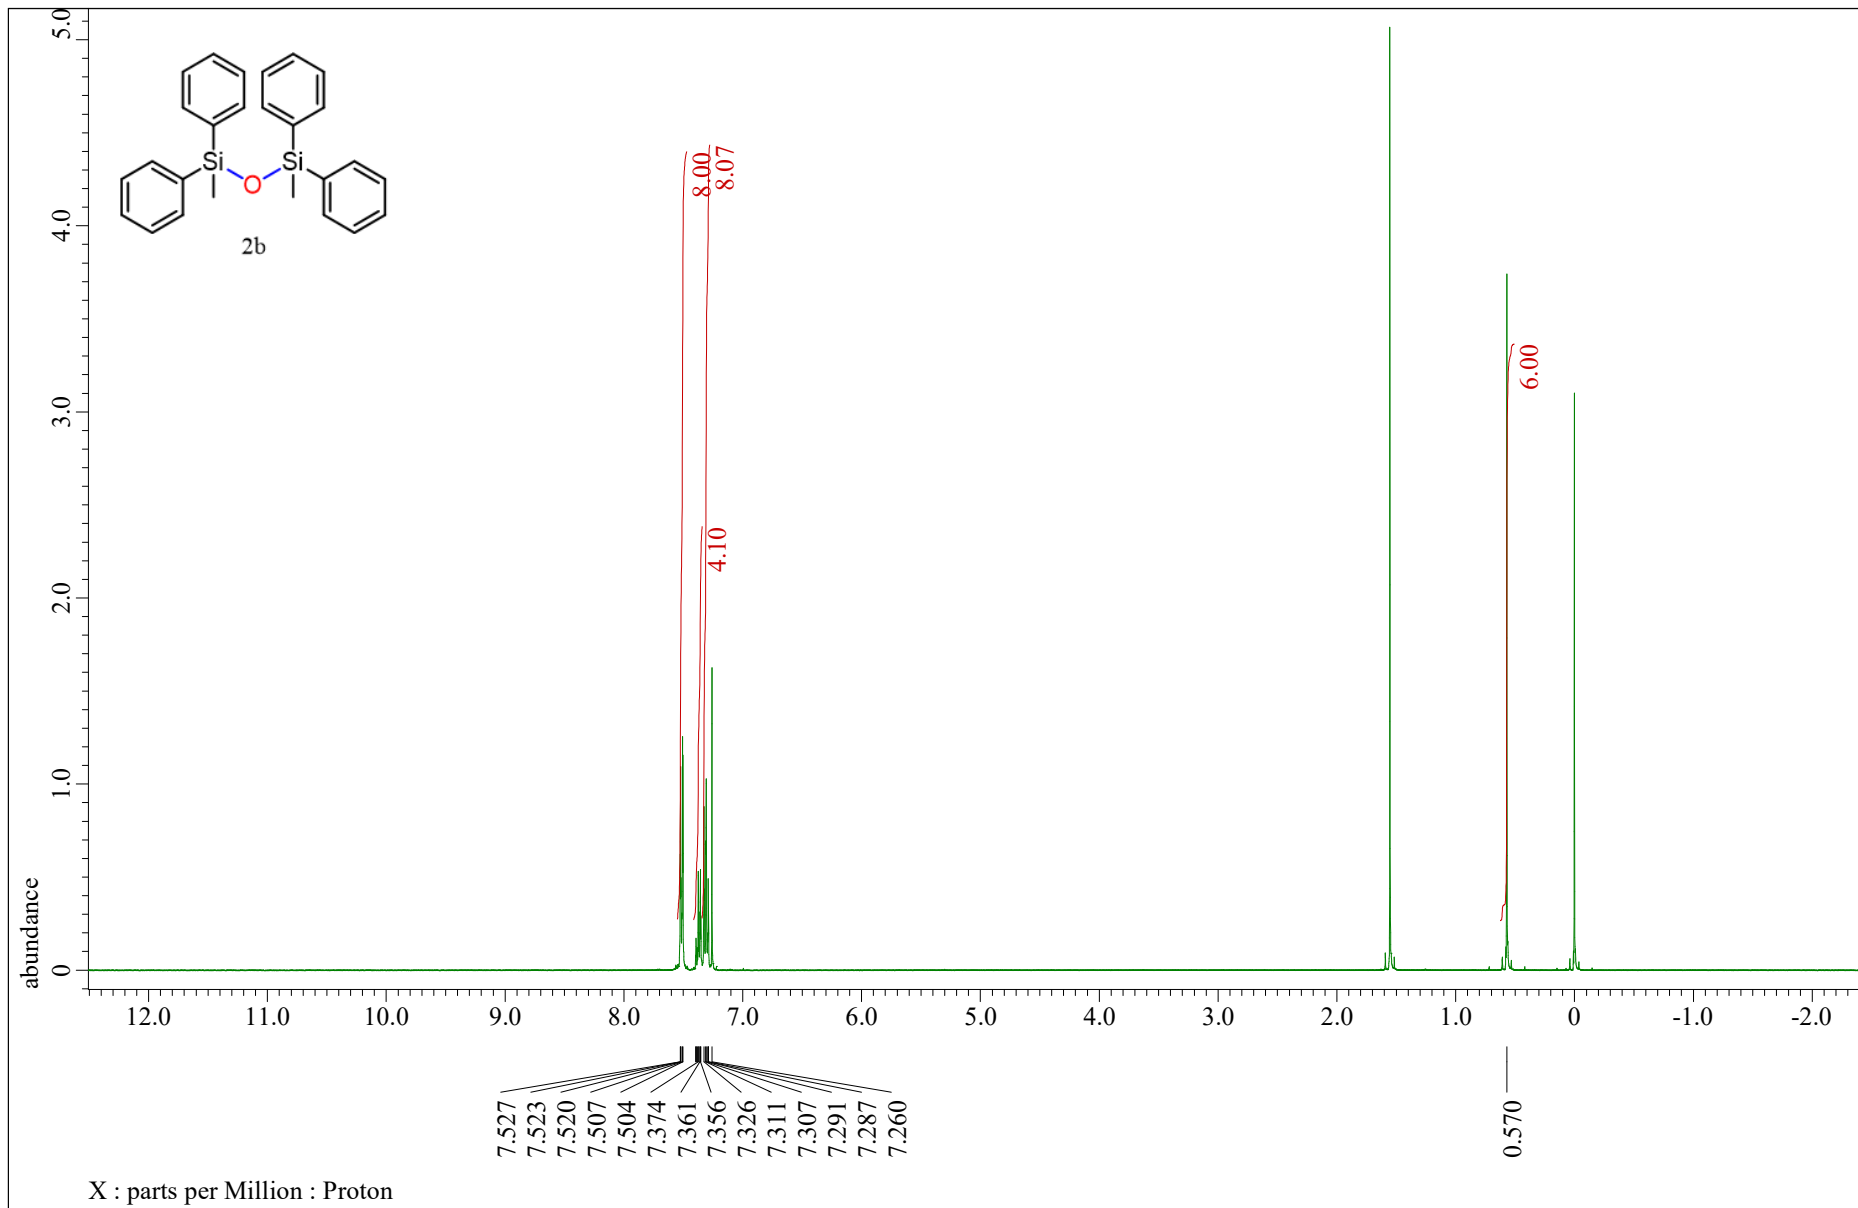

LC-214-2\_Carbon-1-3.jdf

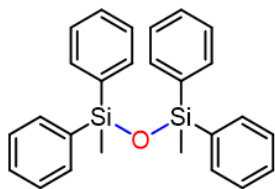

2b

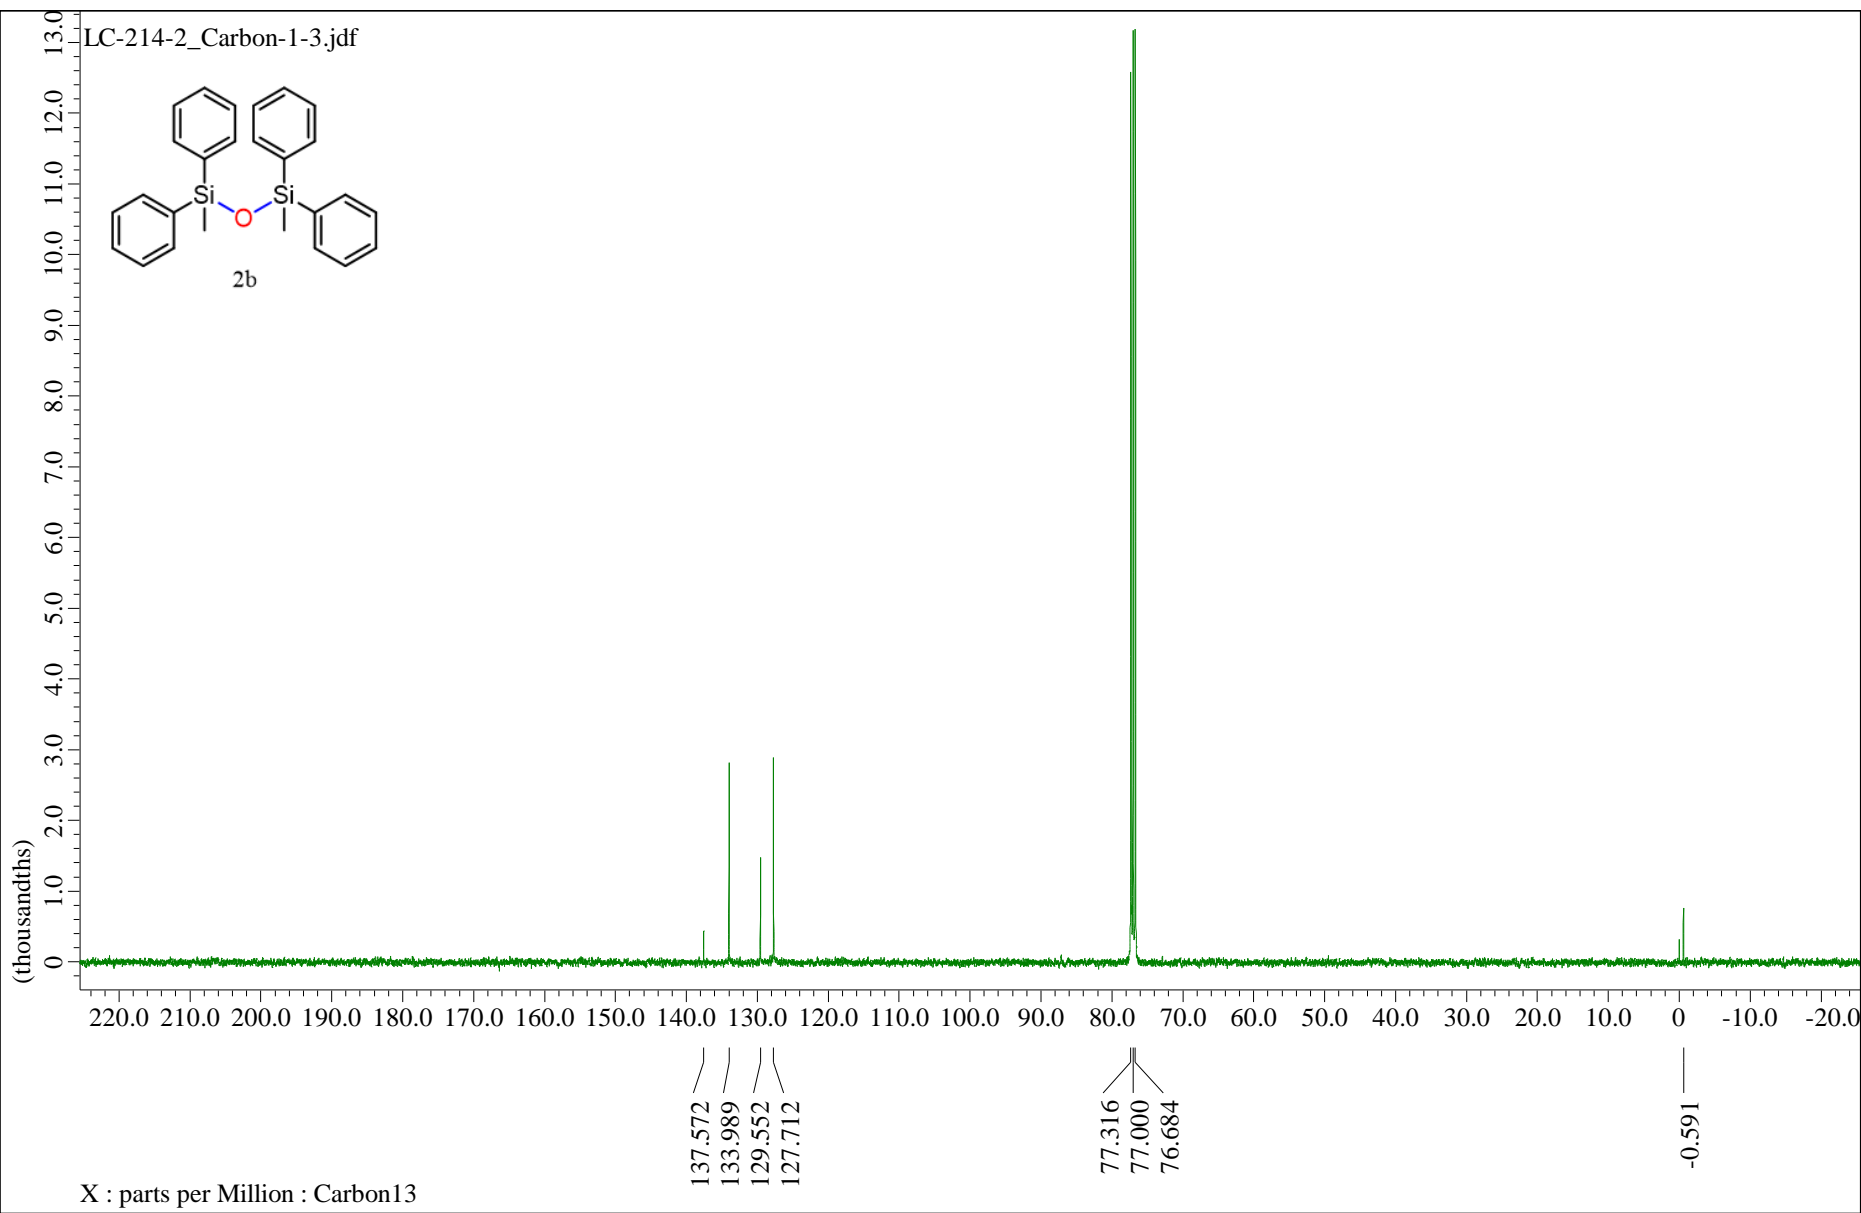

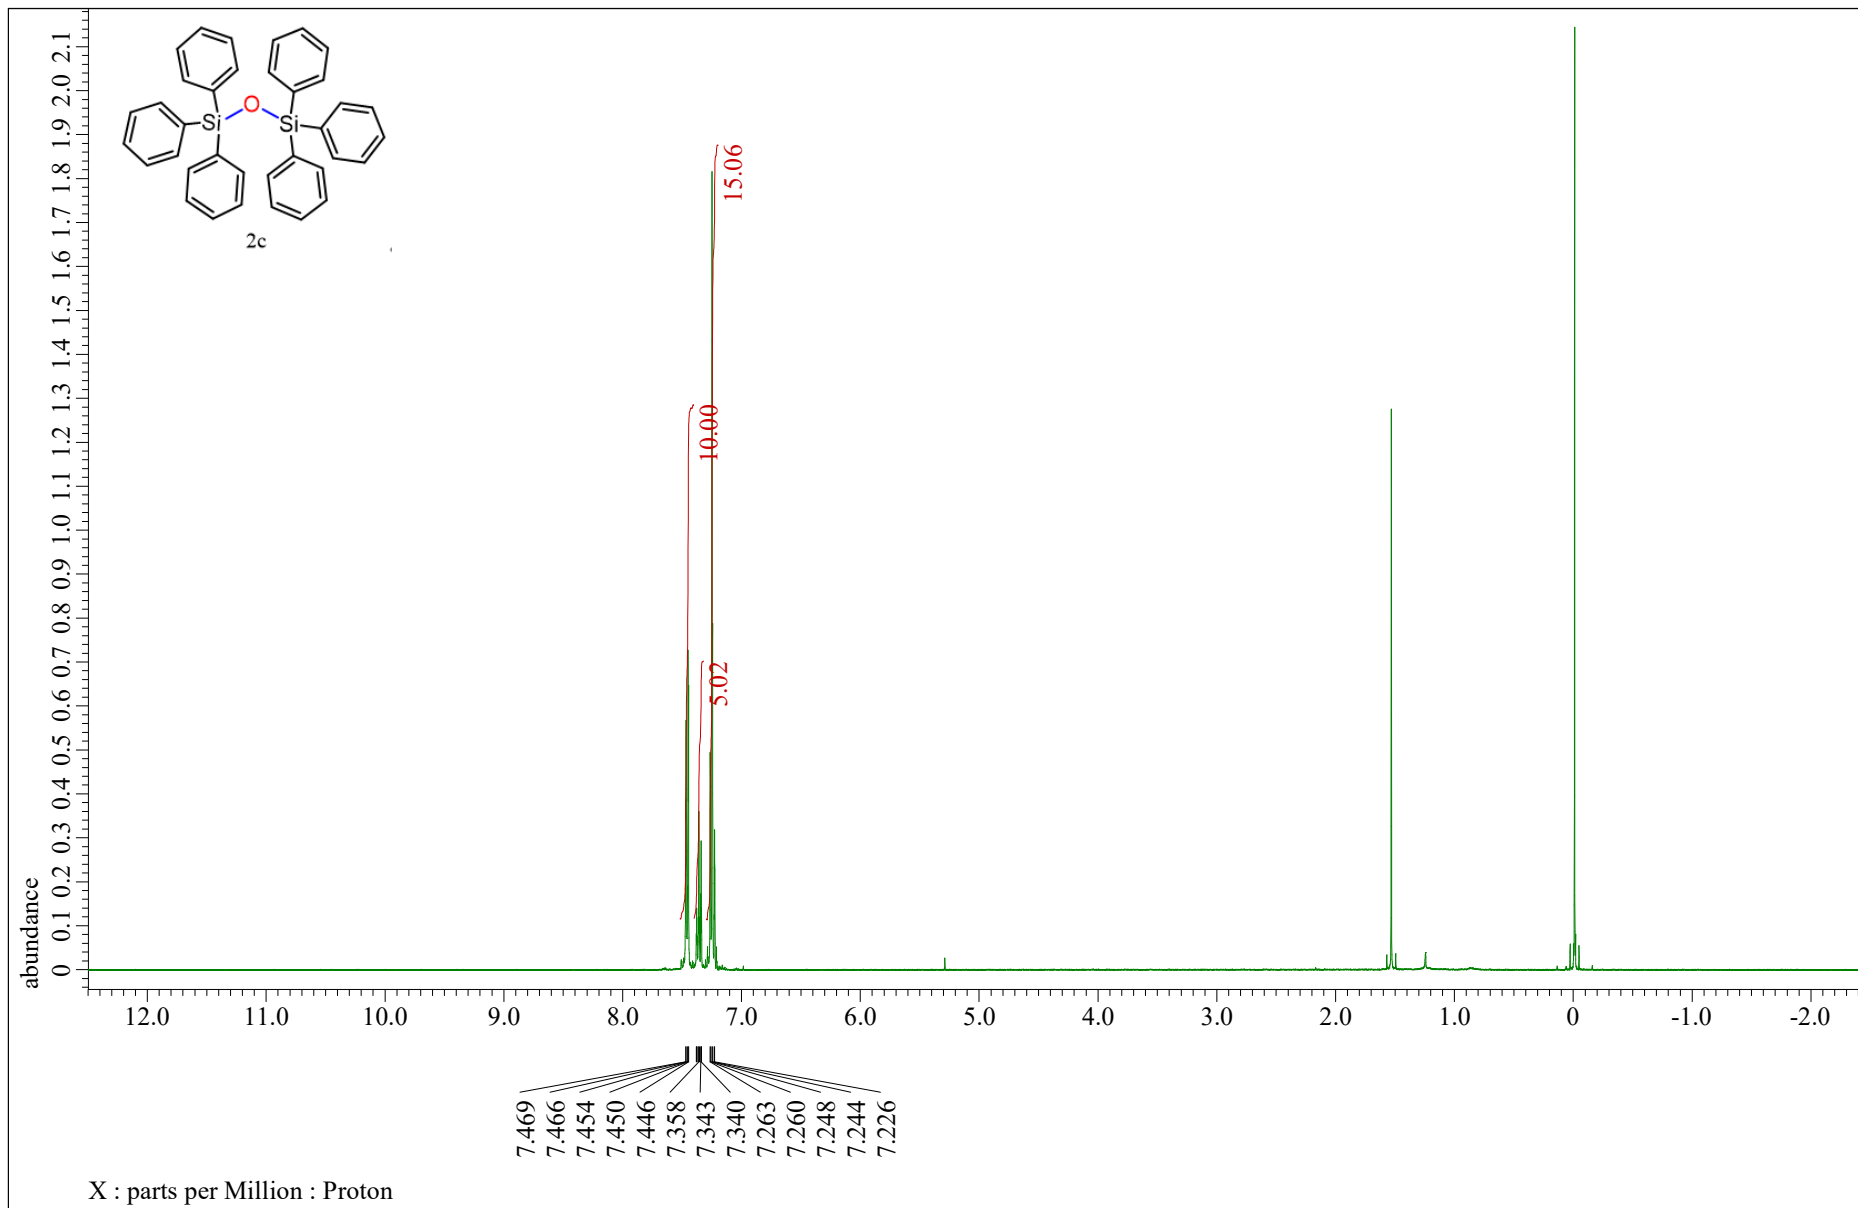

LC-215-13\_Carbon-1-3.jdf

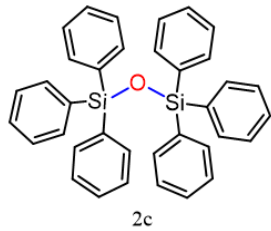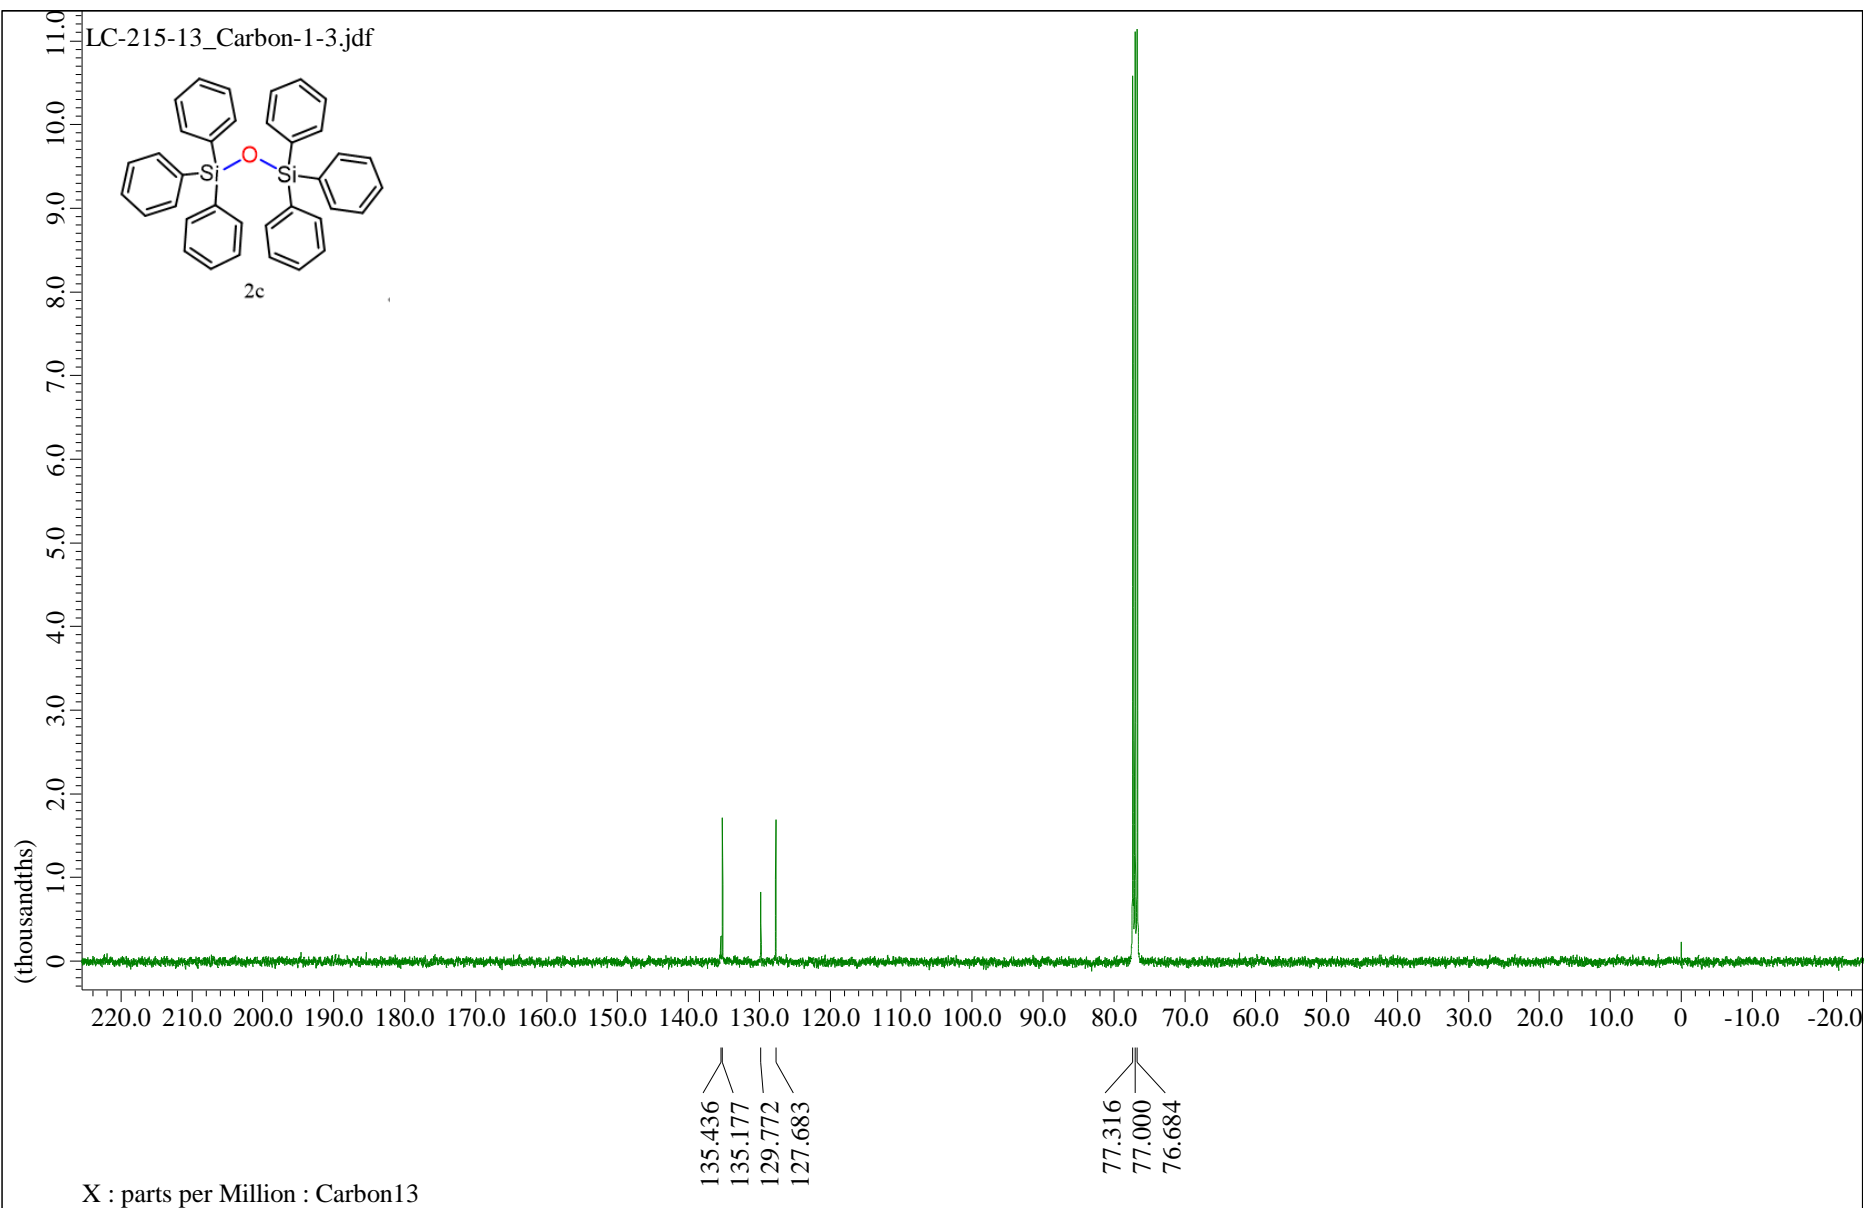

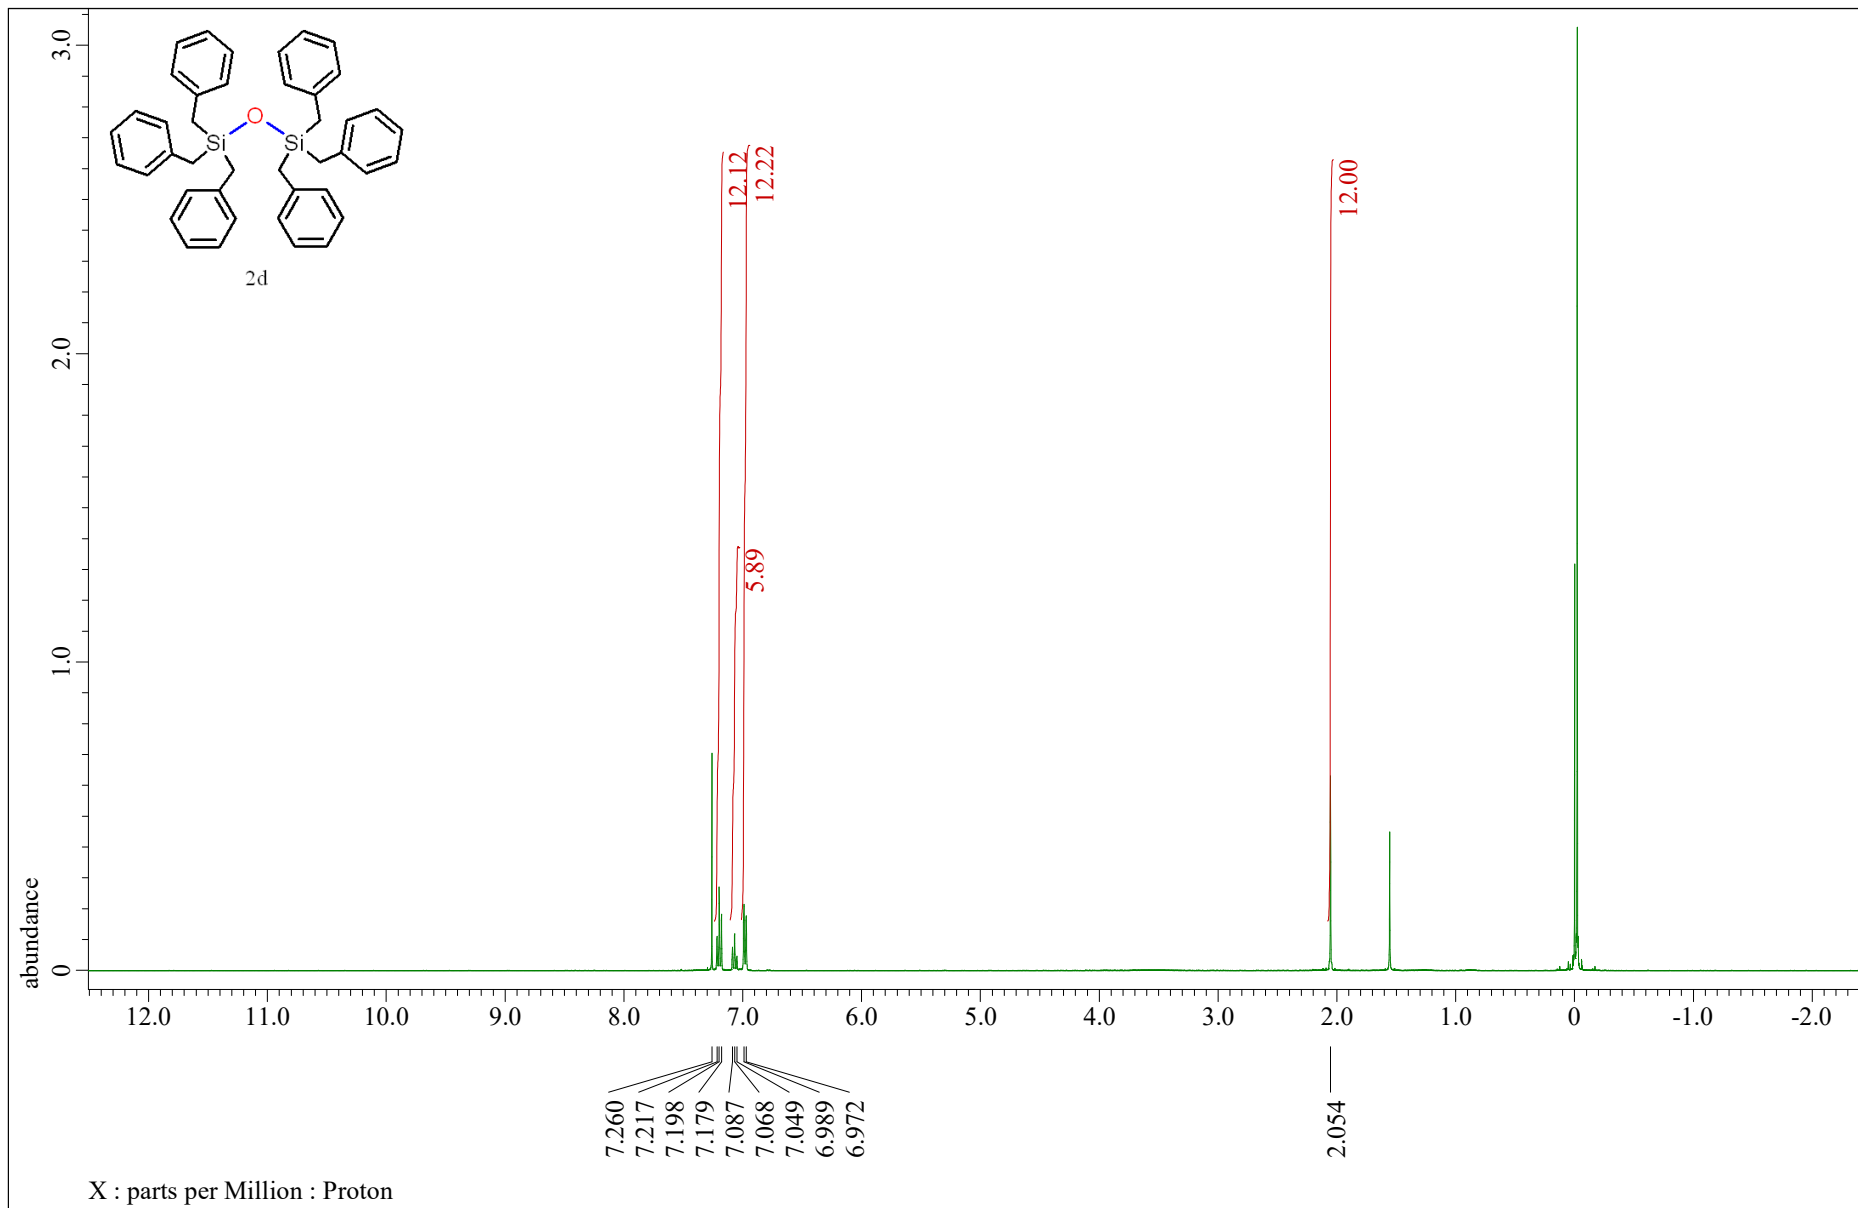

LC-227-2\_Carbon-1-3.jdf

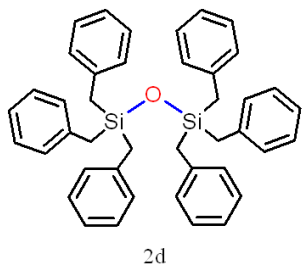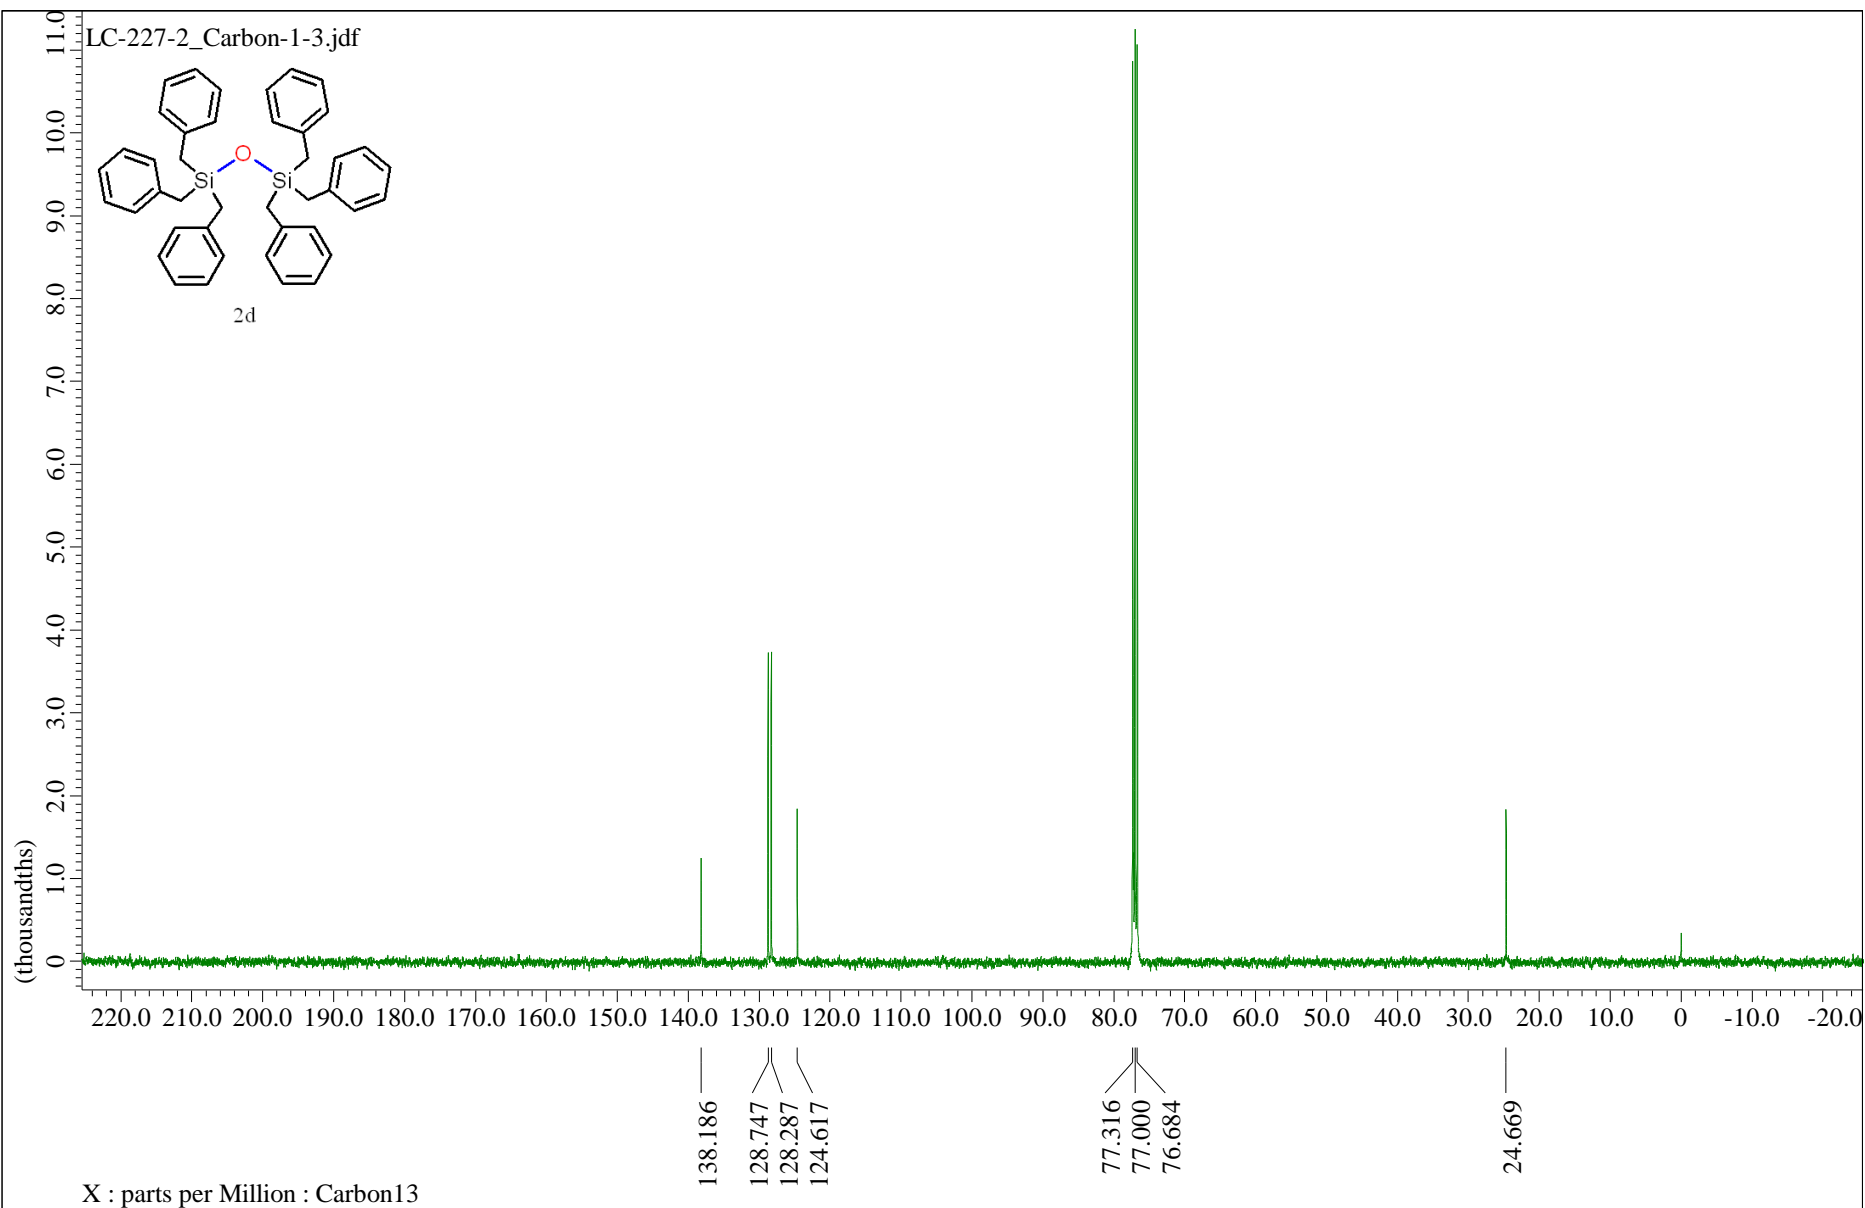



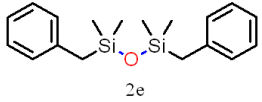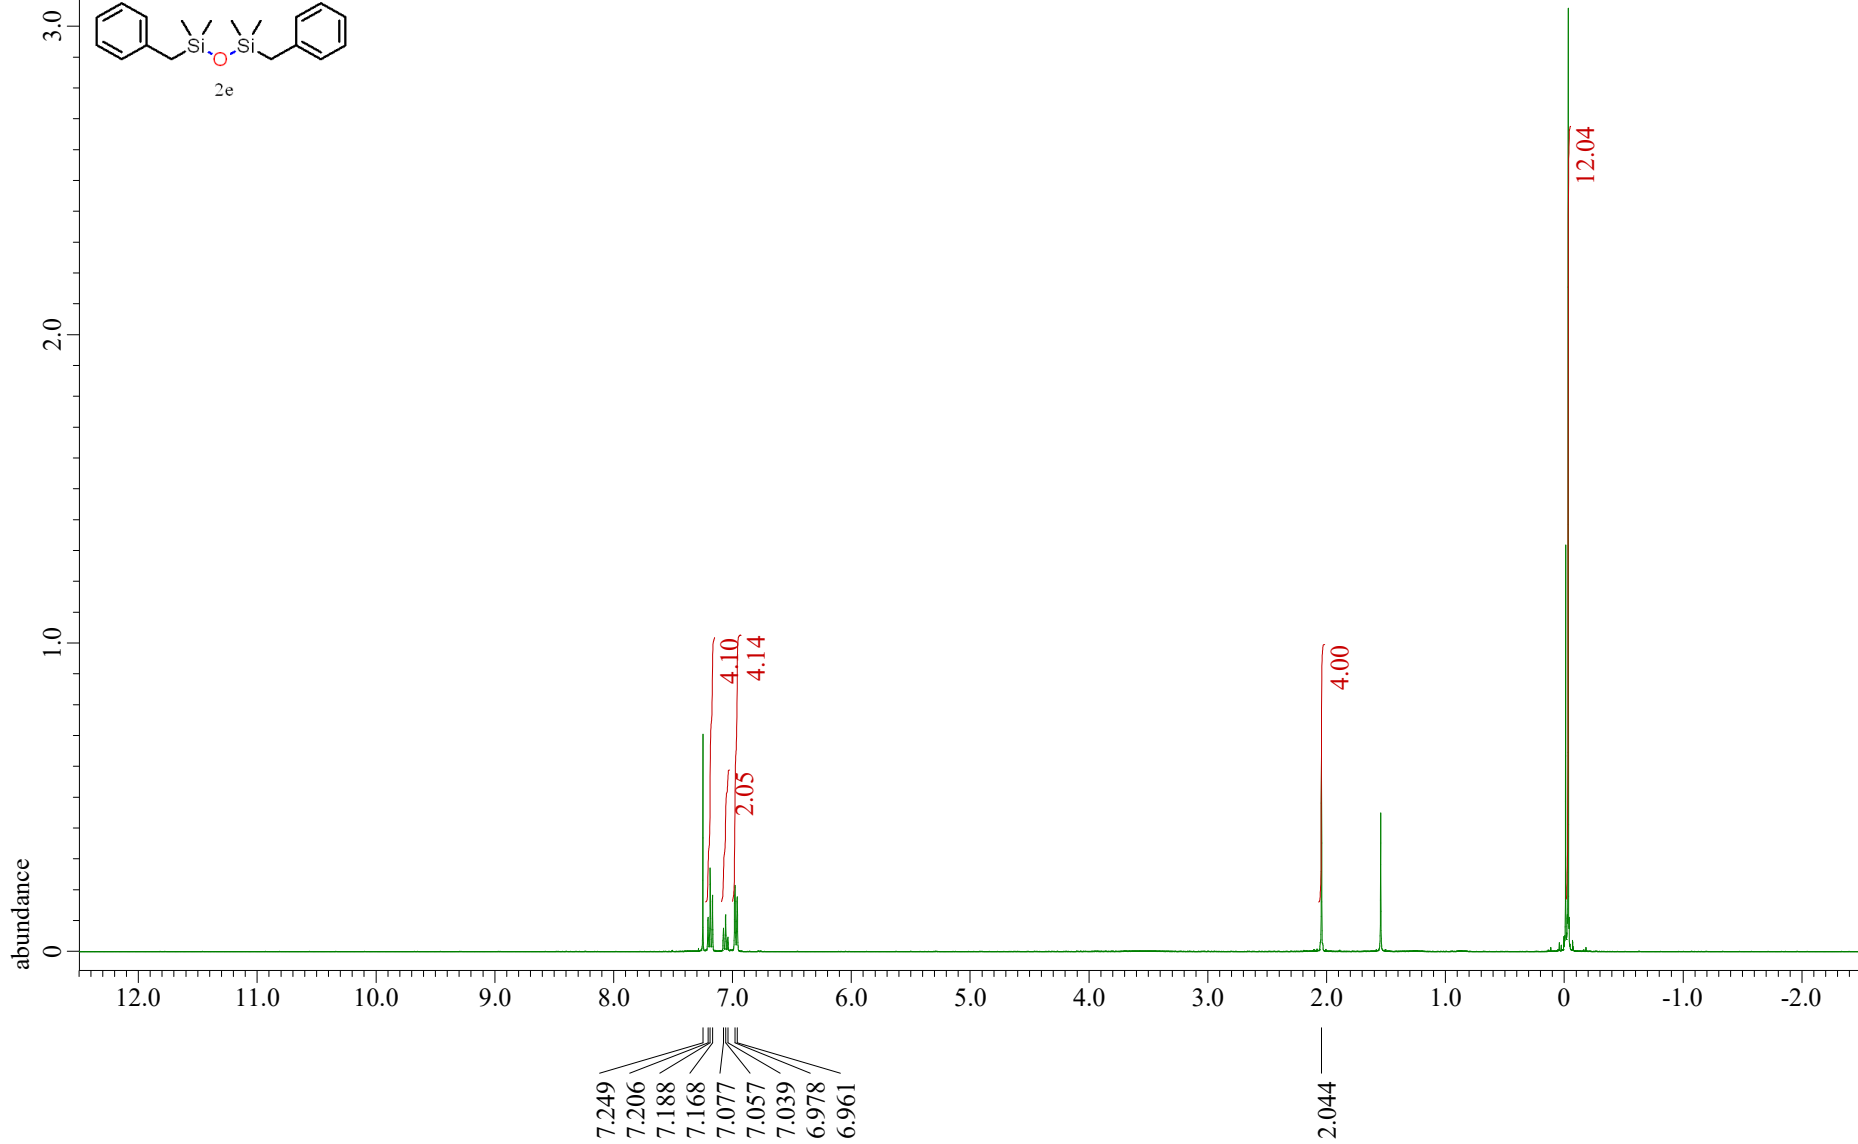

X : parts per Million : Proton

LC-222-1\_Carbon-1-3.jdf

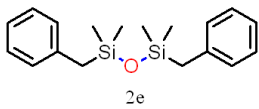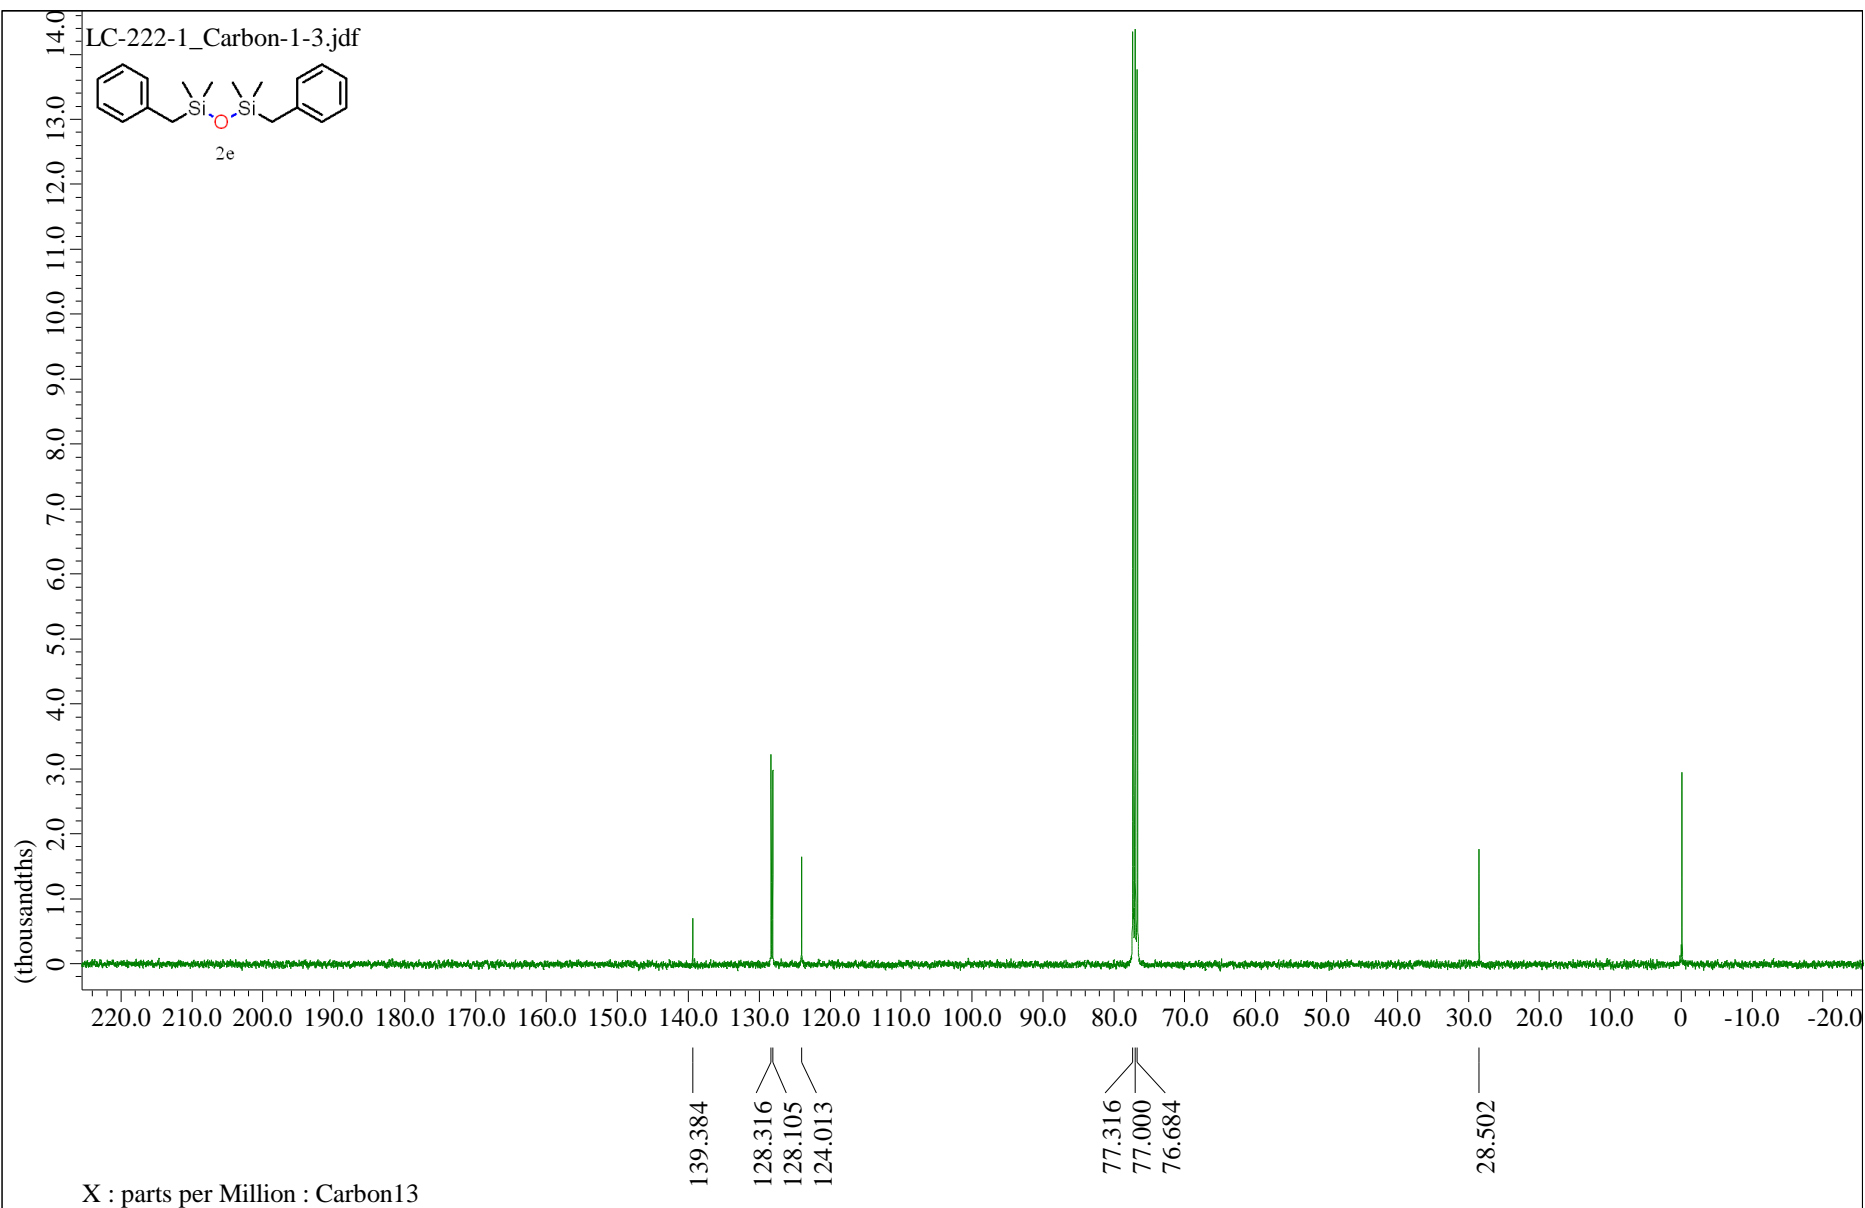

X : parts per Million : Carbon13

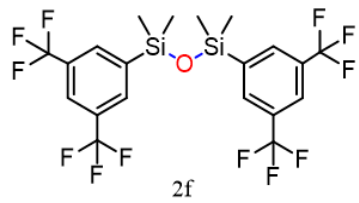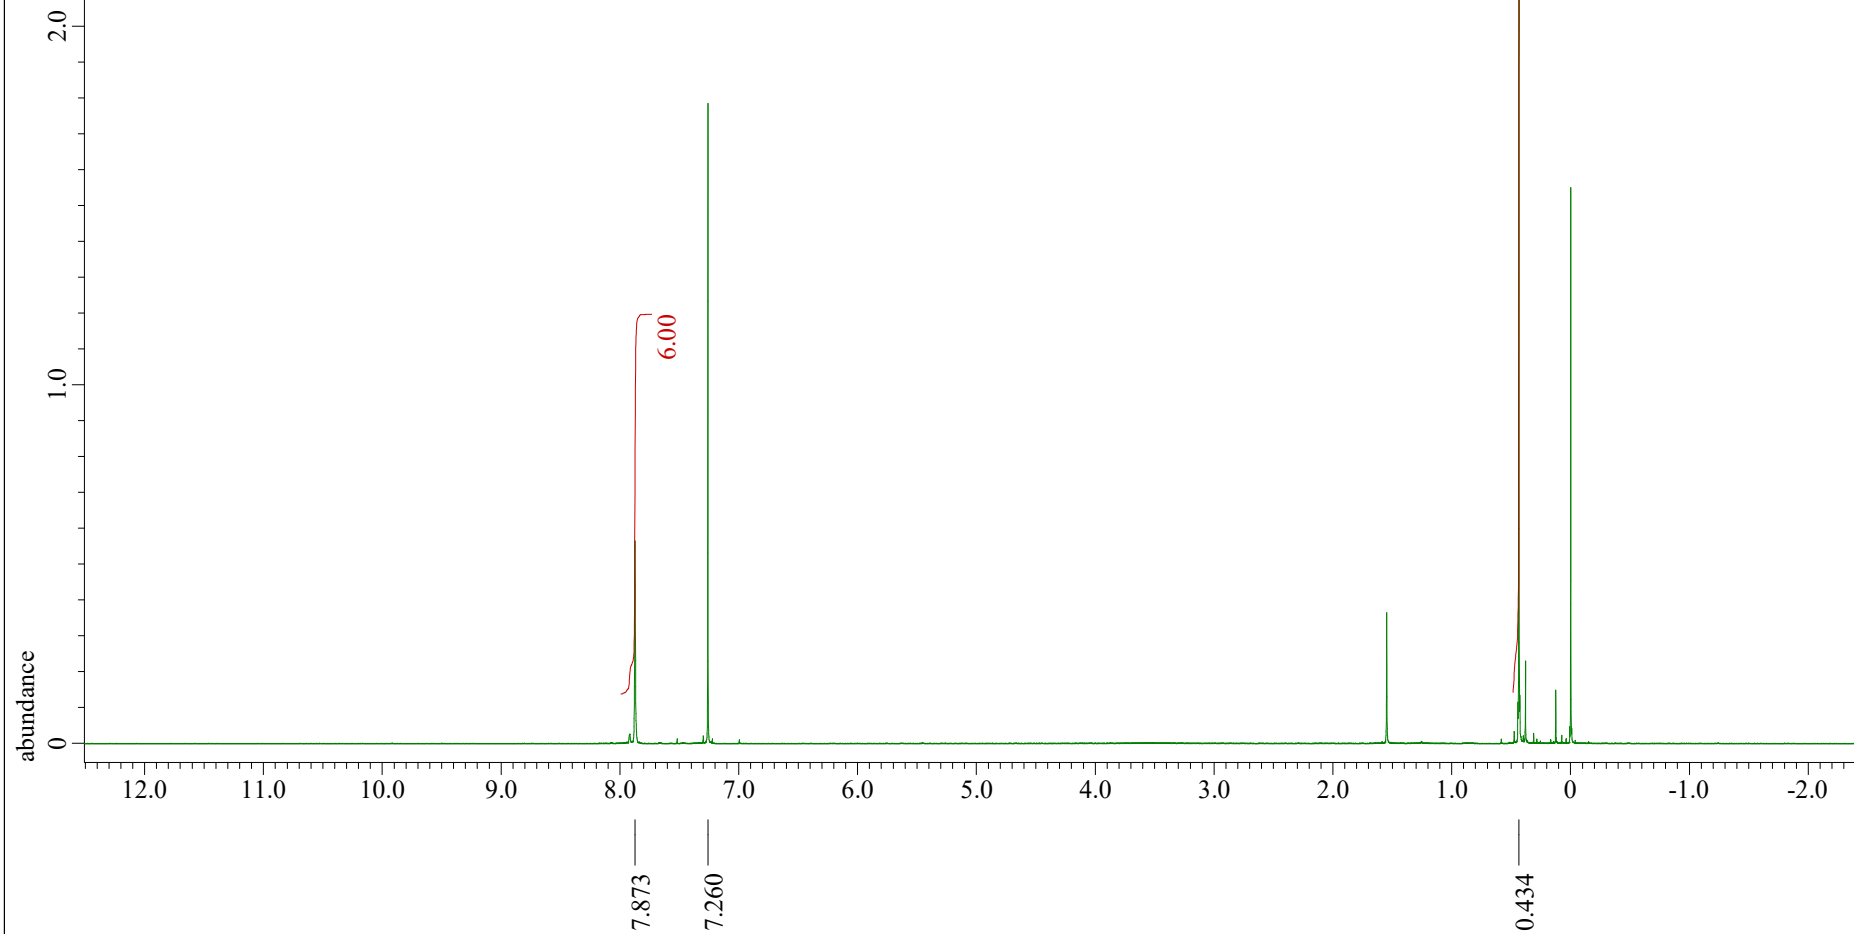

X : parts per Million : Proton

LC-228-C1\_Carbon-1-3.jdf

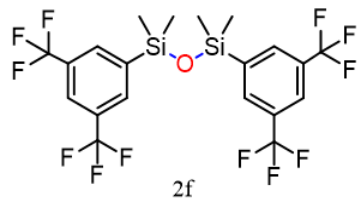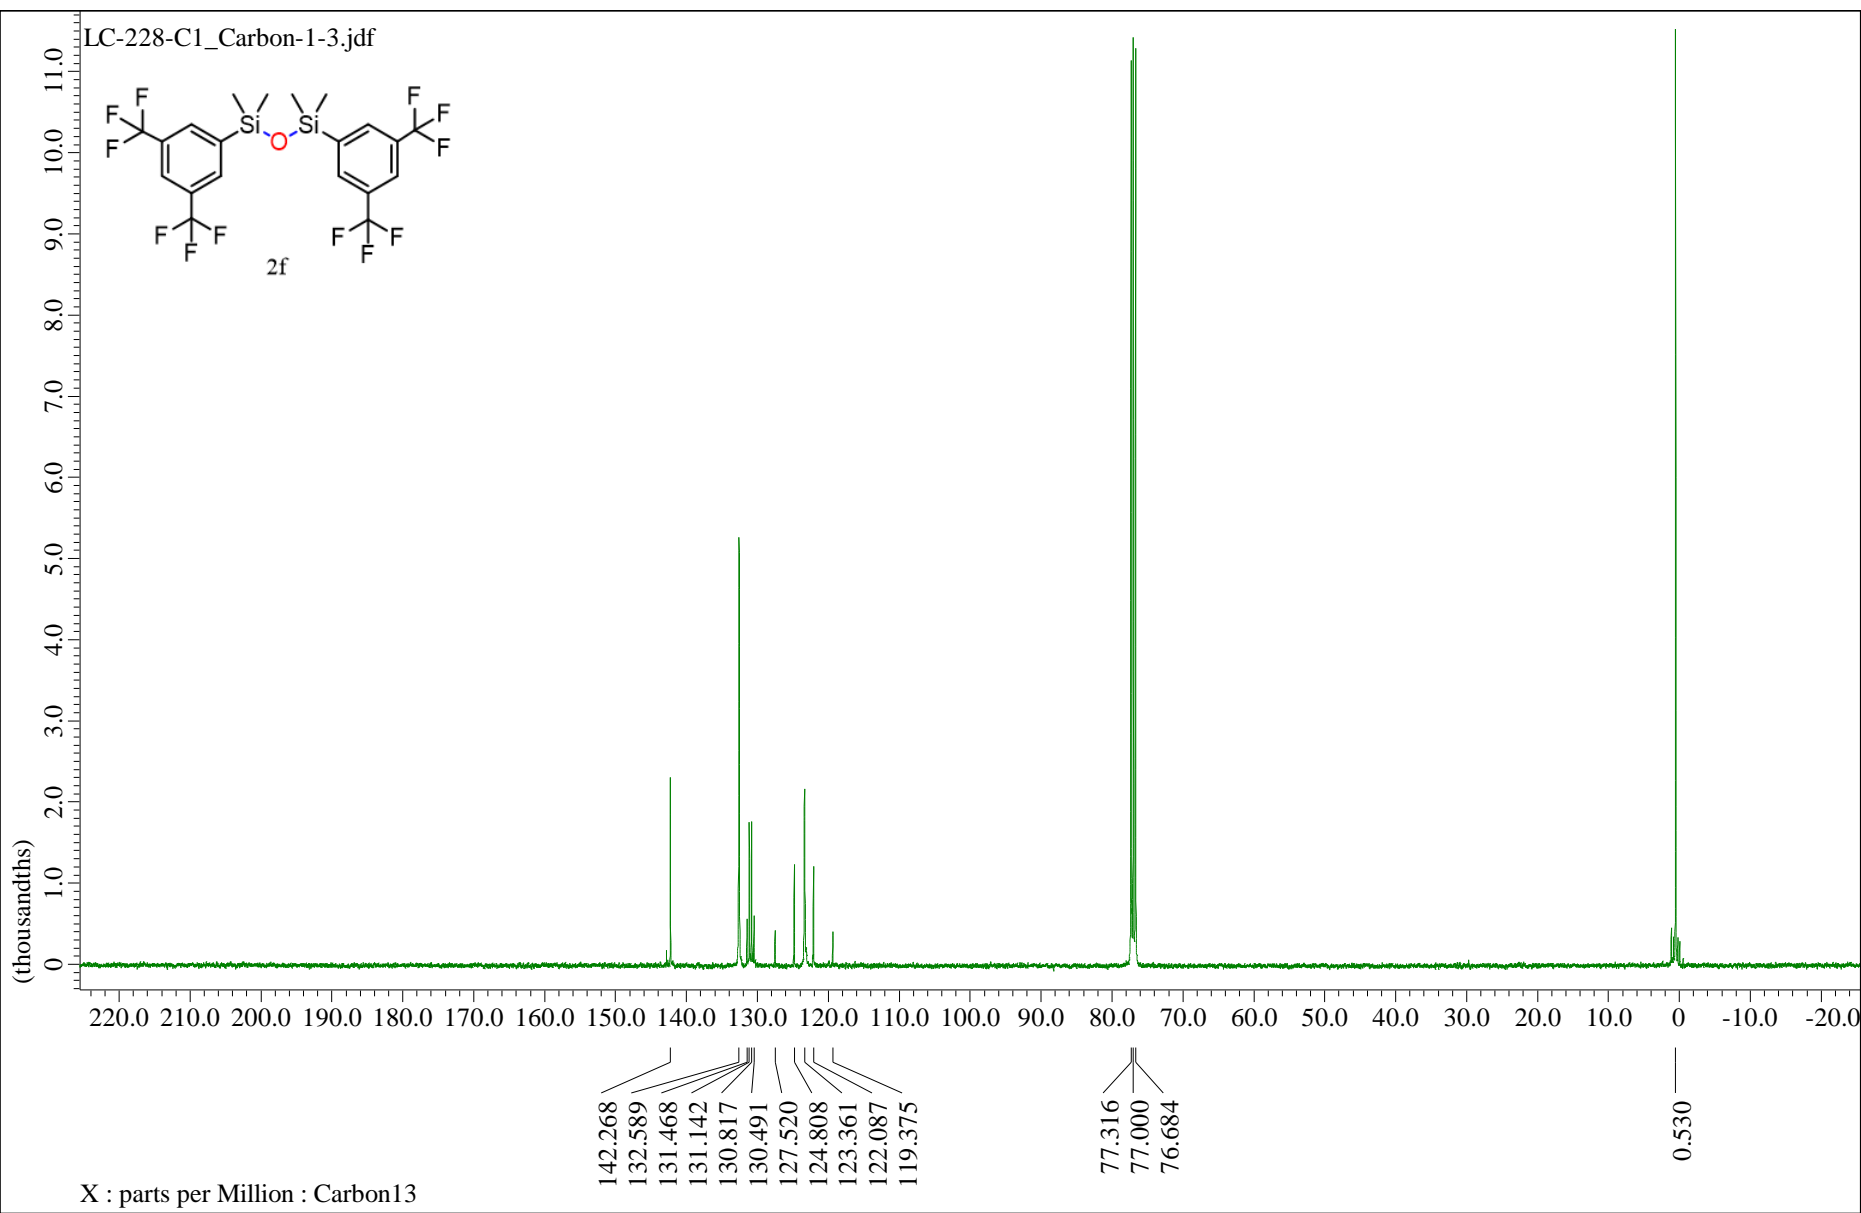

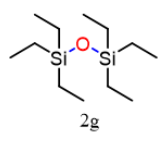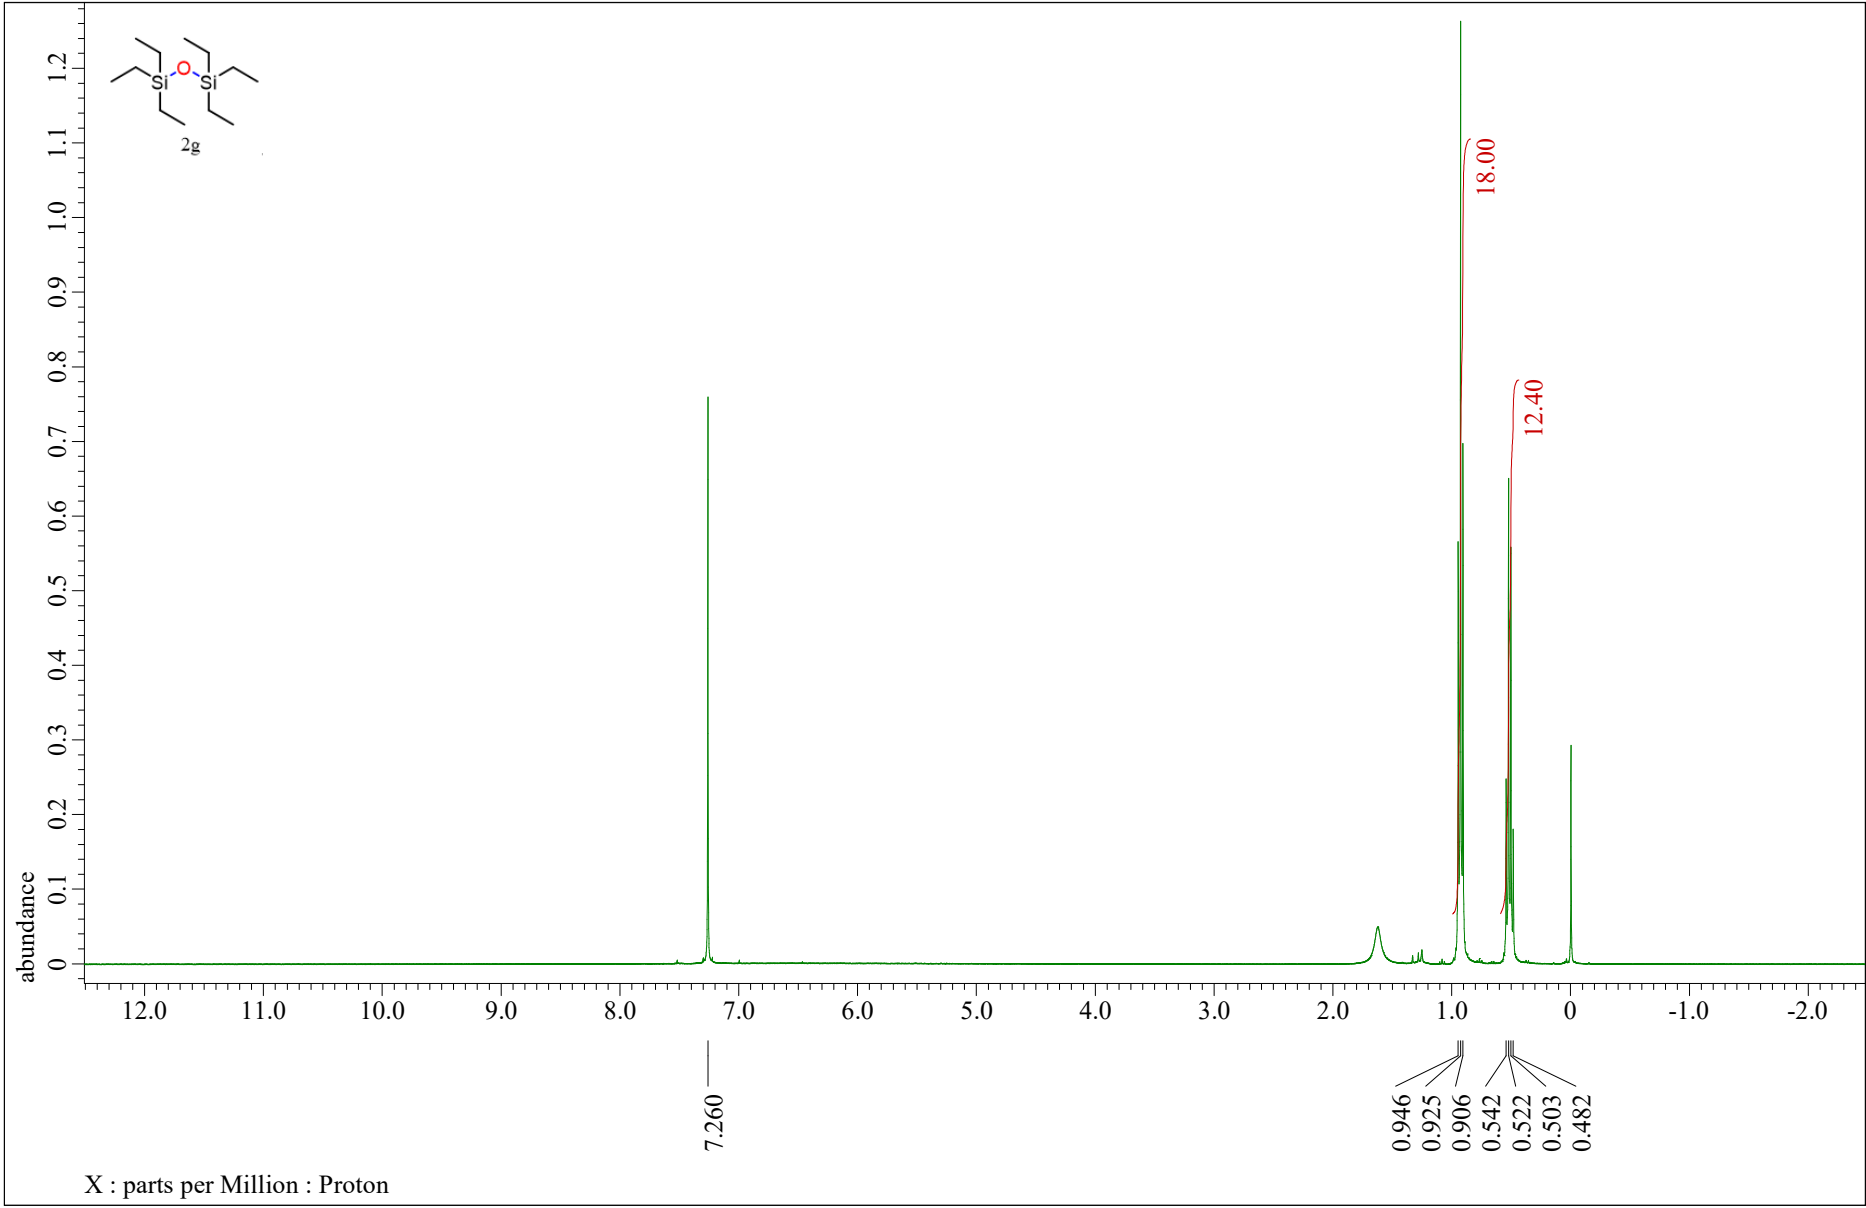

LT-SI\_Carbon-1-3.jdf

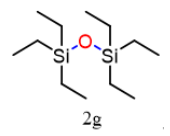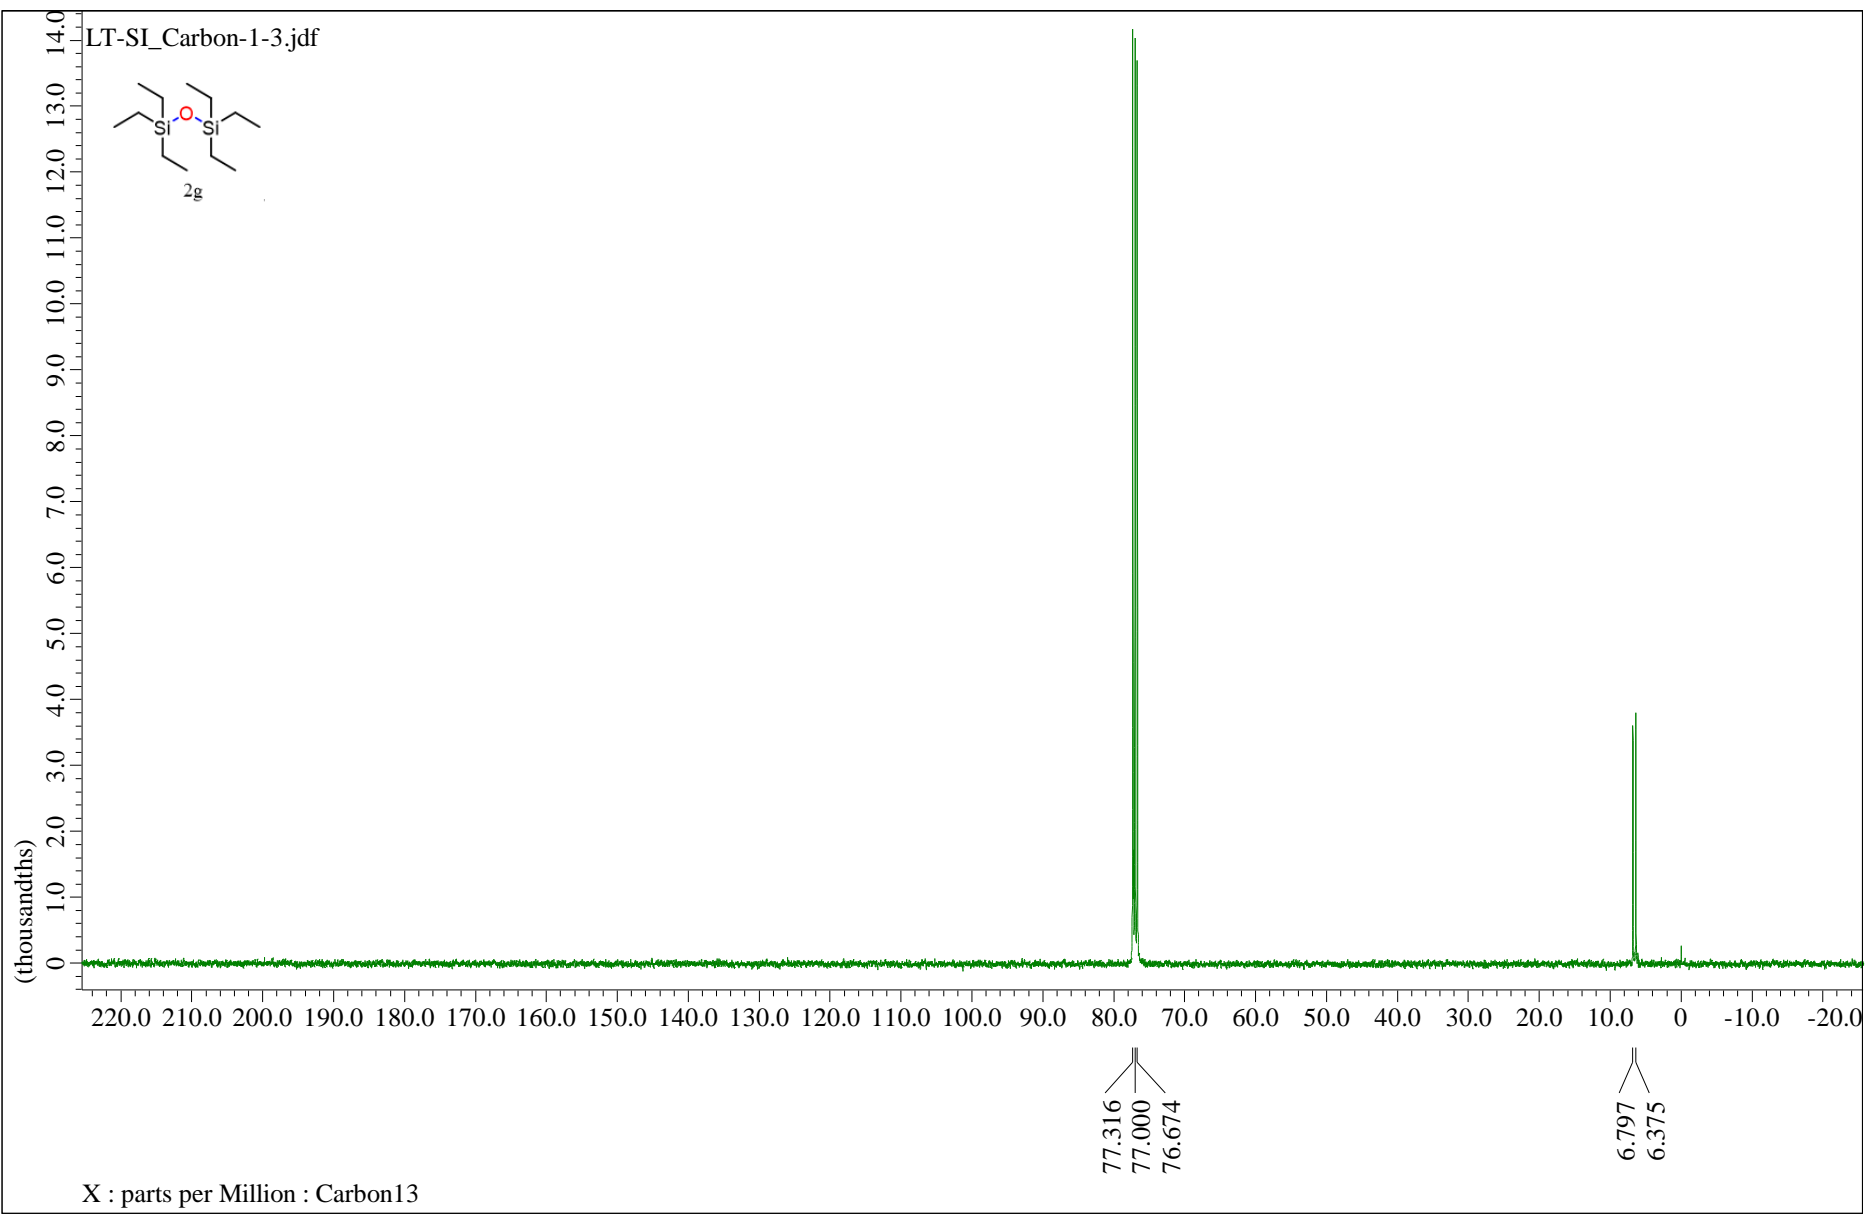

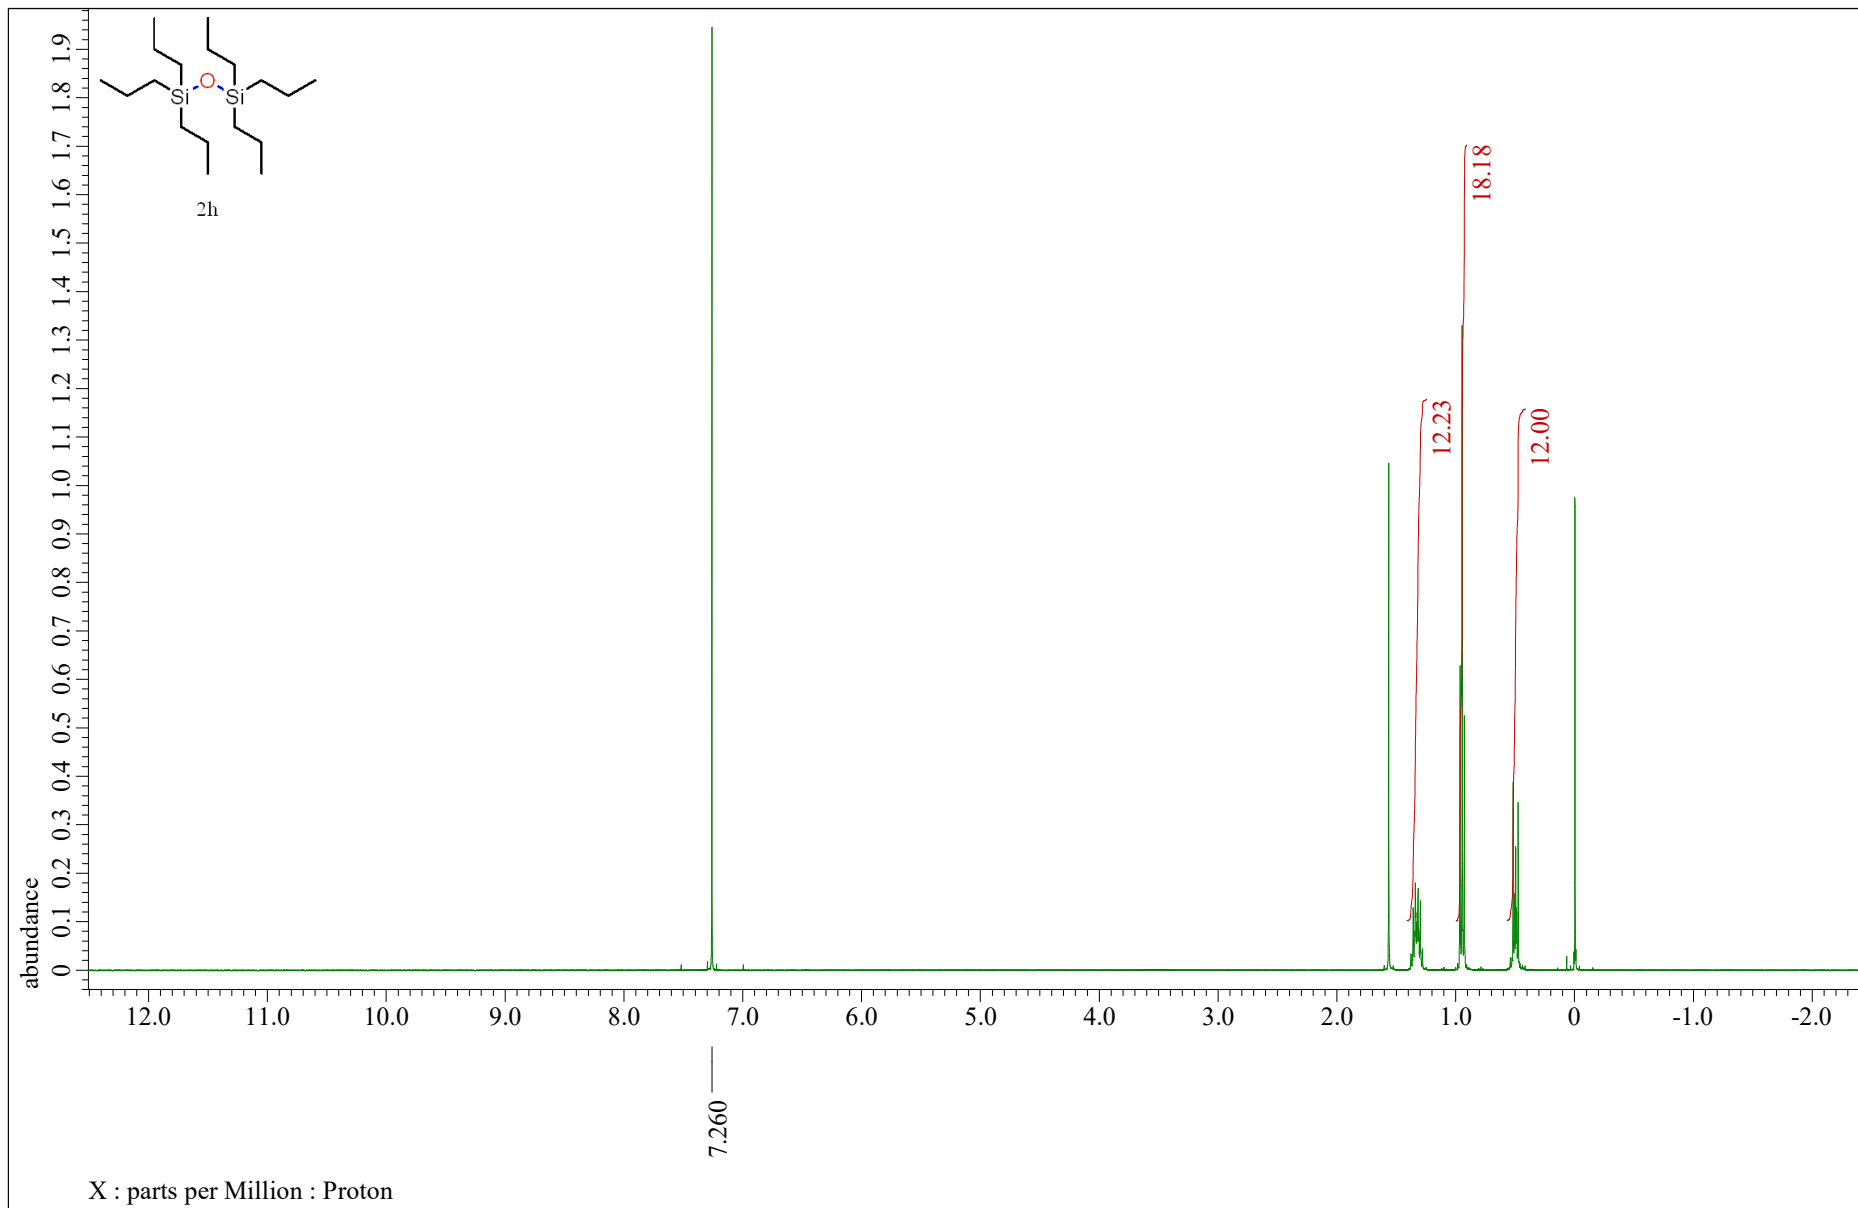

LC-230-2\_Carbon-1-3.jdf

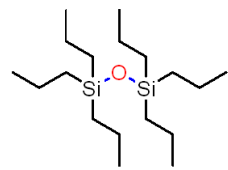

2h

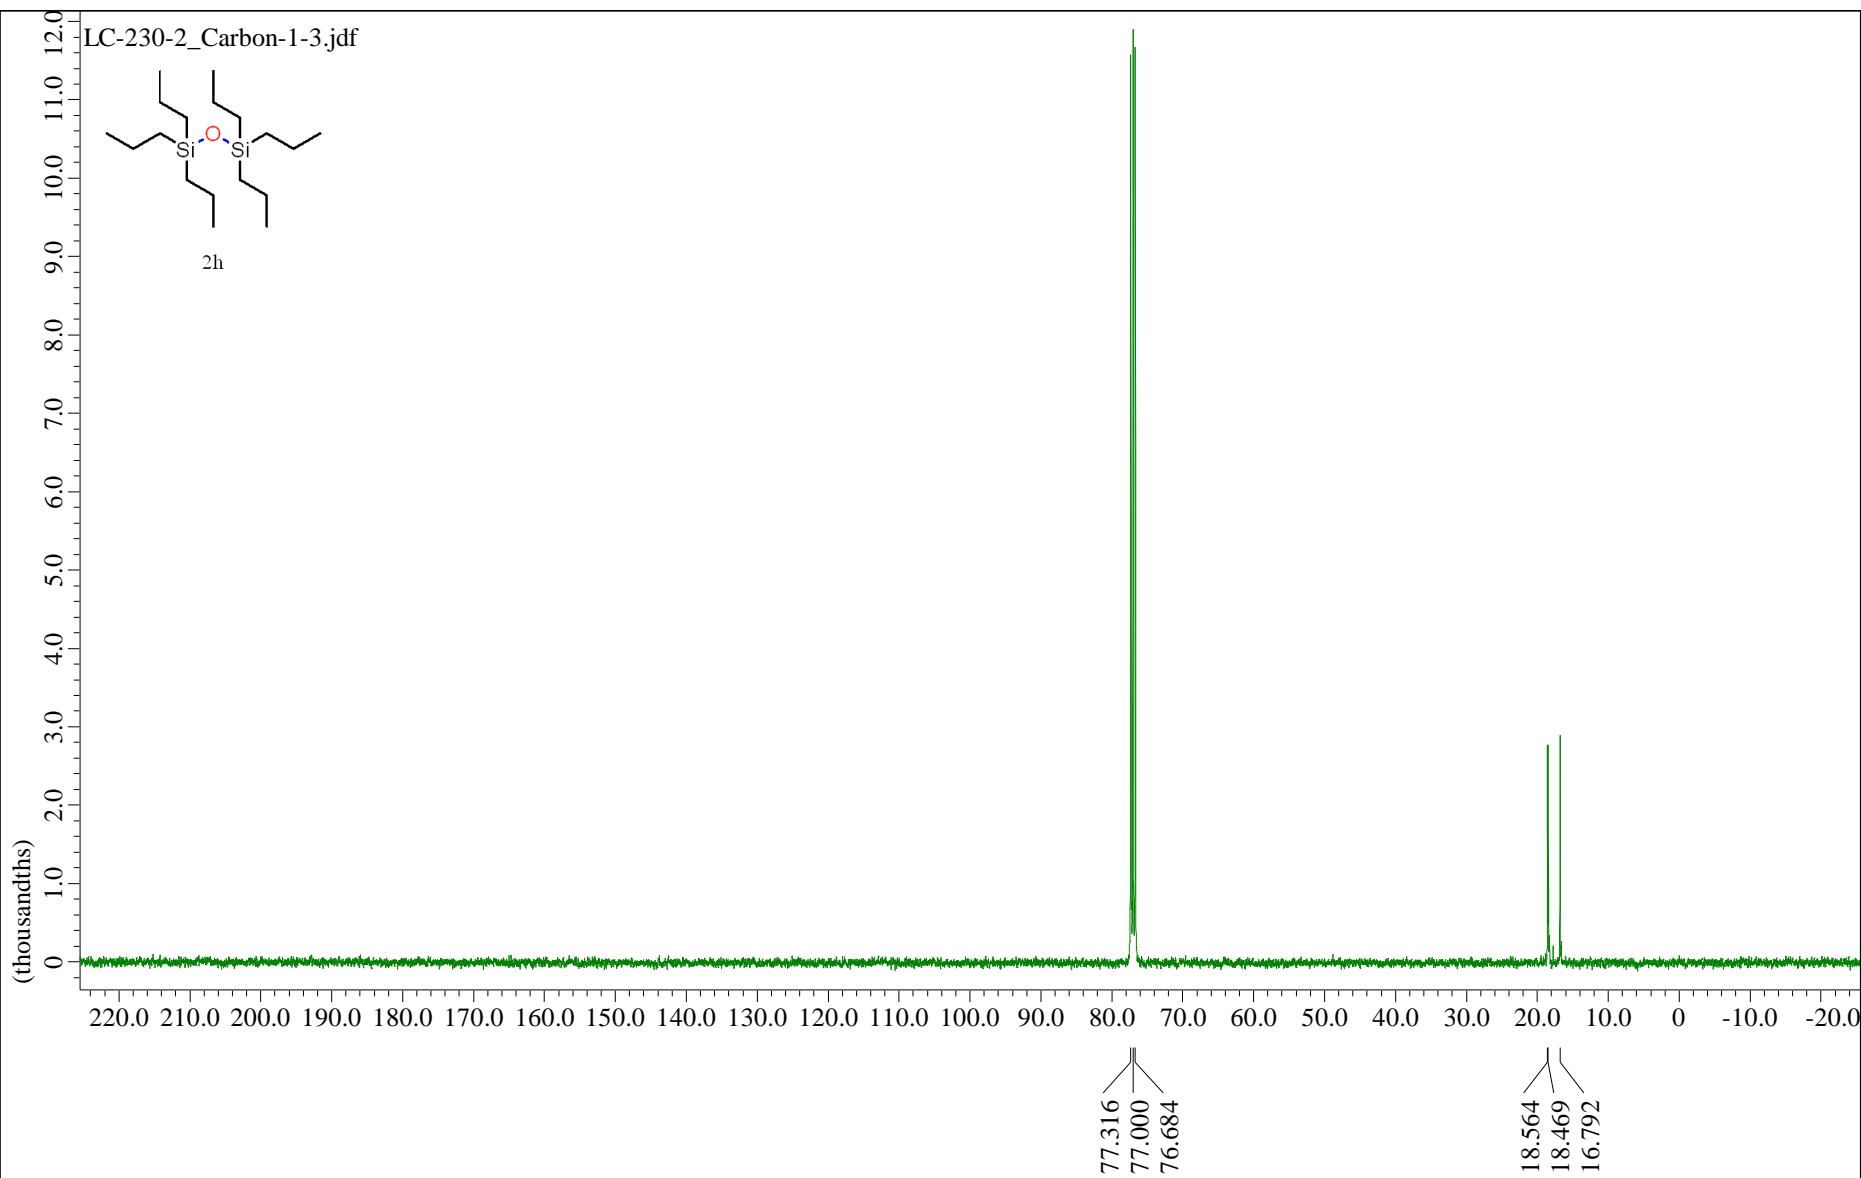

X : parts per Million : Carbon13



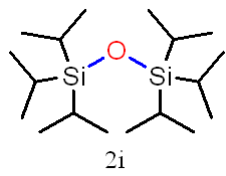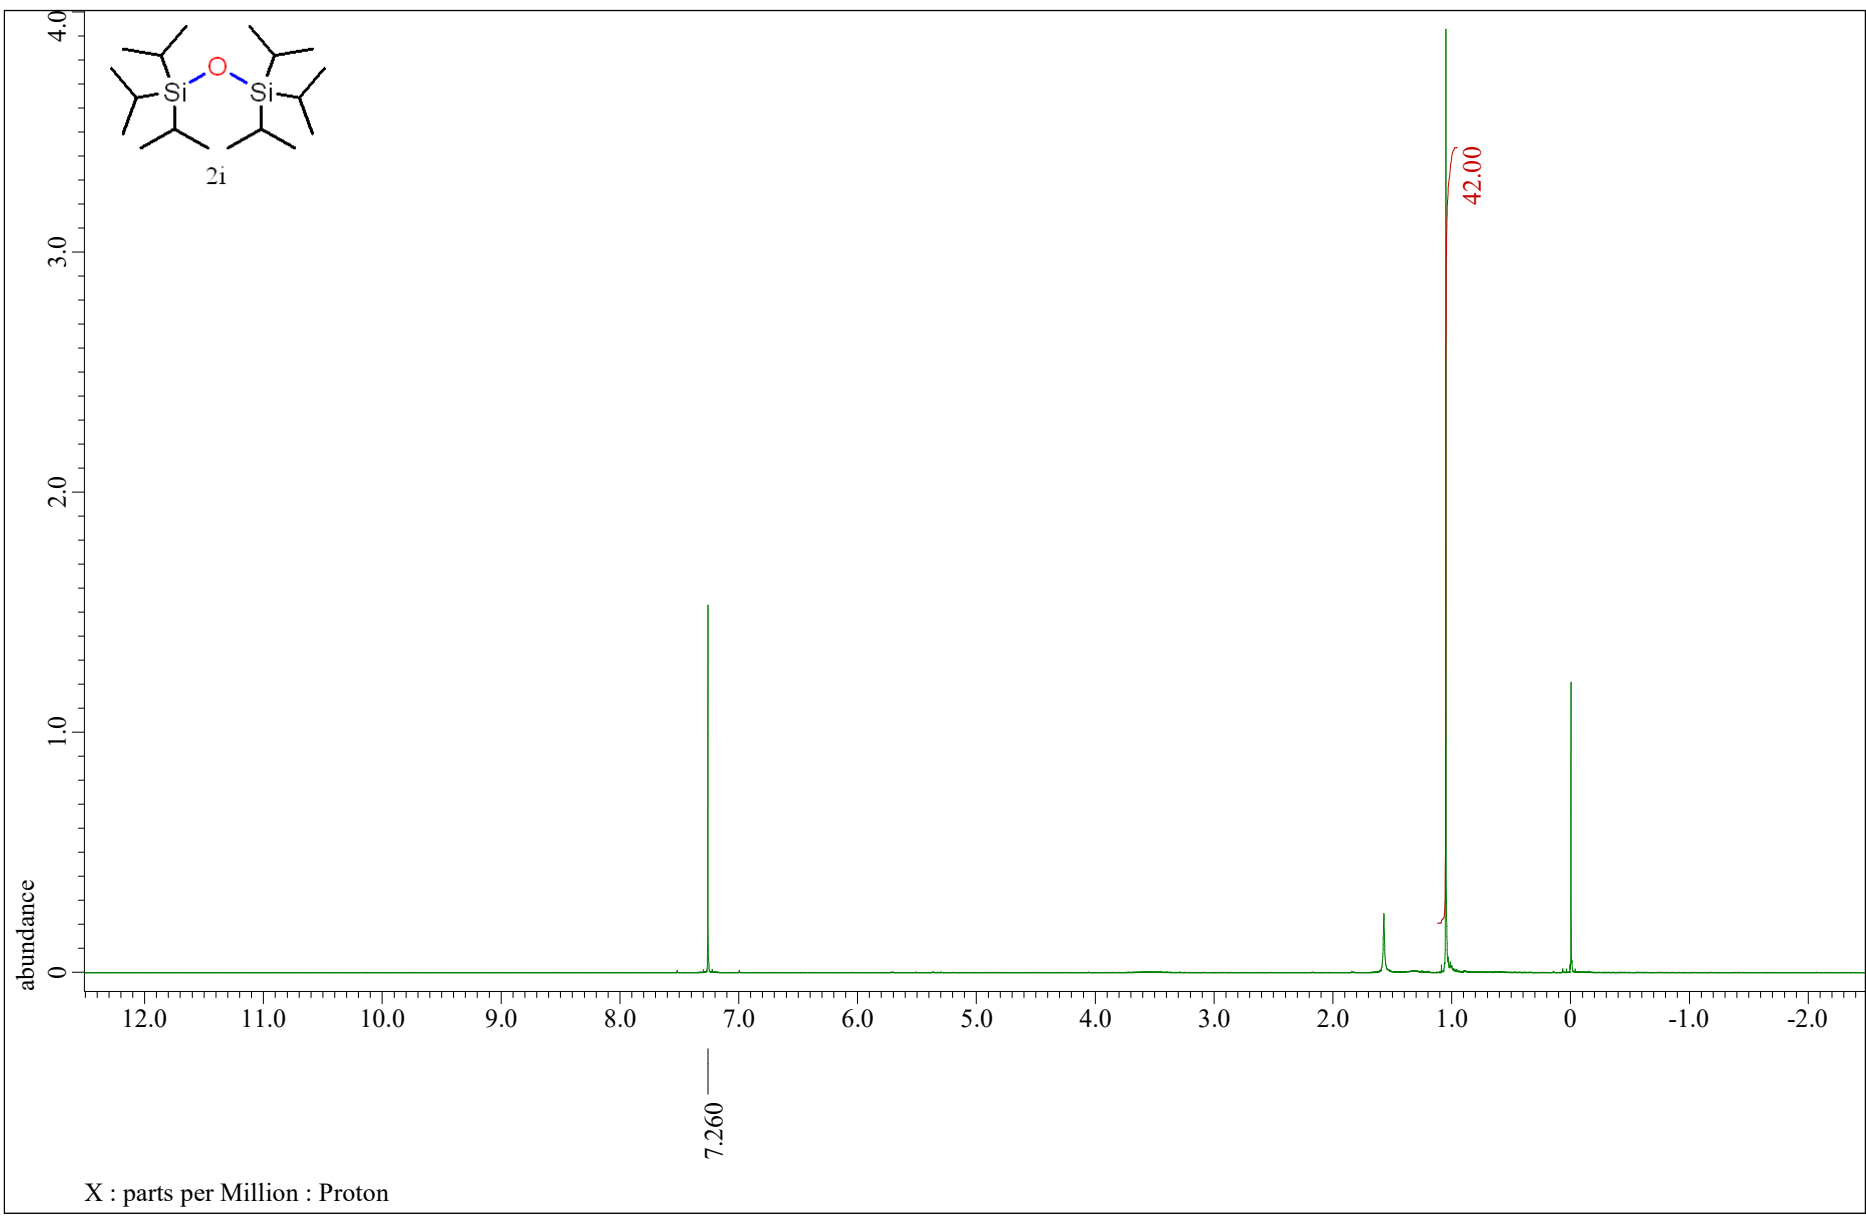

LC-336-3\_Carbon-1-3.jdf

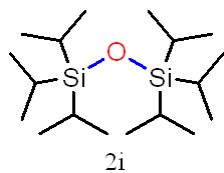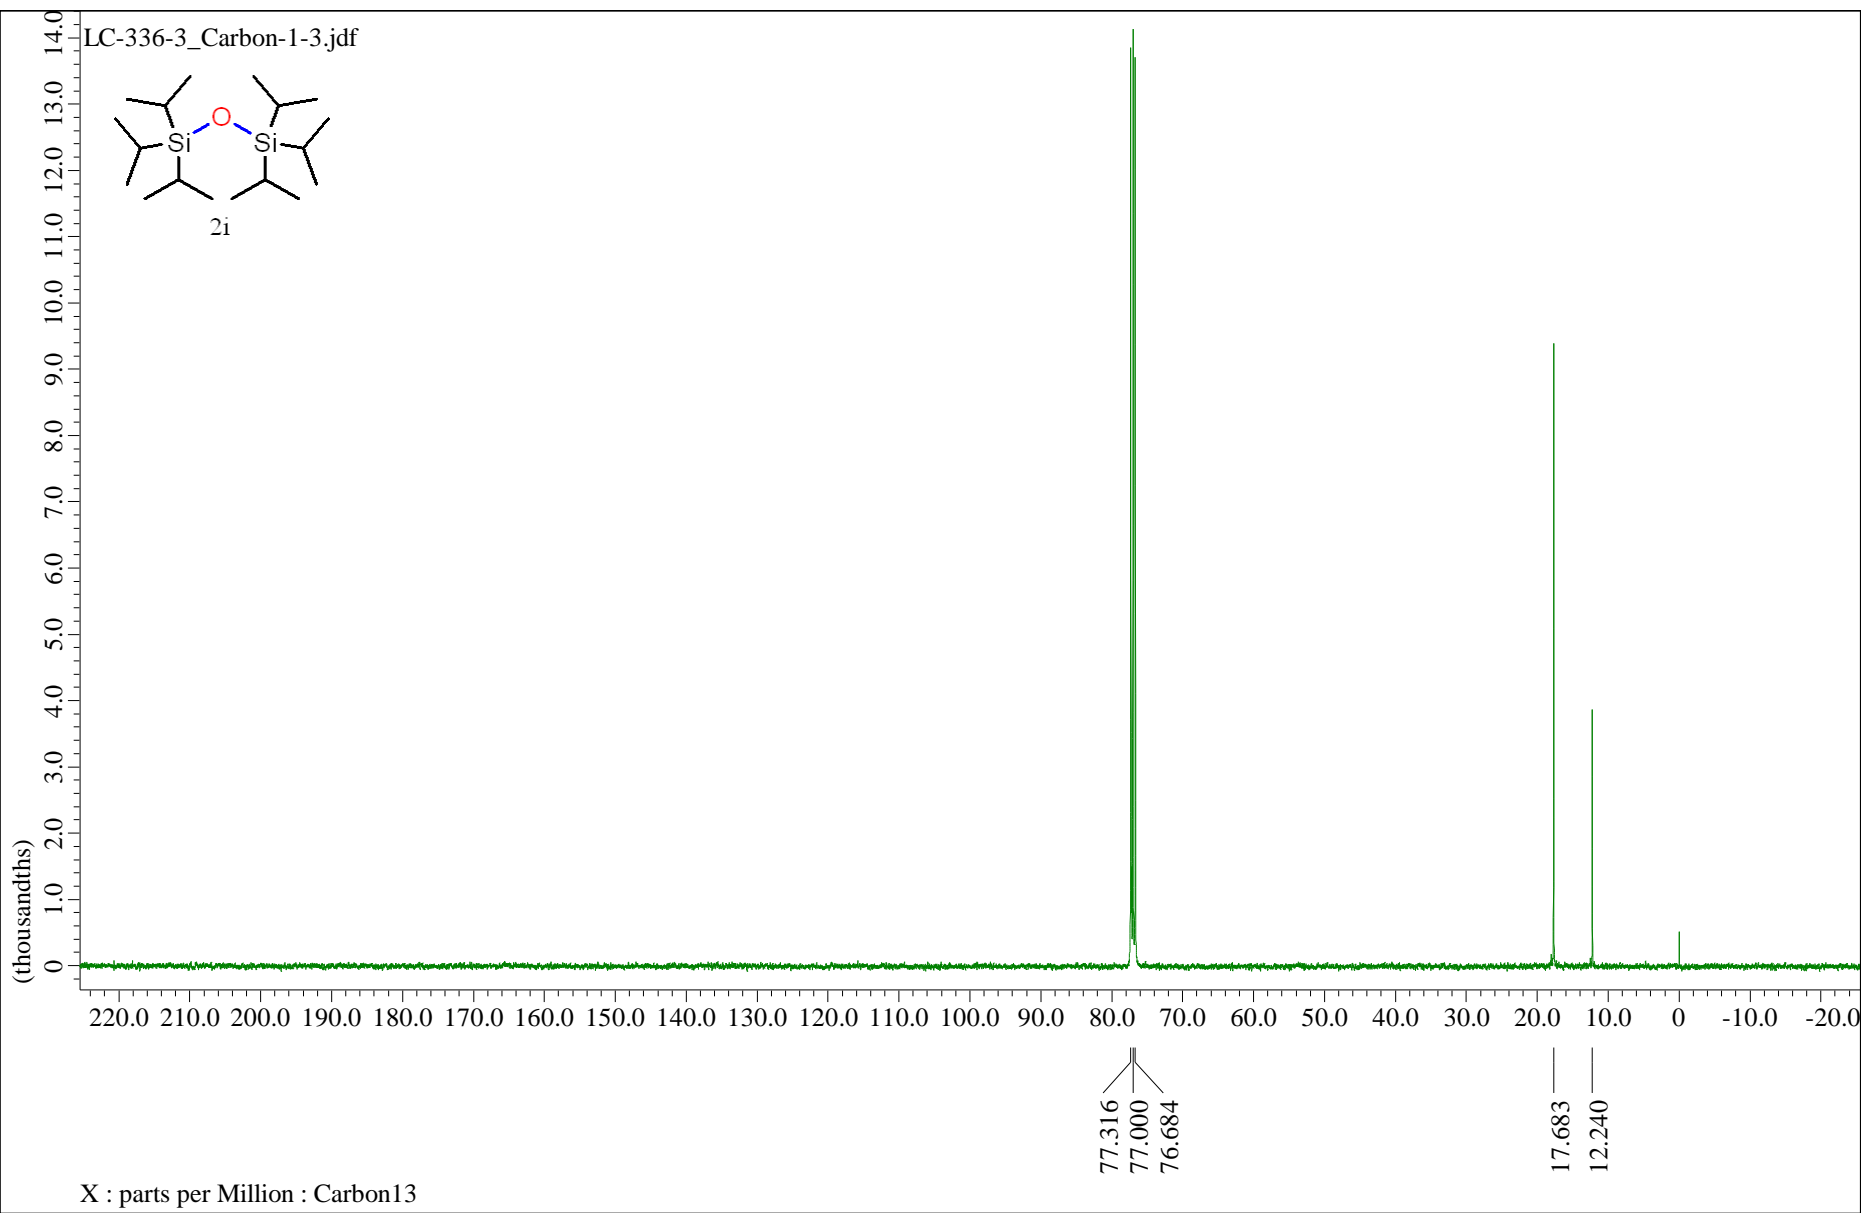

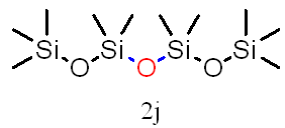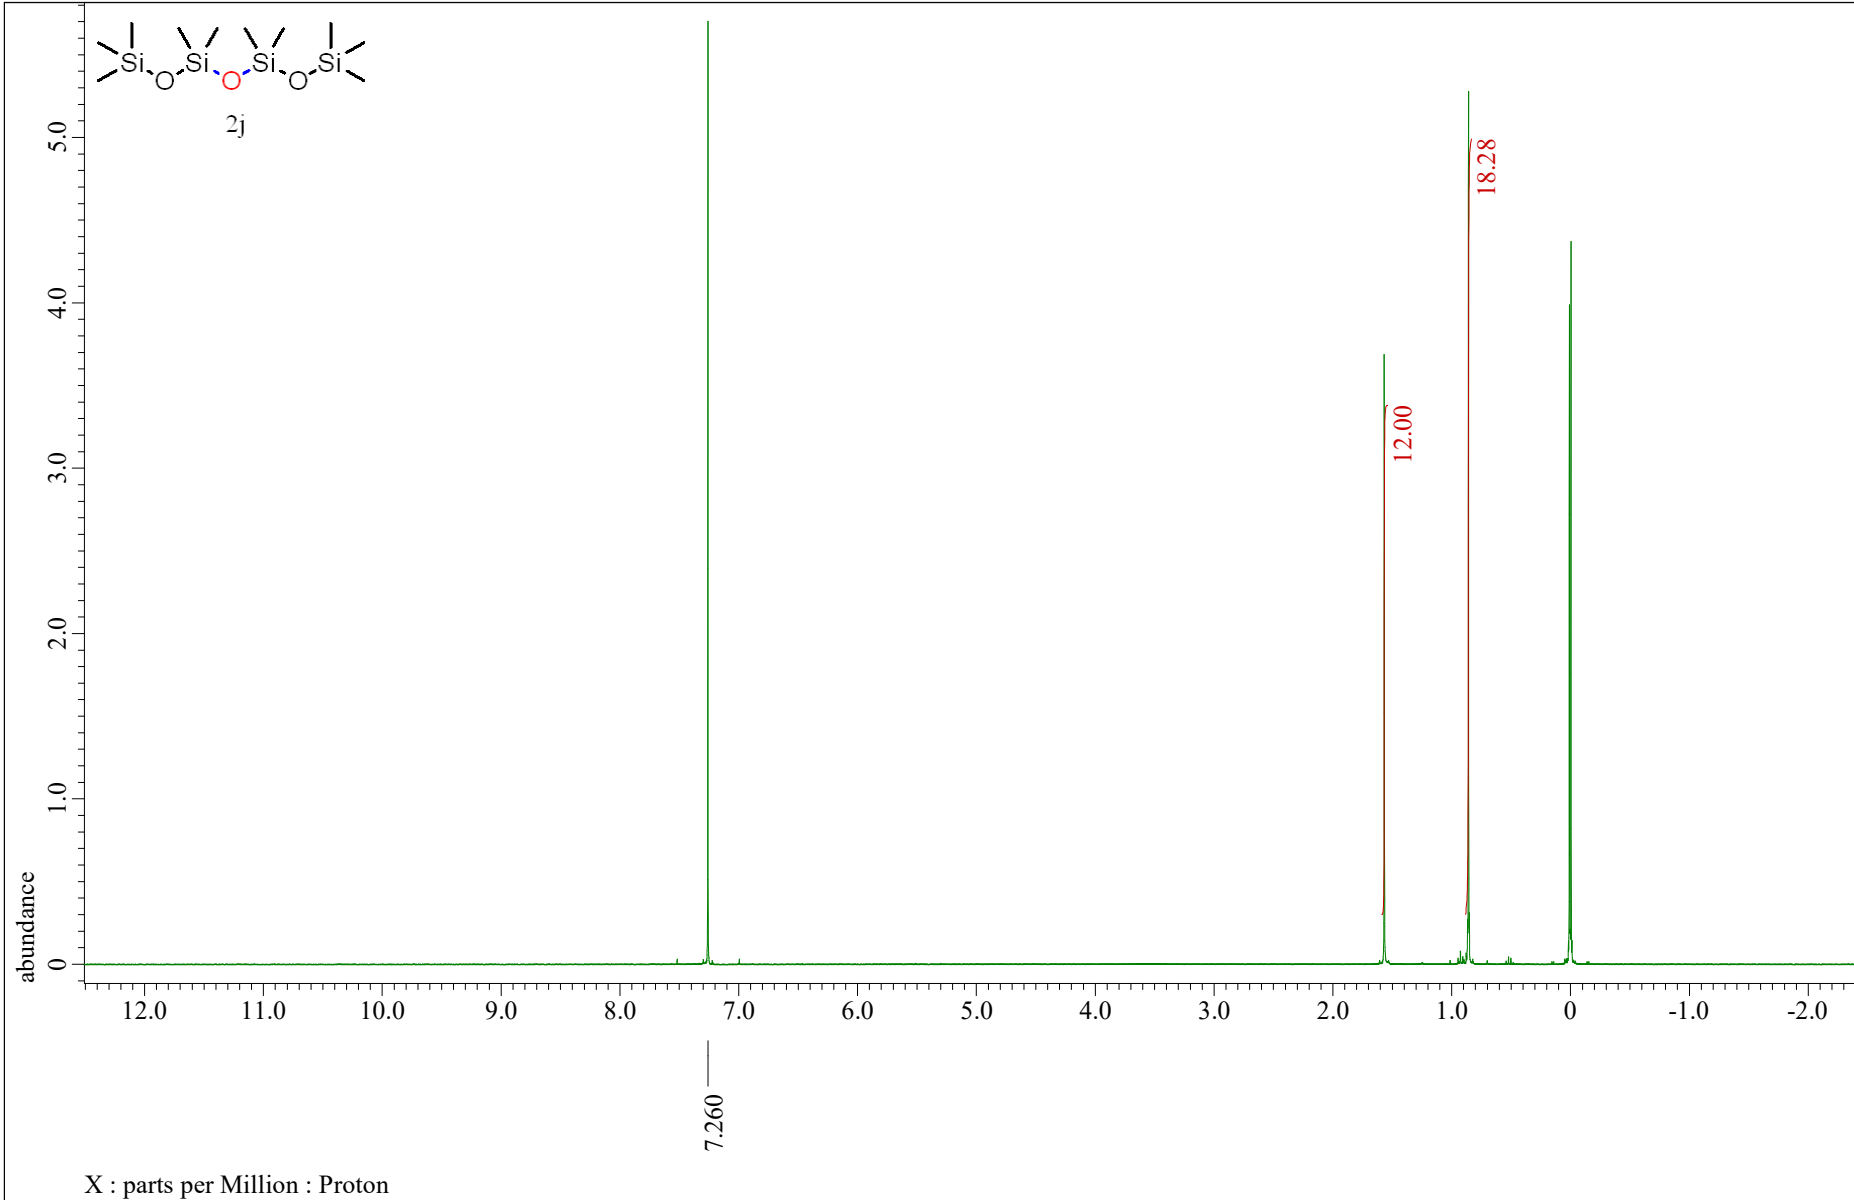

LC-379-6\_Carbon-1-3.jdf

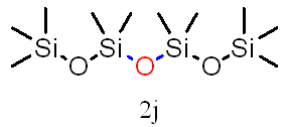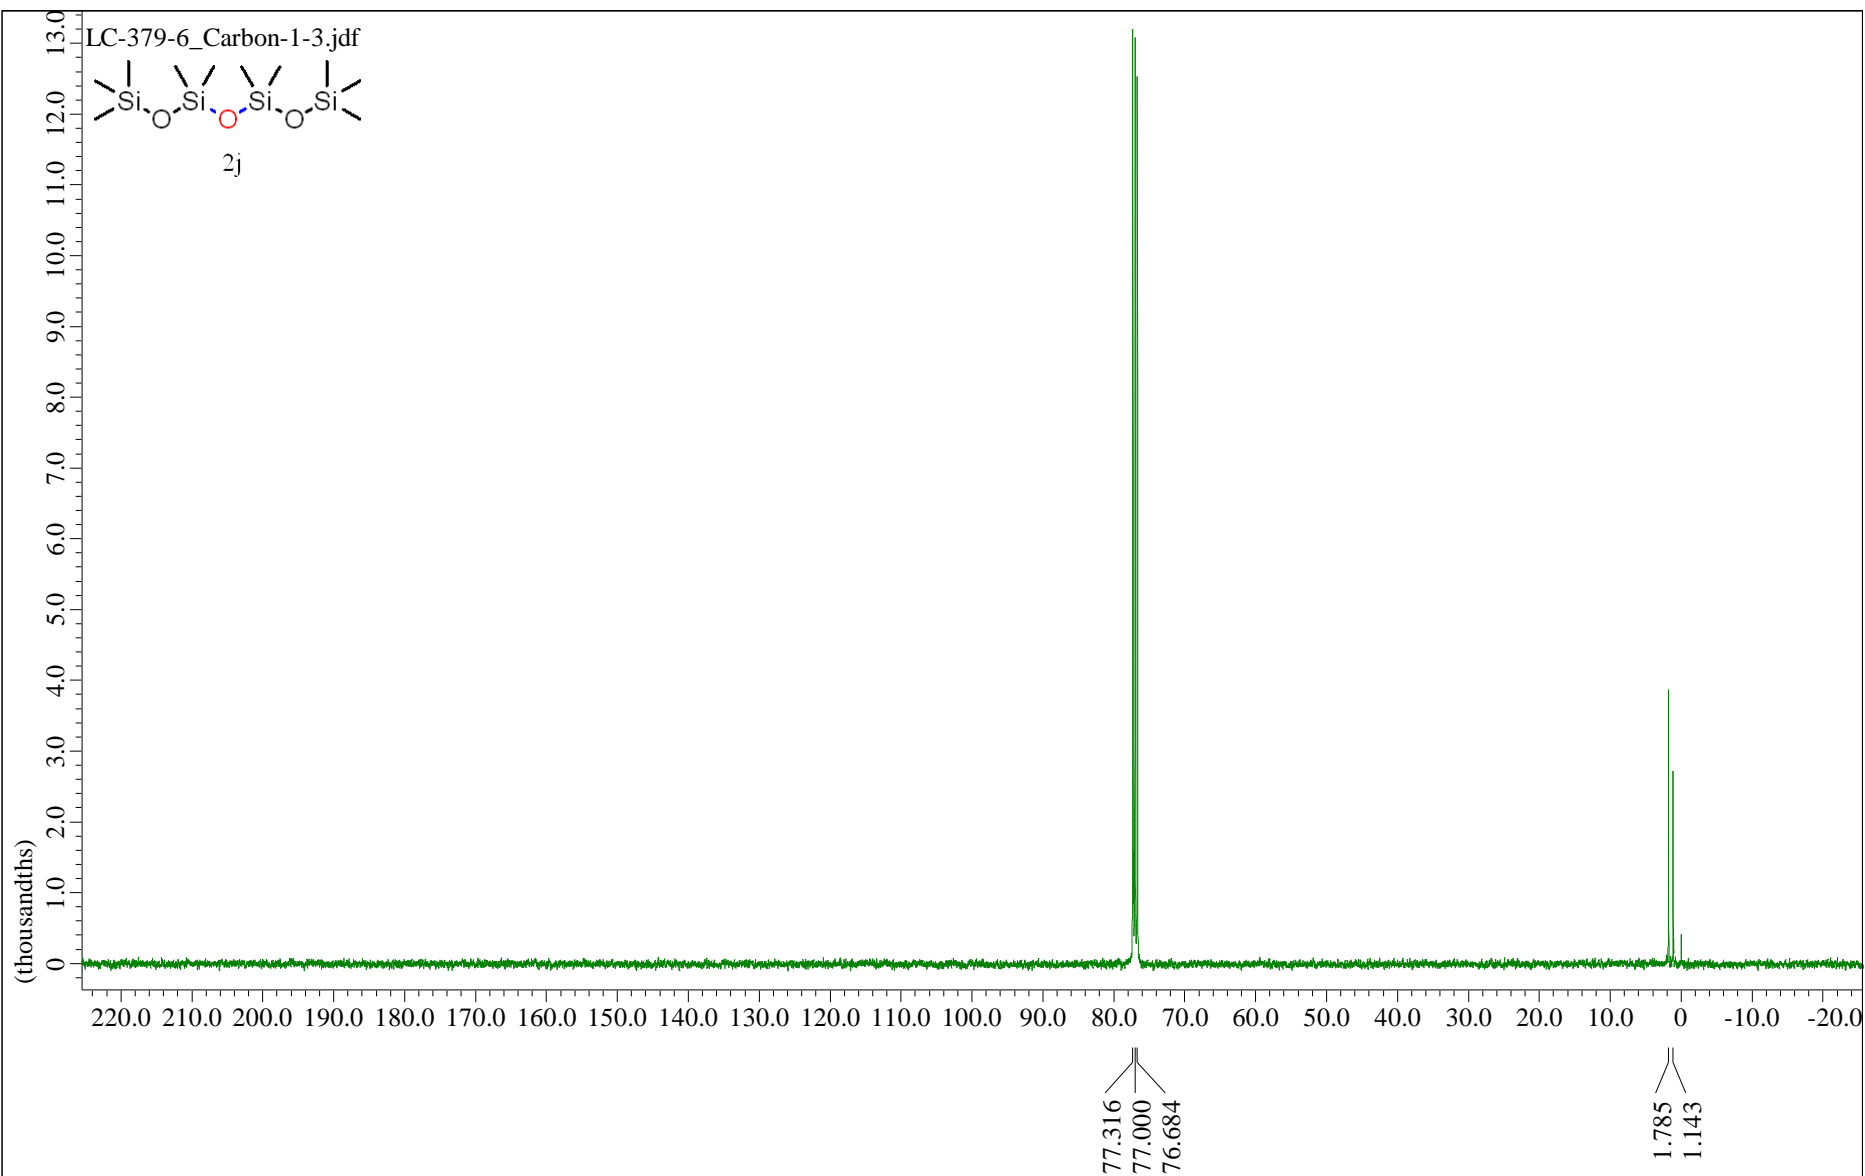

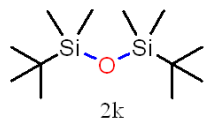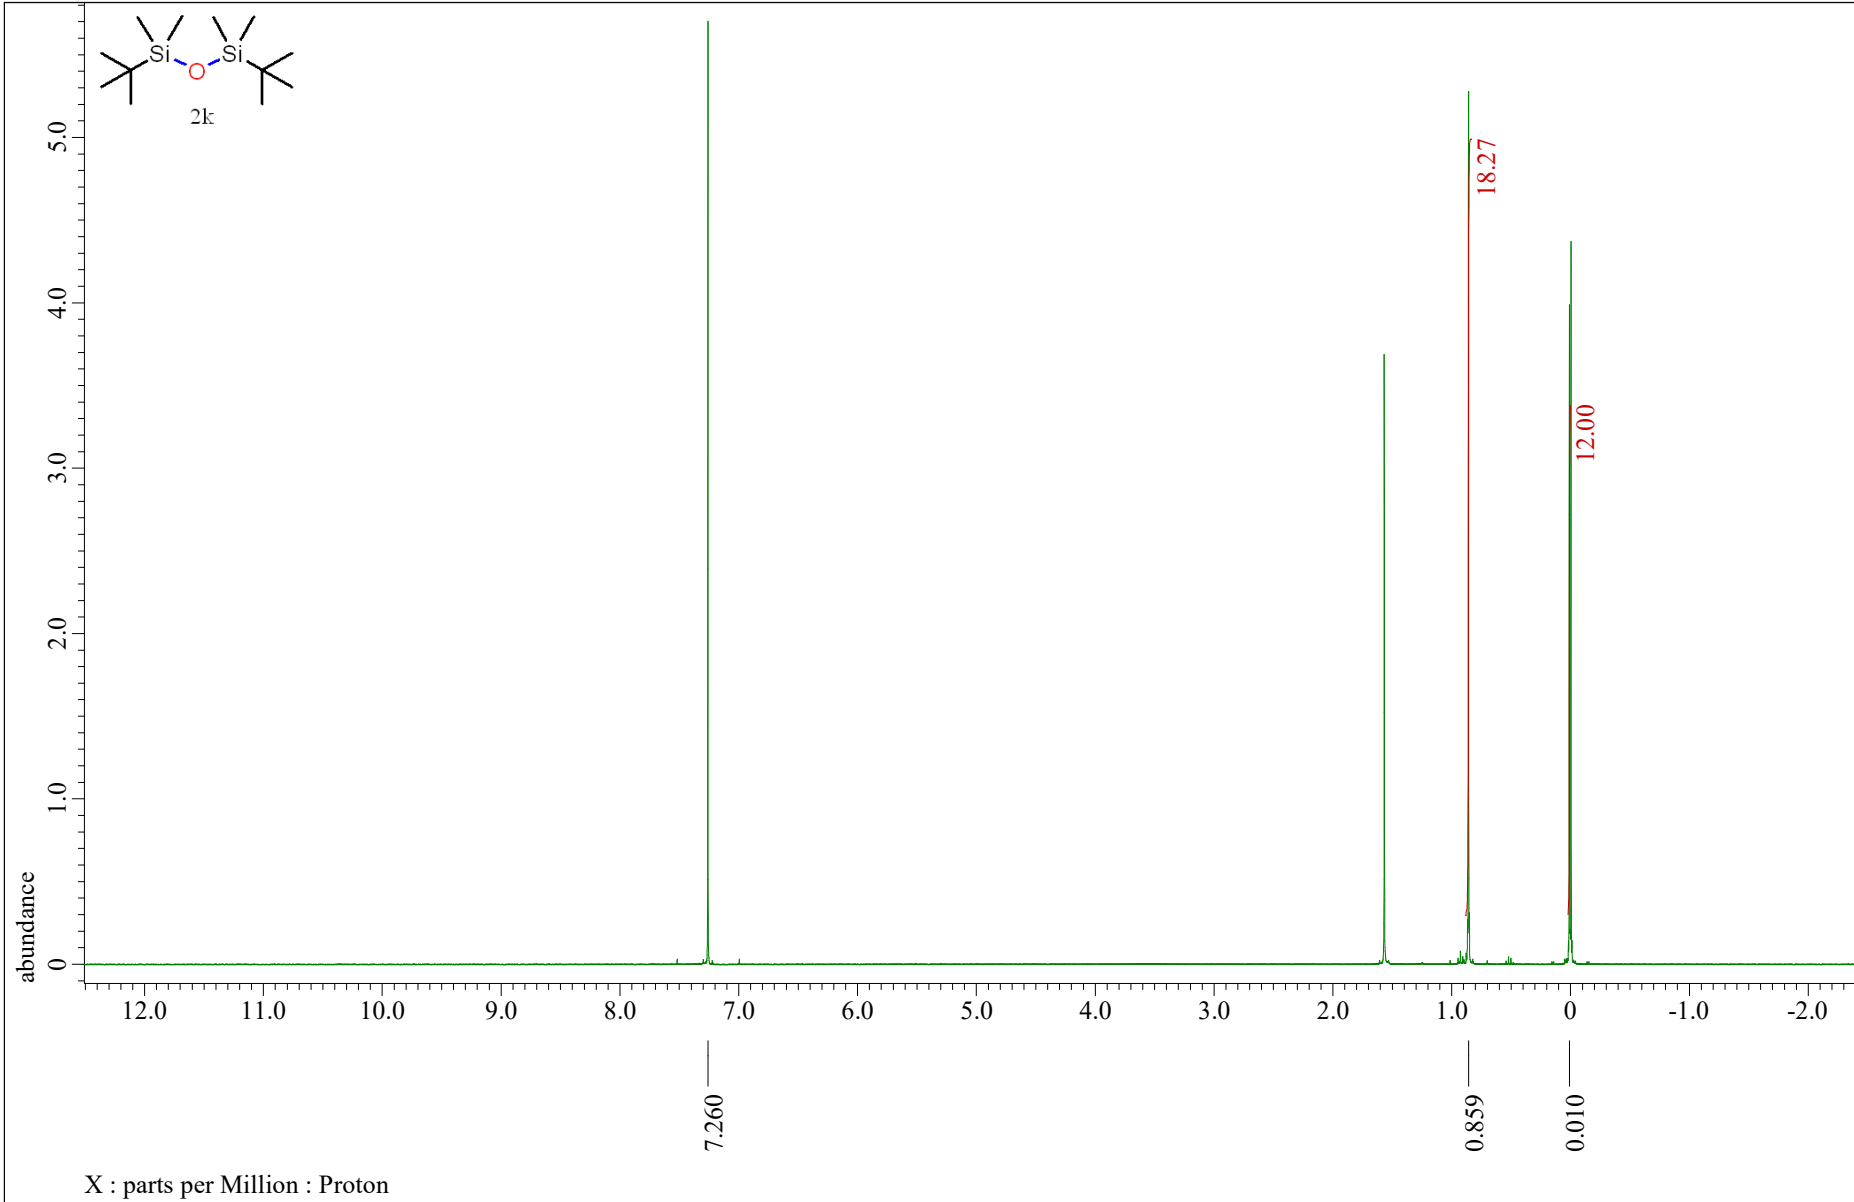

LC-337-C3\_Carbon-1-3.jdf

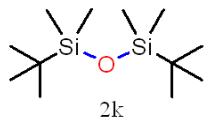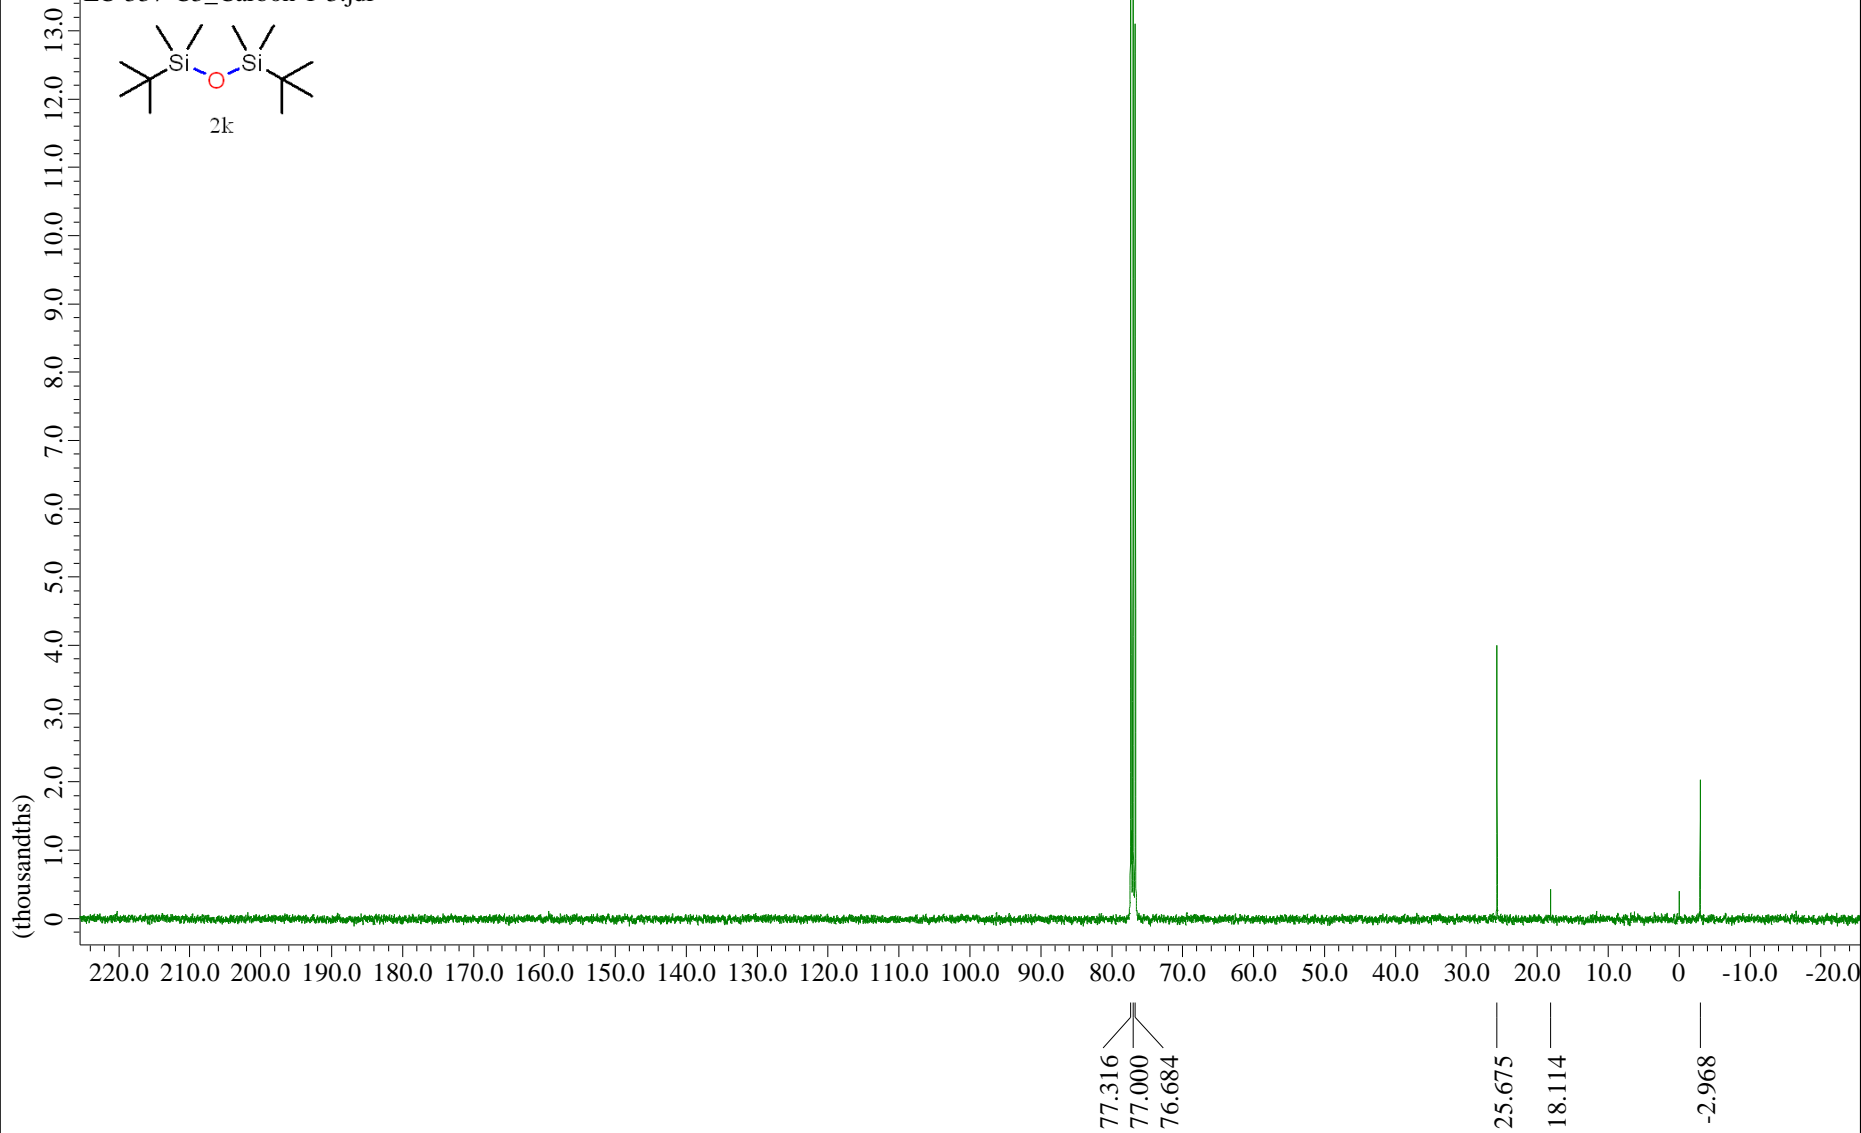

X : parts per Million : Carbon13

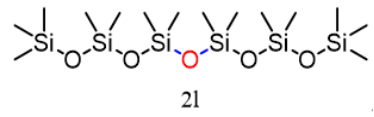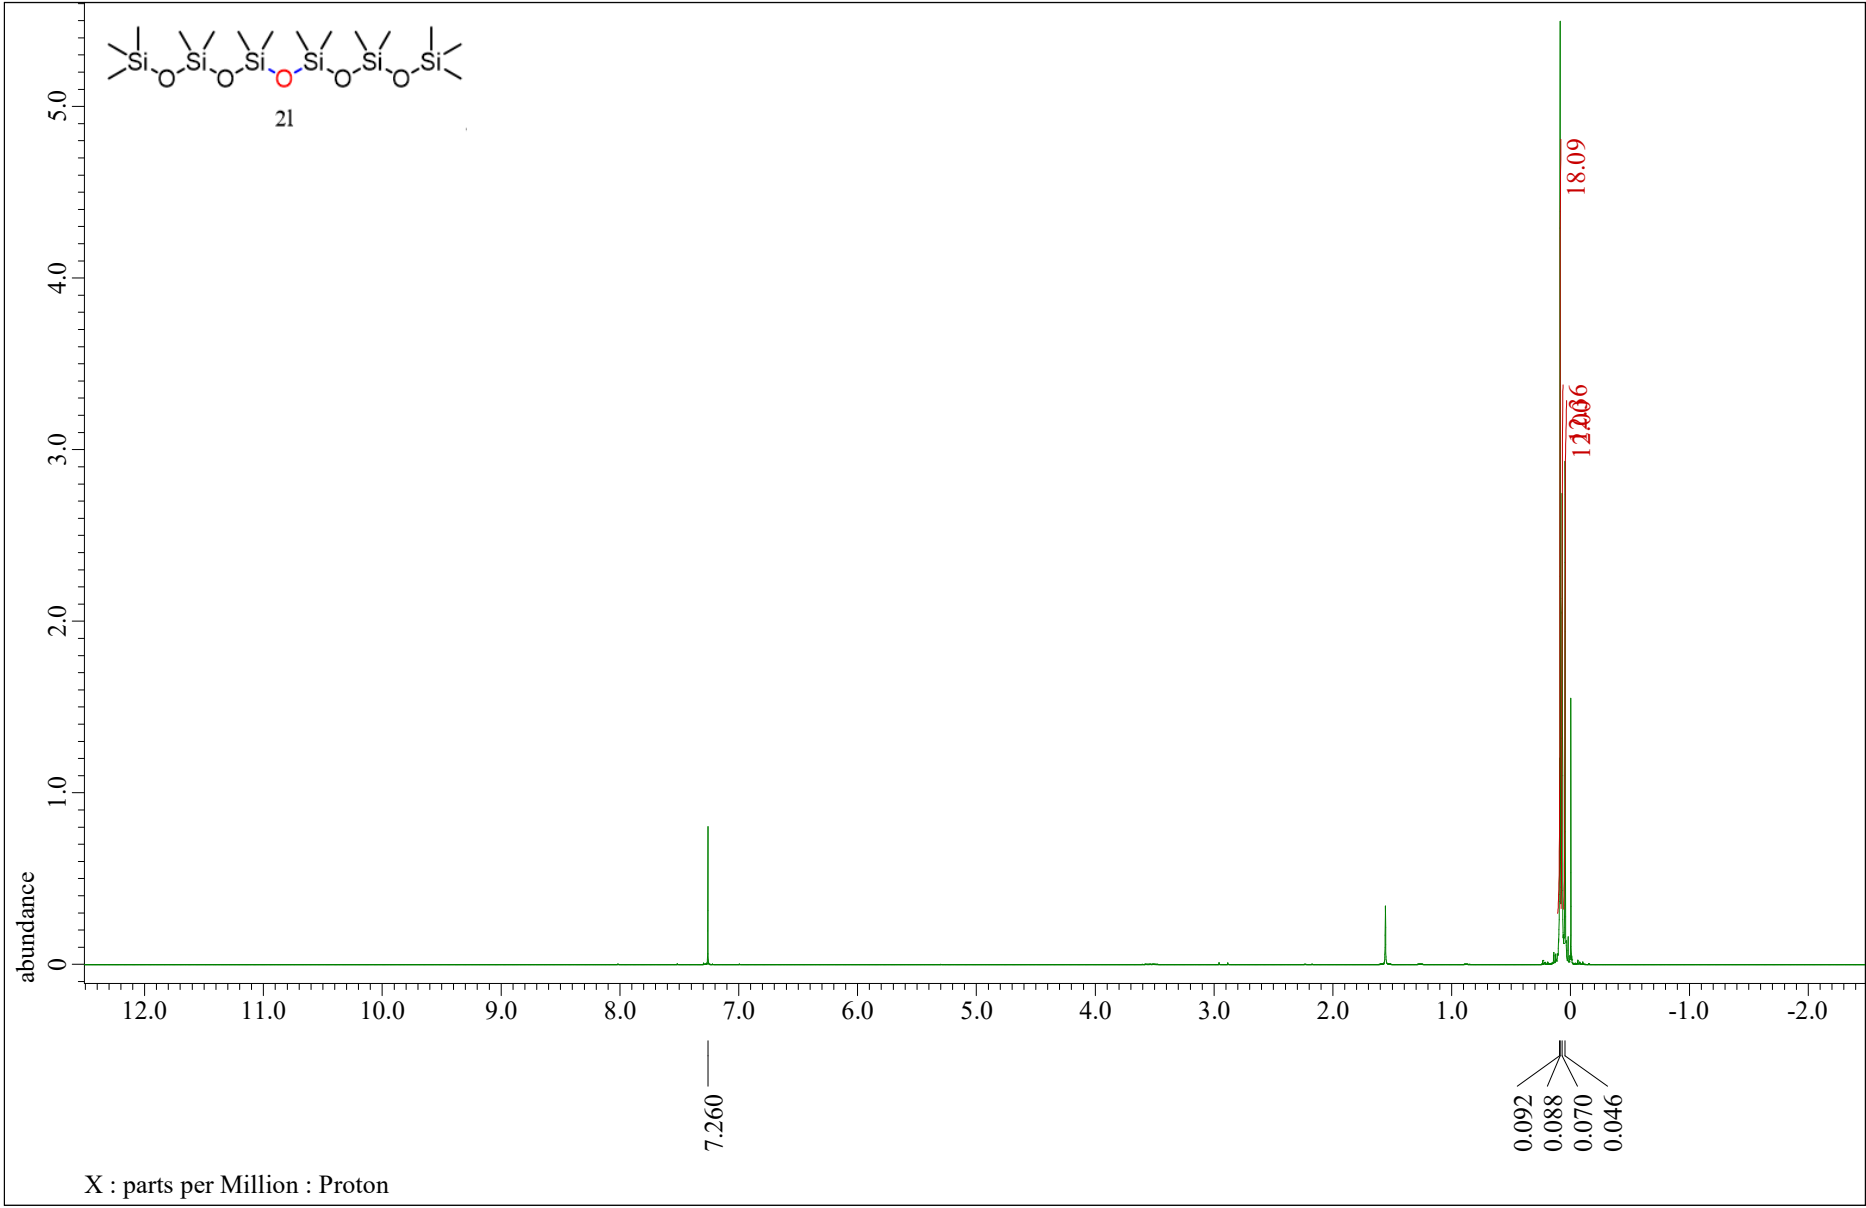

LC-237-C\_Carbon-1-3.jdf

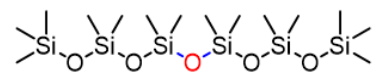

21

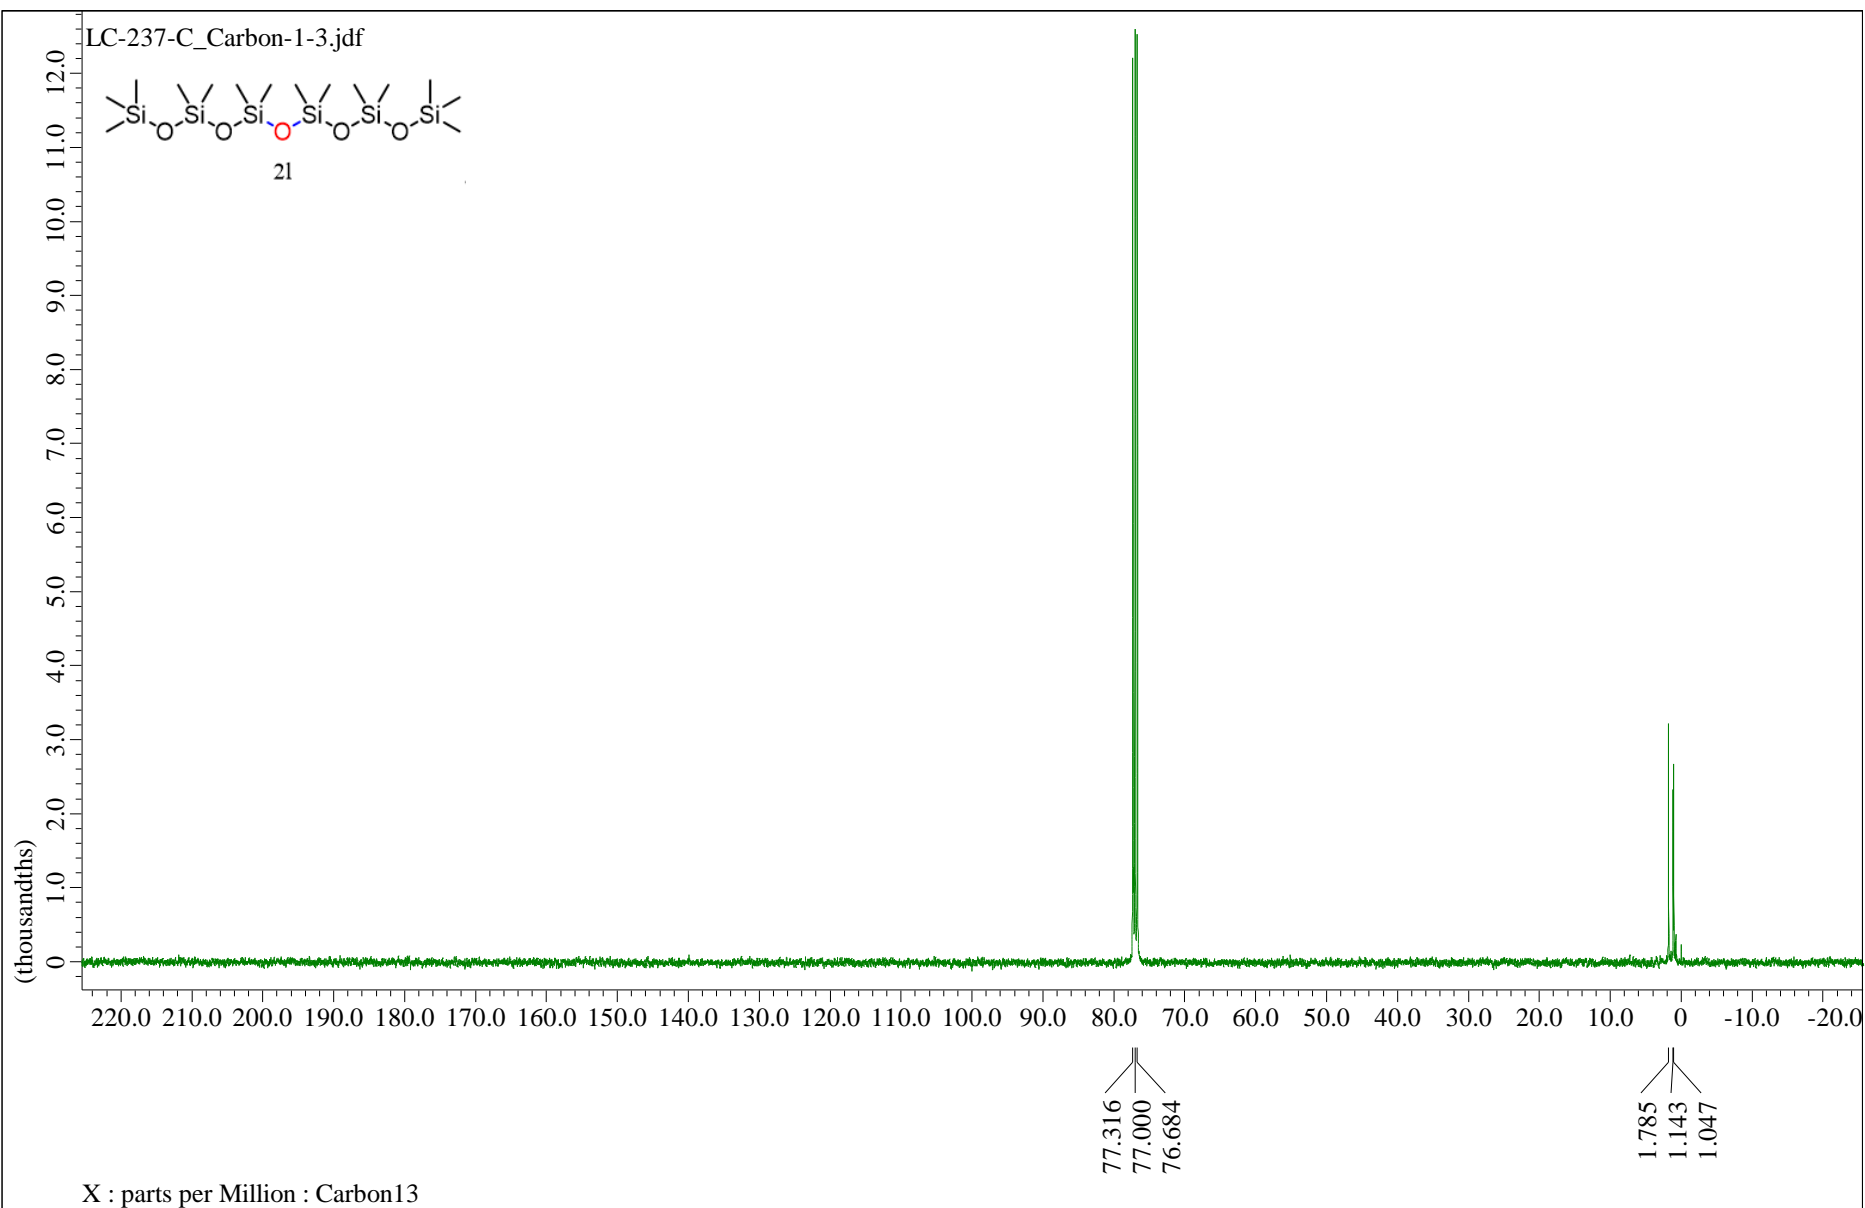



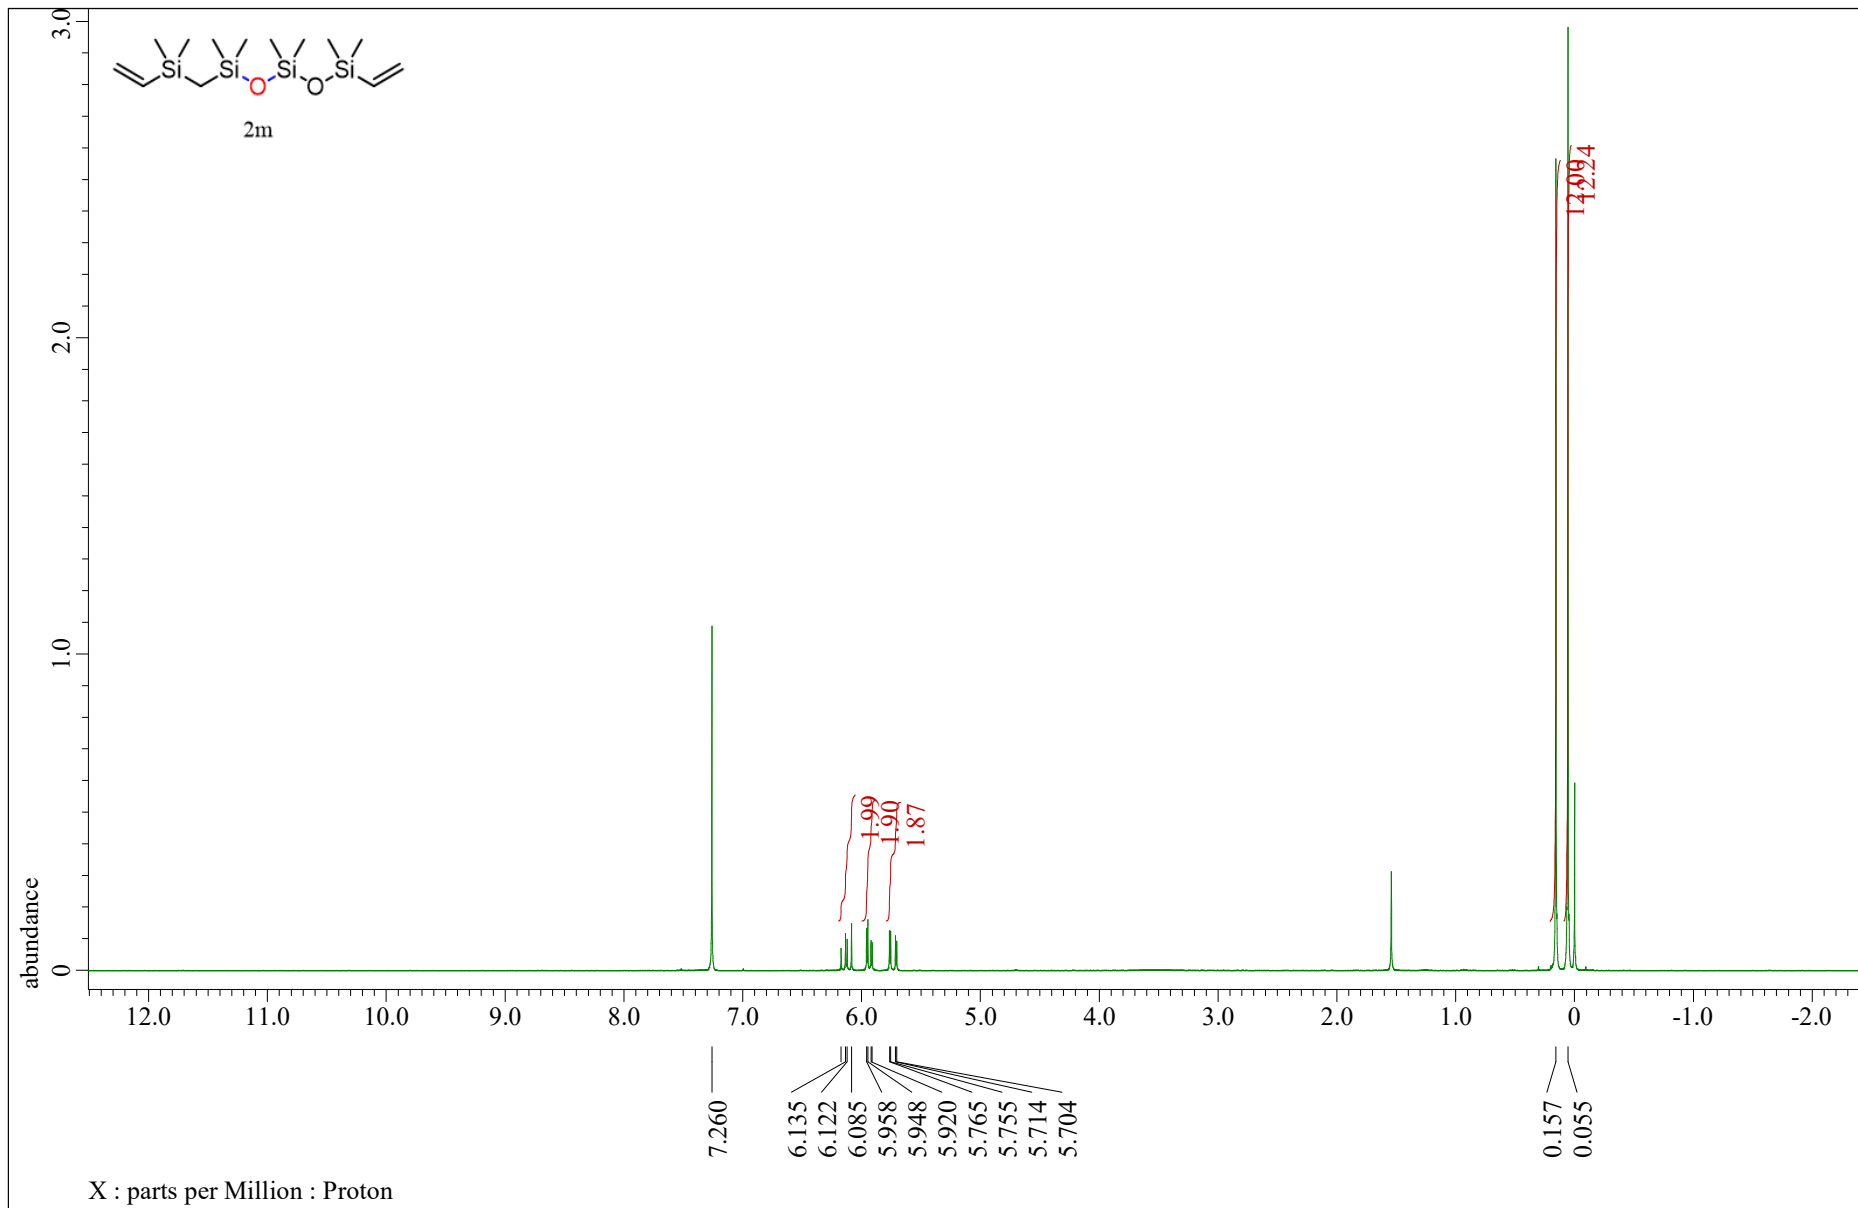

LC-378-6\_Carbon-1-3.jdf

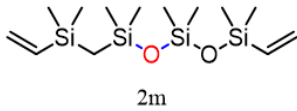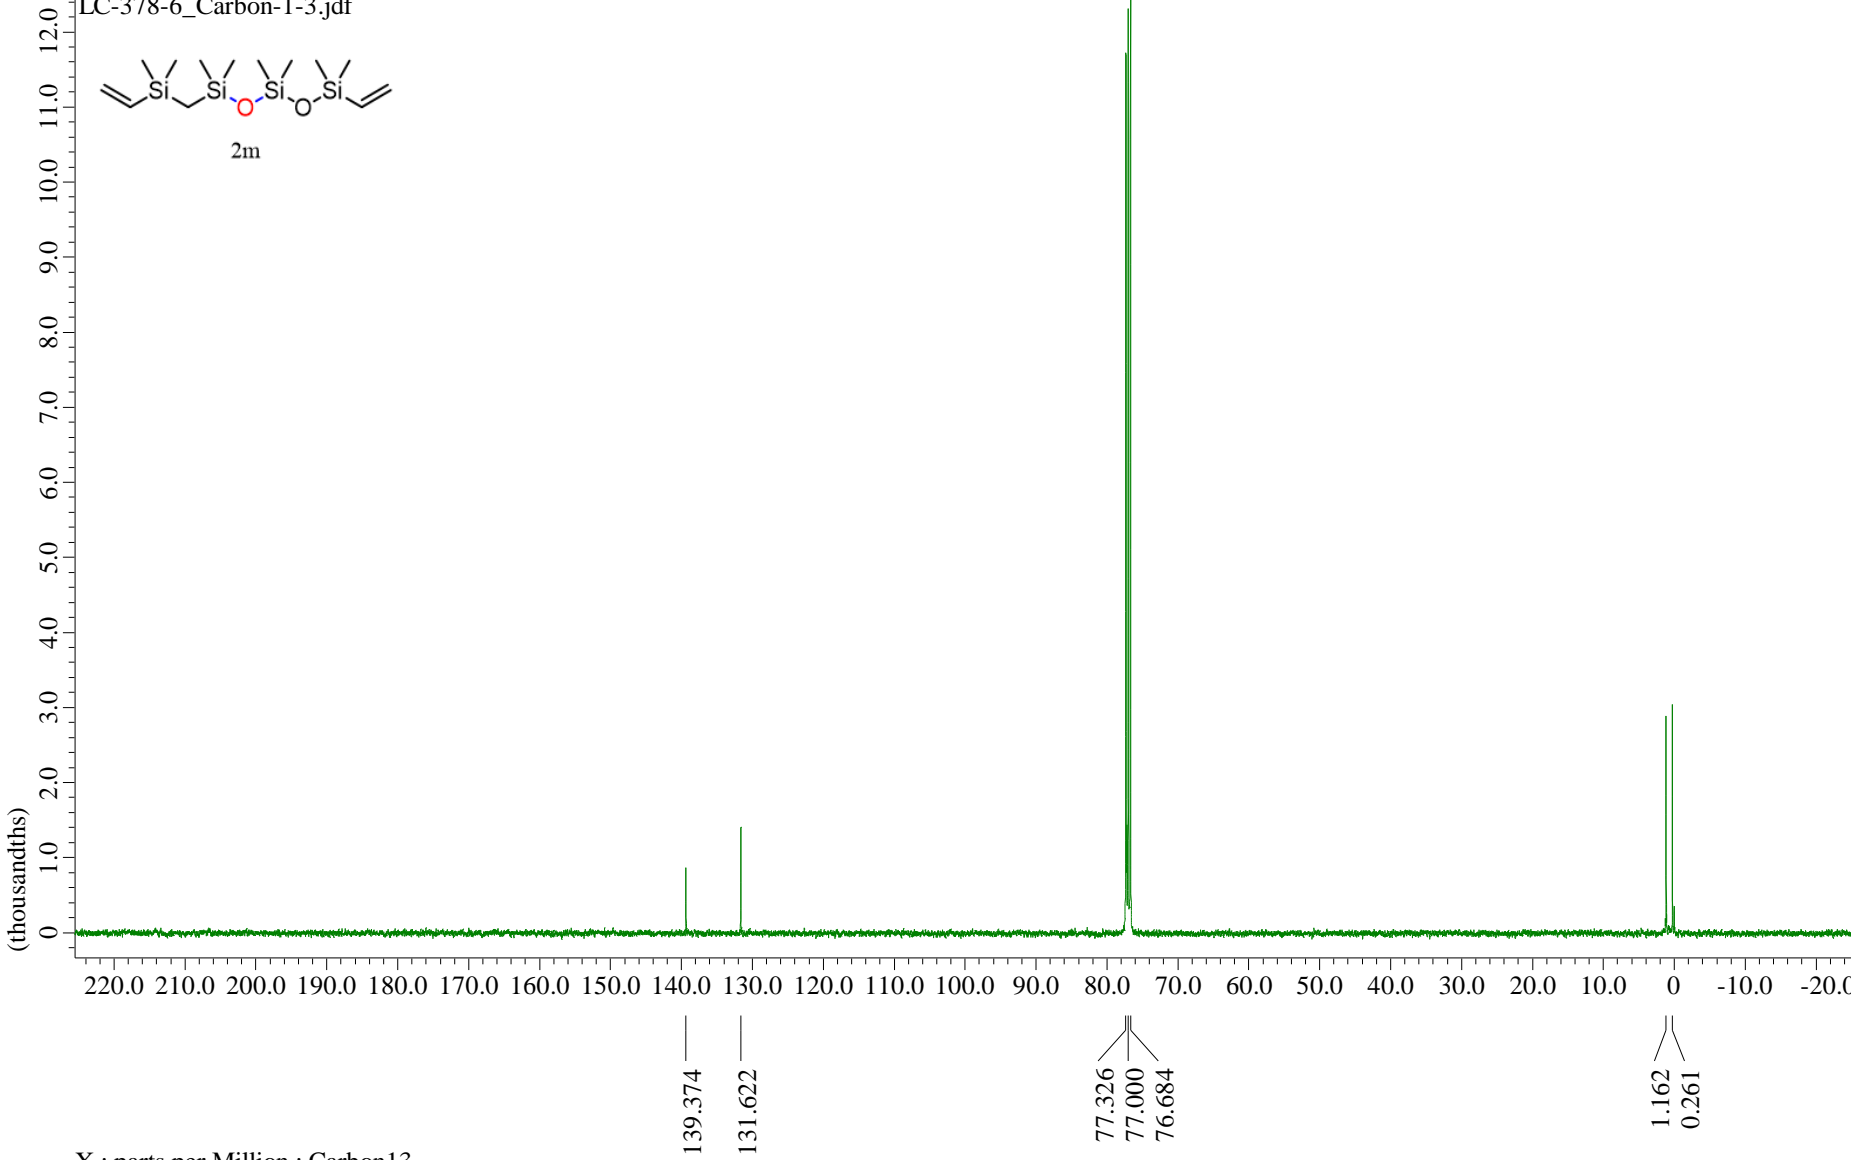

LC-270-HH\_Proton-1-3.jdf

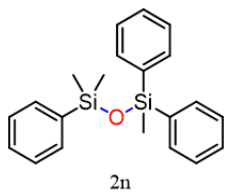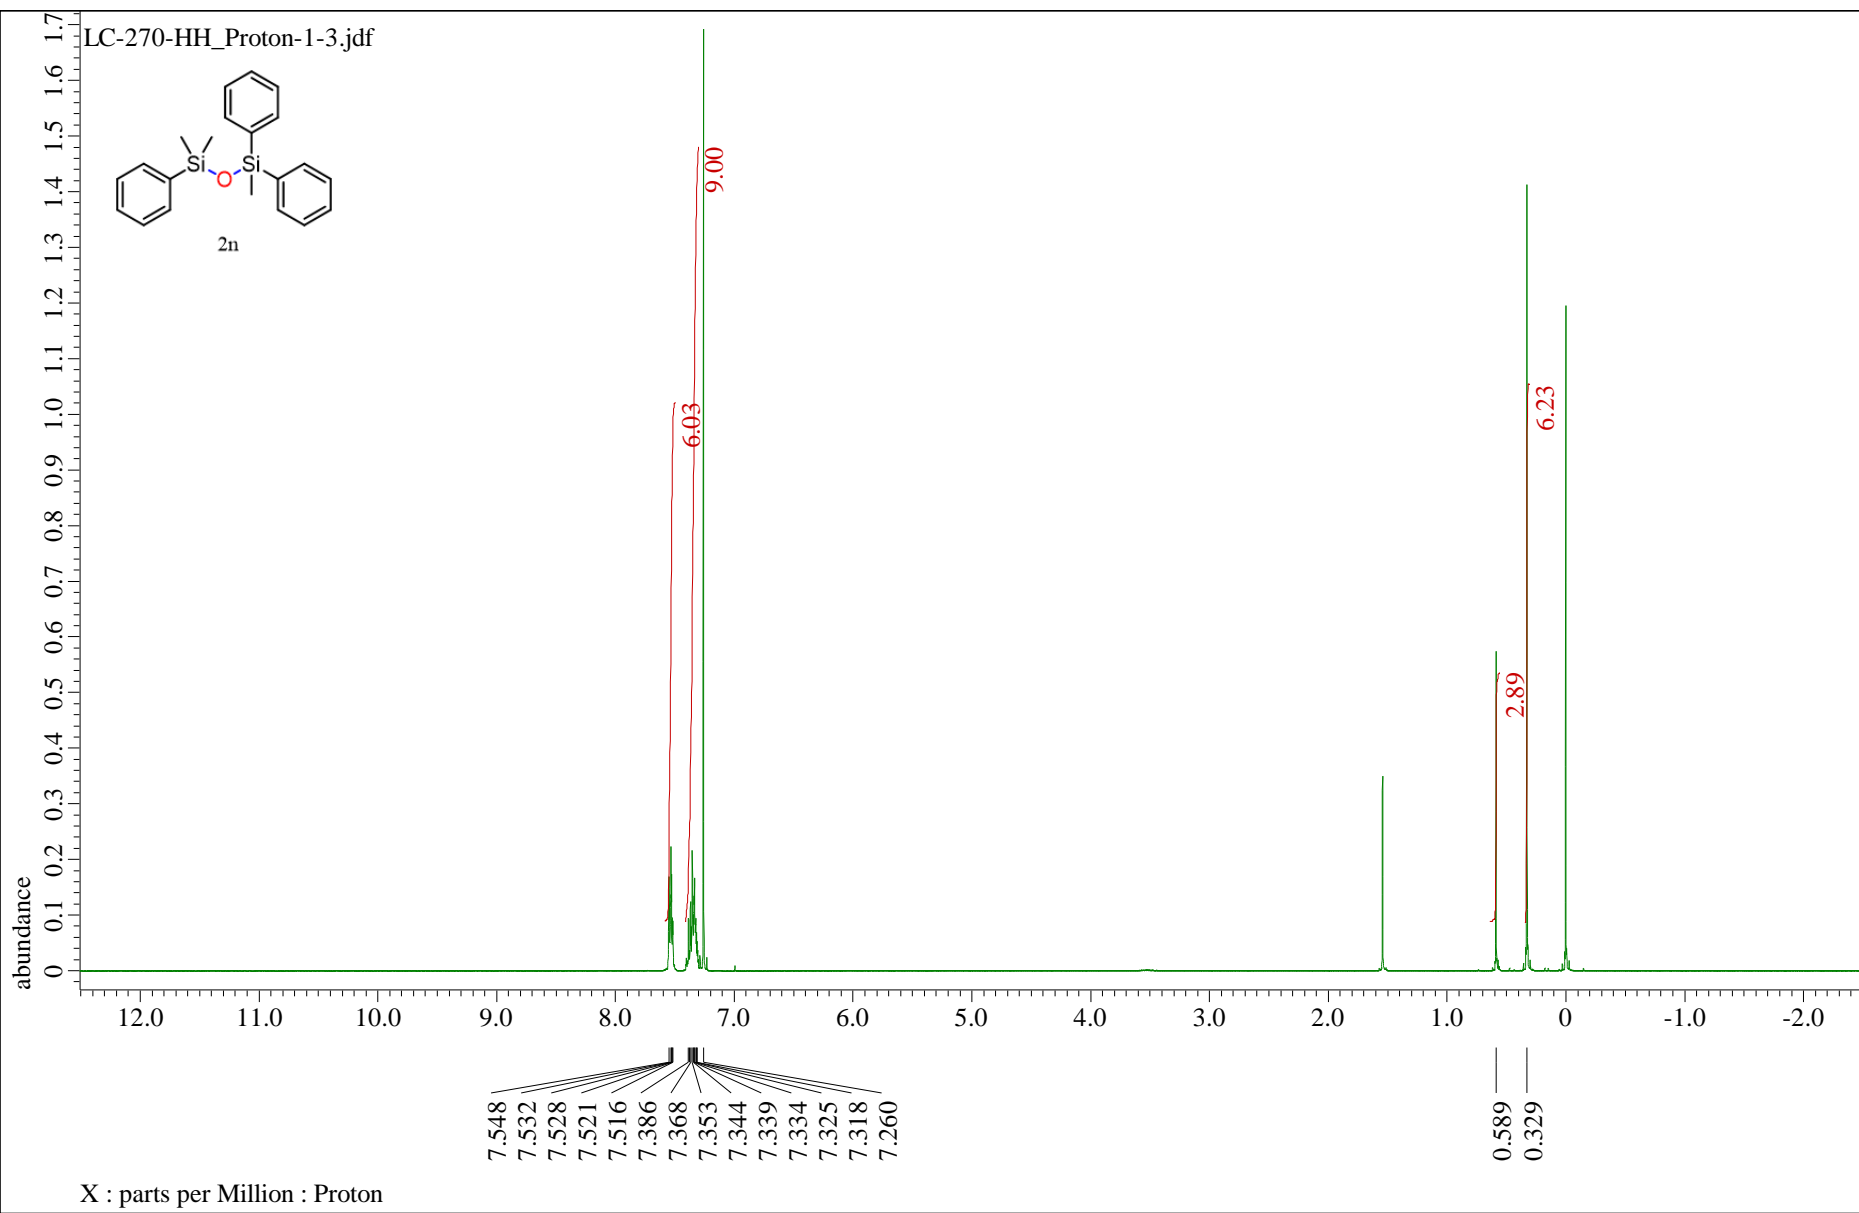

LC-270-C\_Carbon-1-3.jdf

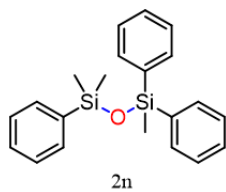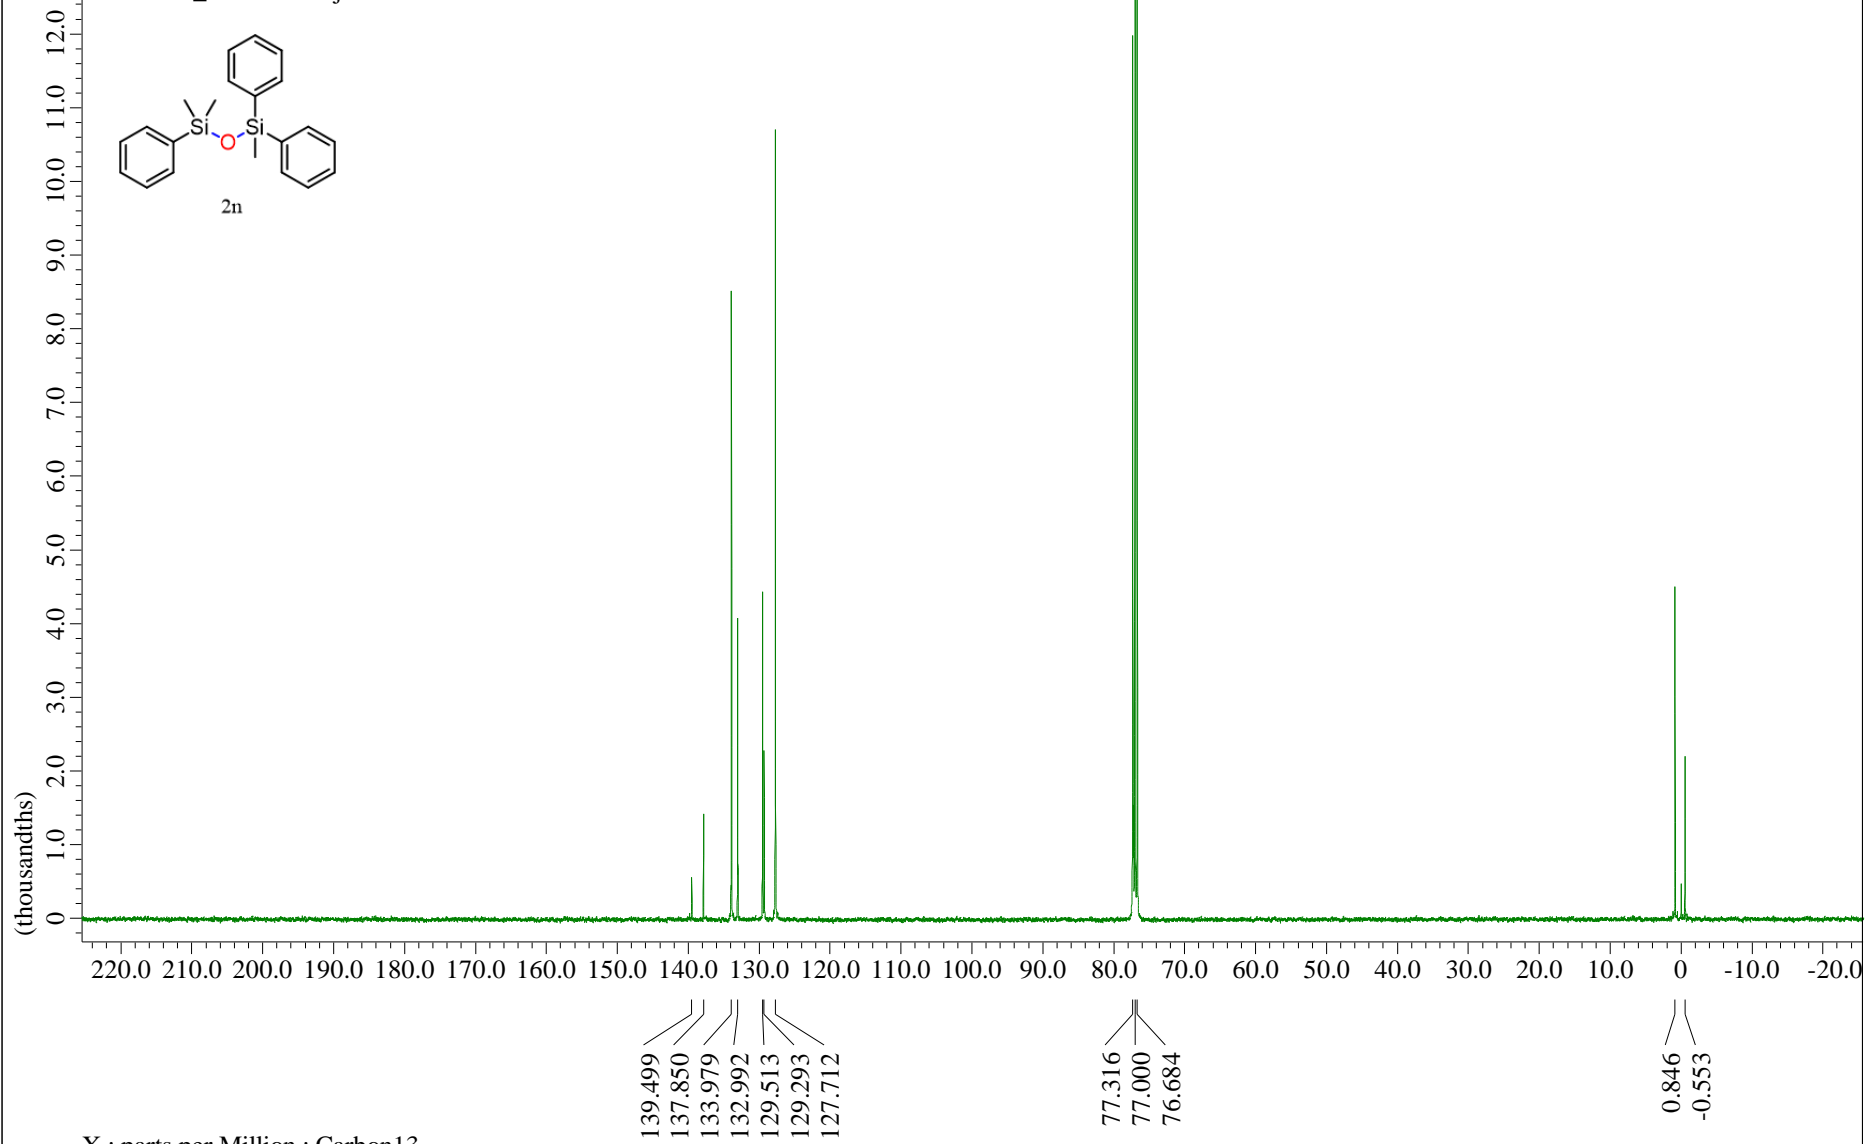

LC-813-H\_Proton-1-4.jdf

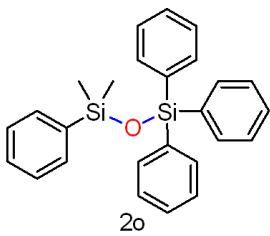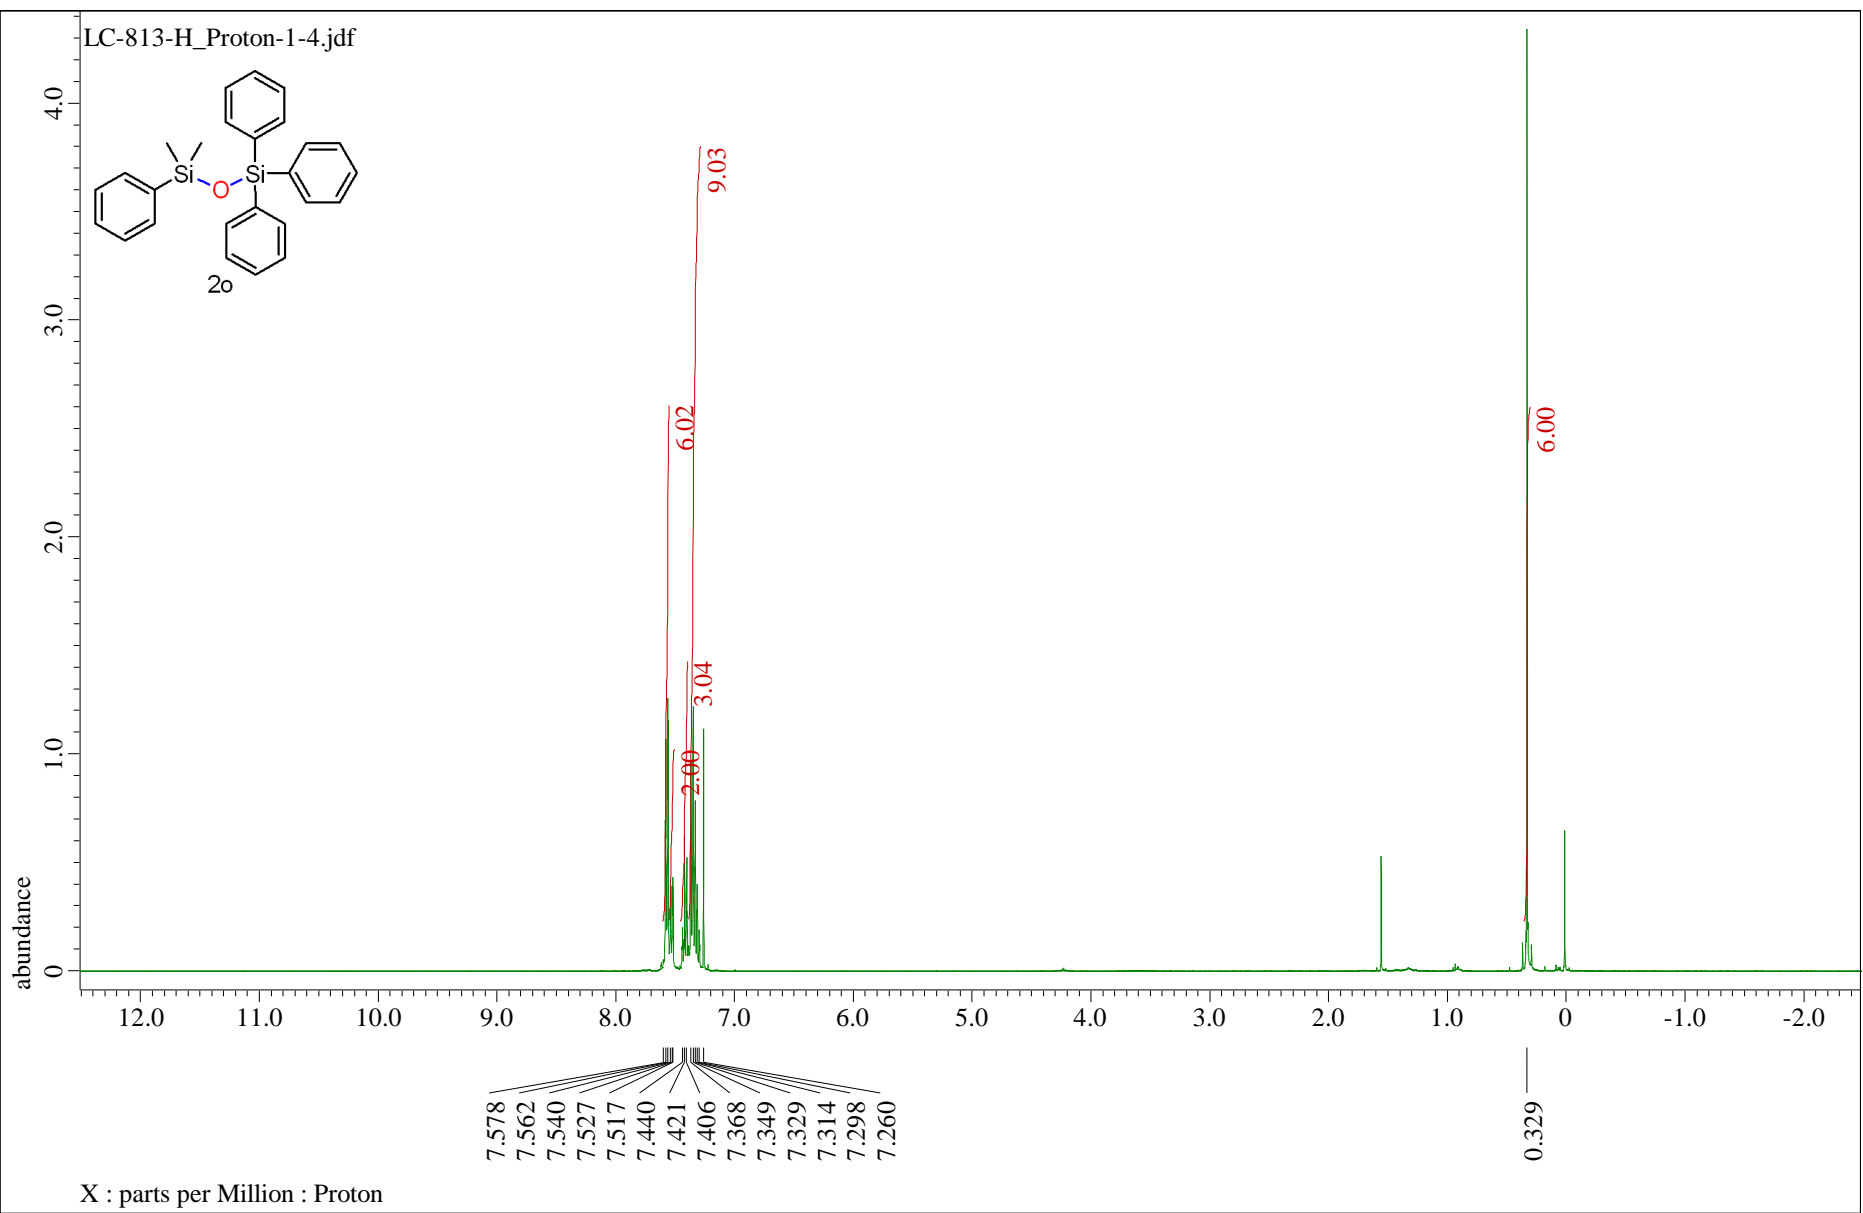

LC-813-C\_Carbon-1-3.jdf

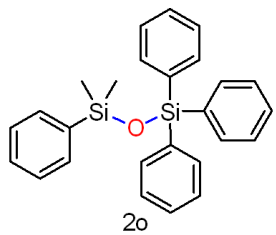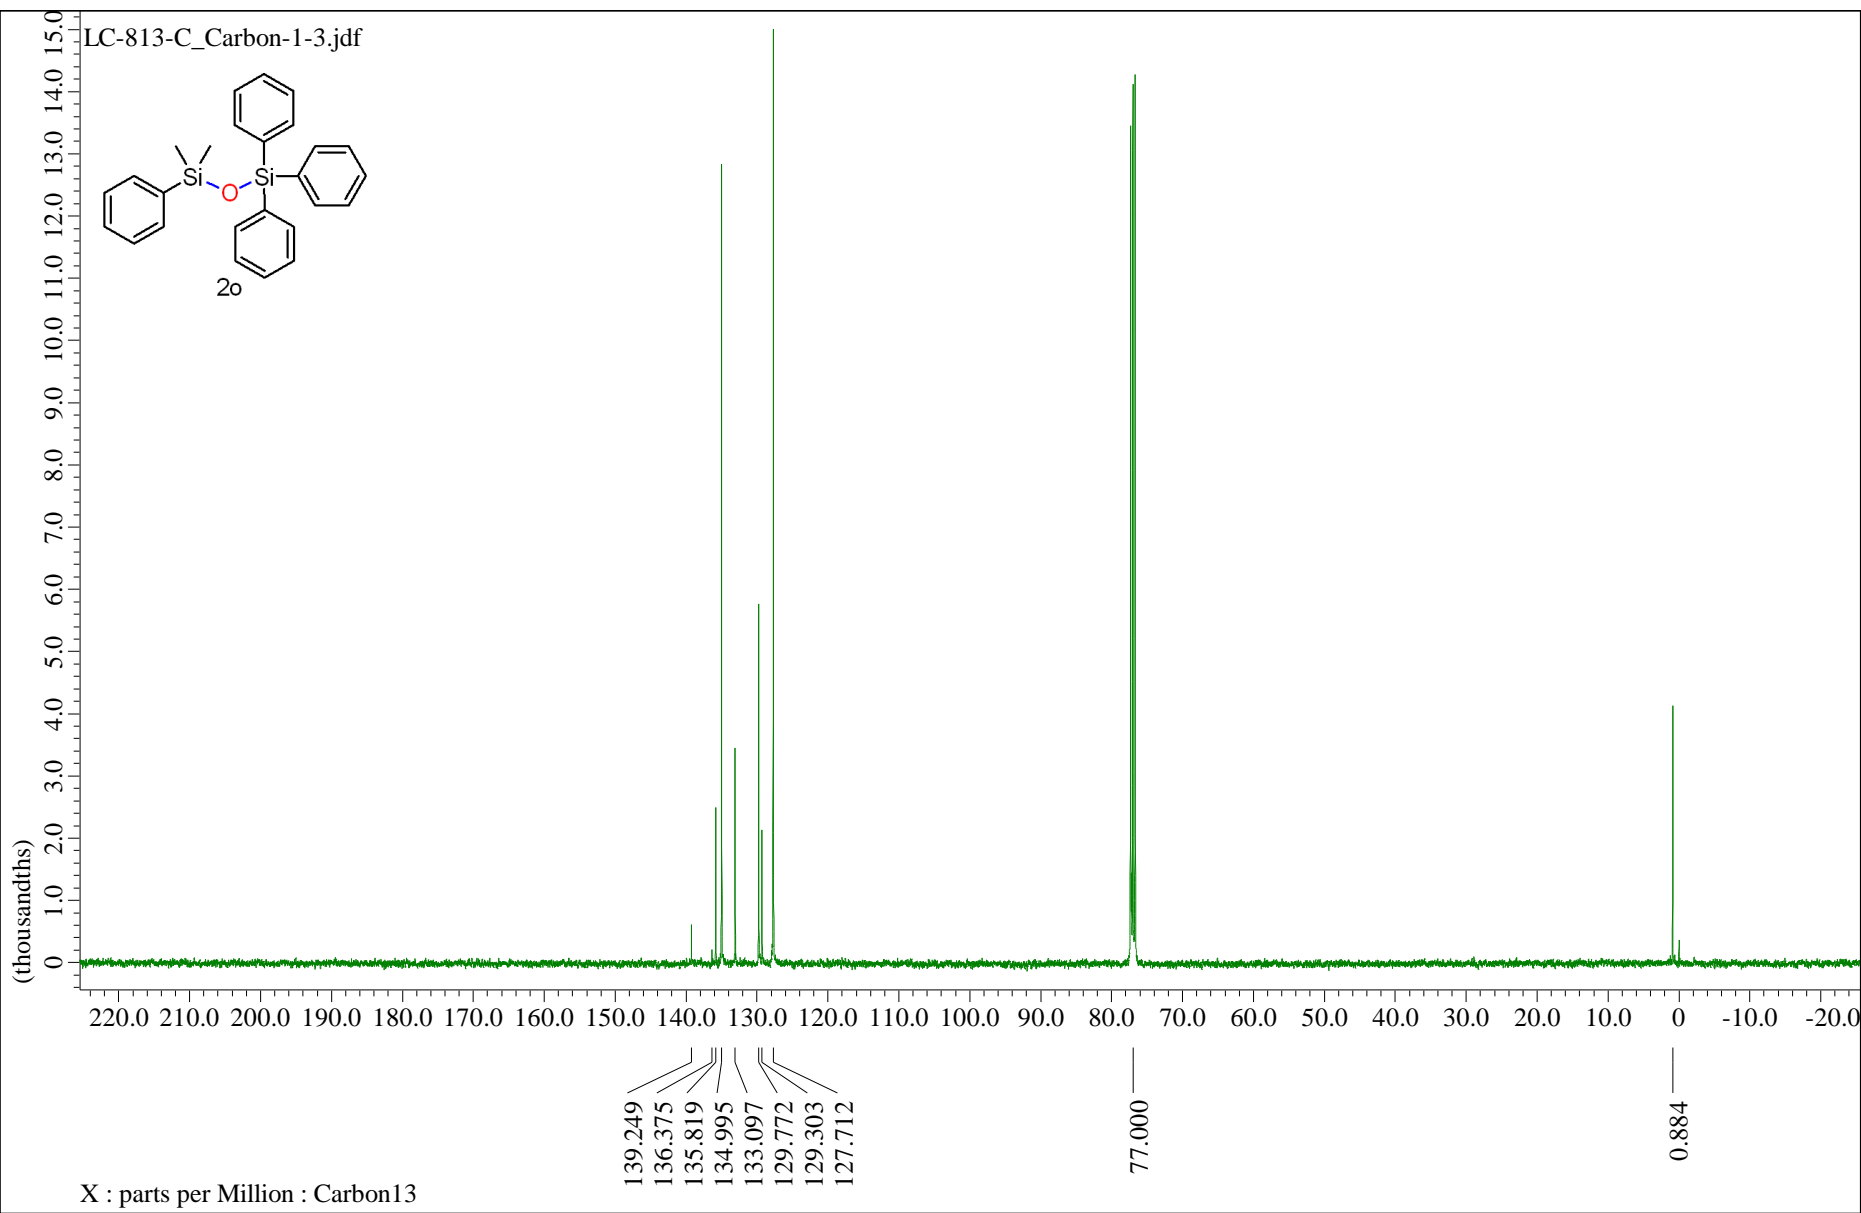

LC-814-HH\_Proton-1-3.jdf

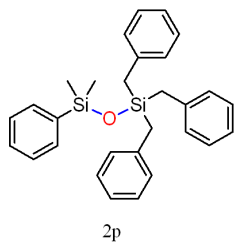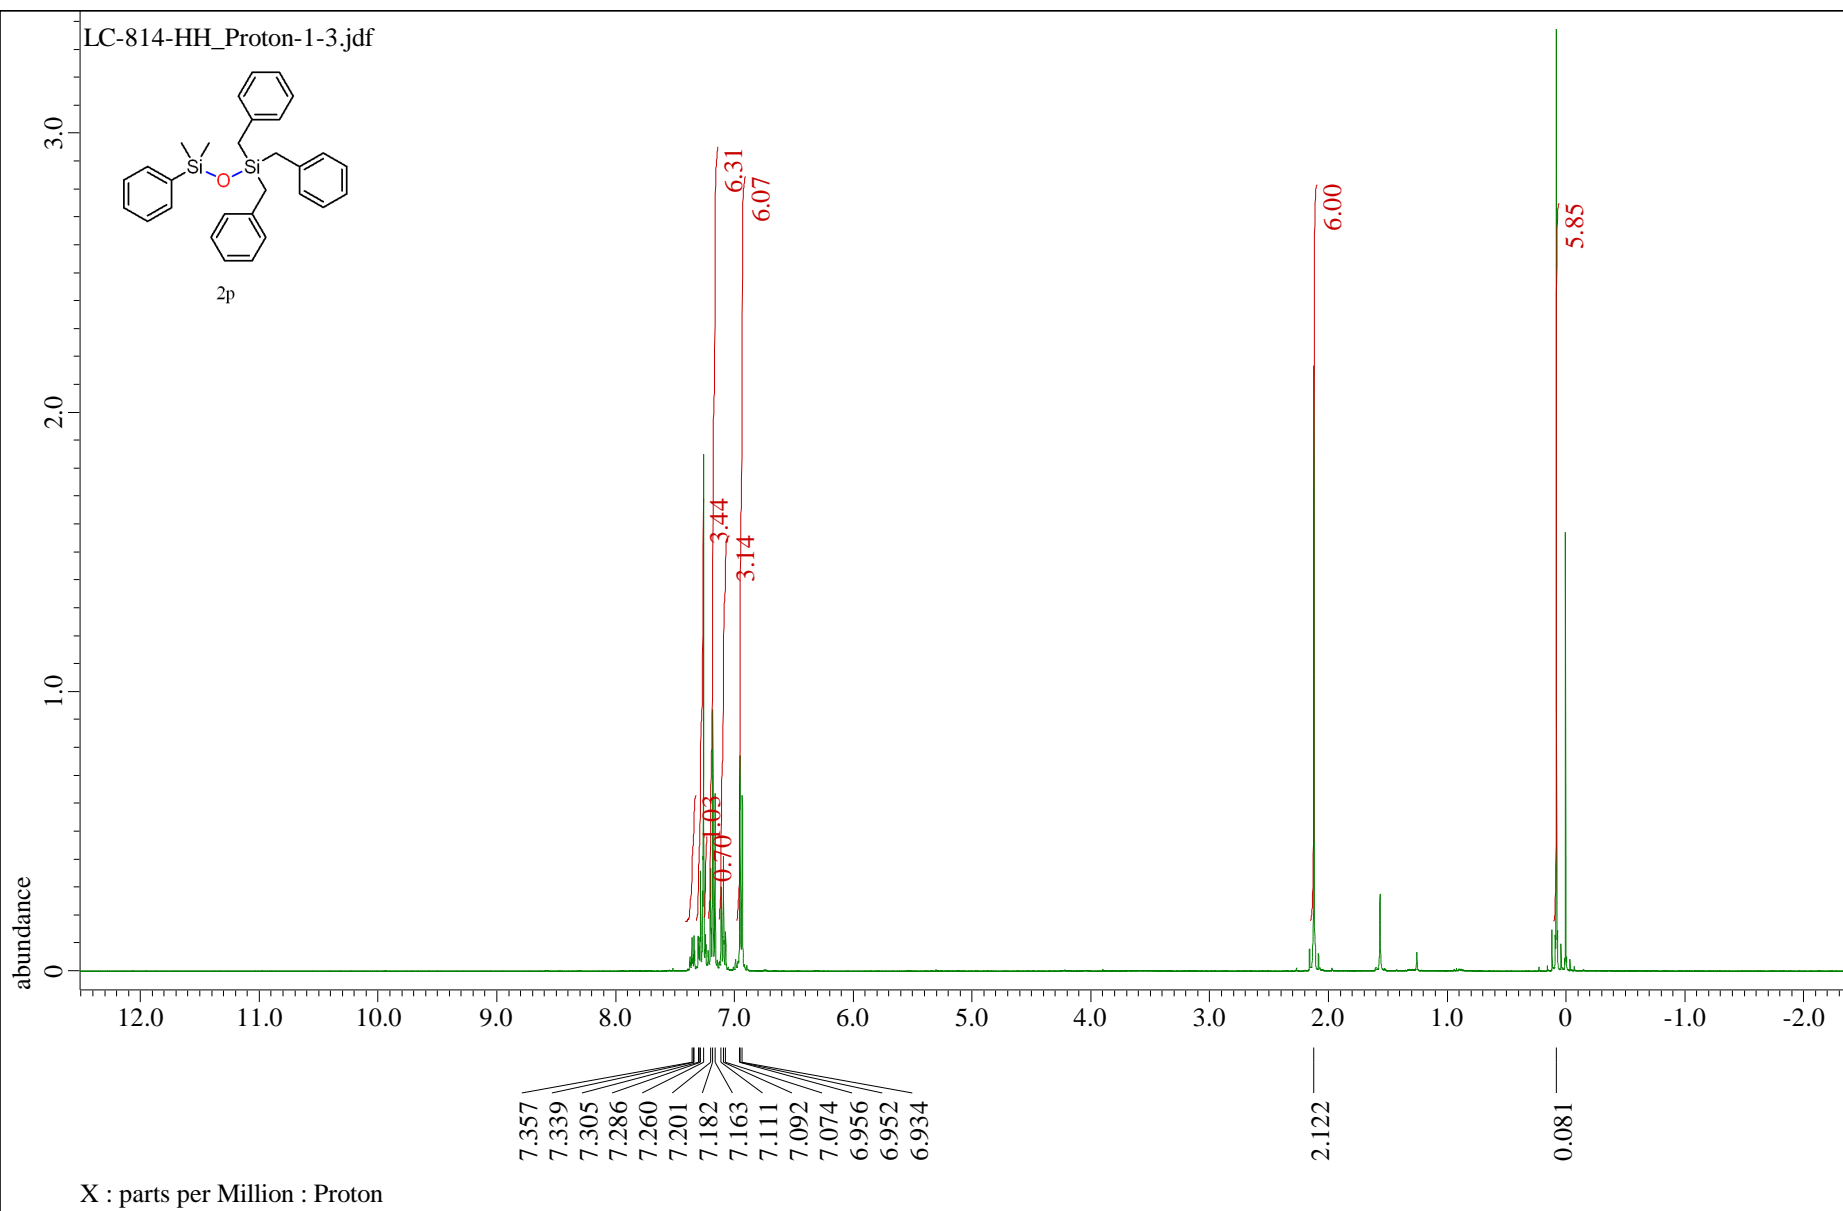

LC-814-HH\_Carbon-1-3.jdf

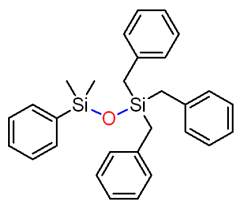

2p

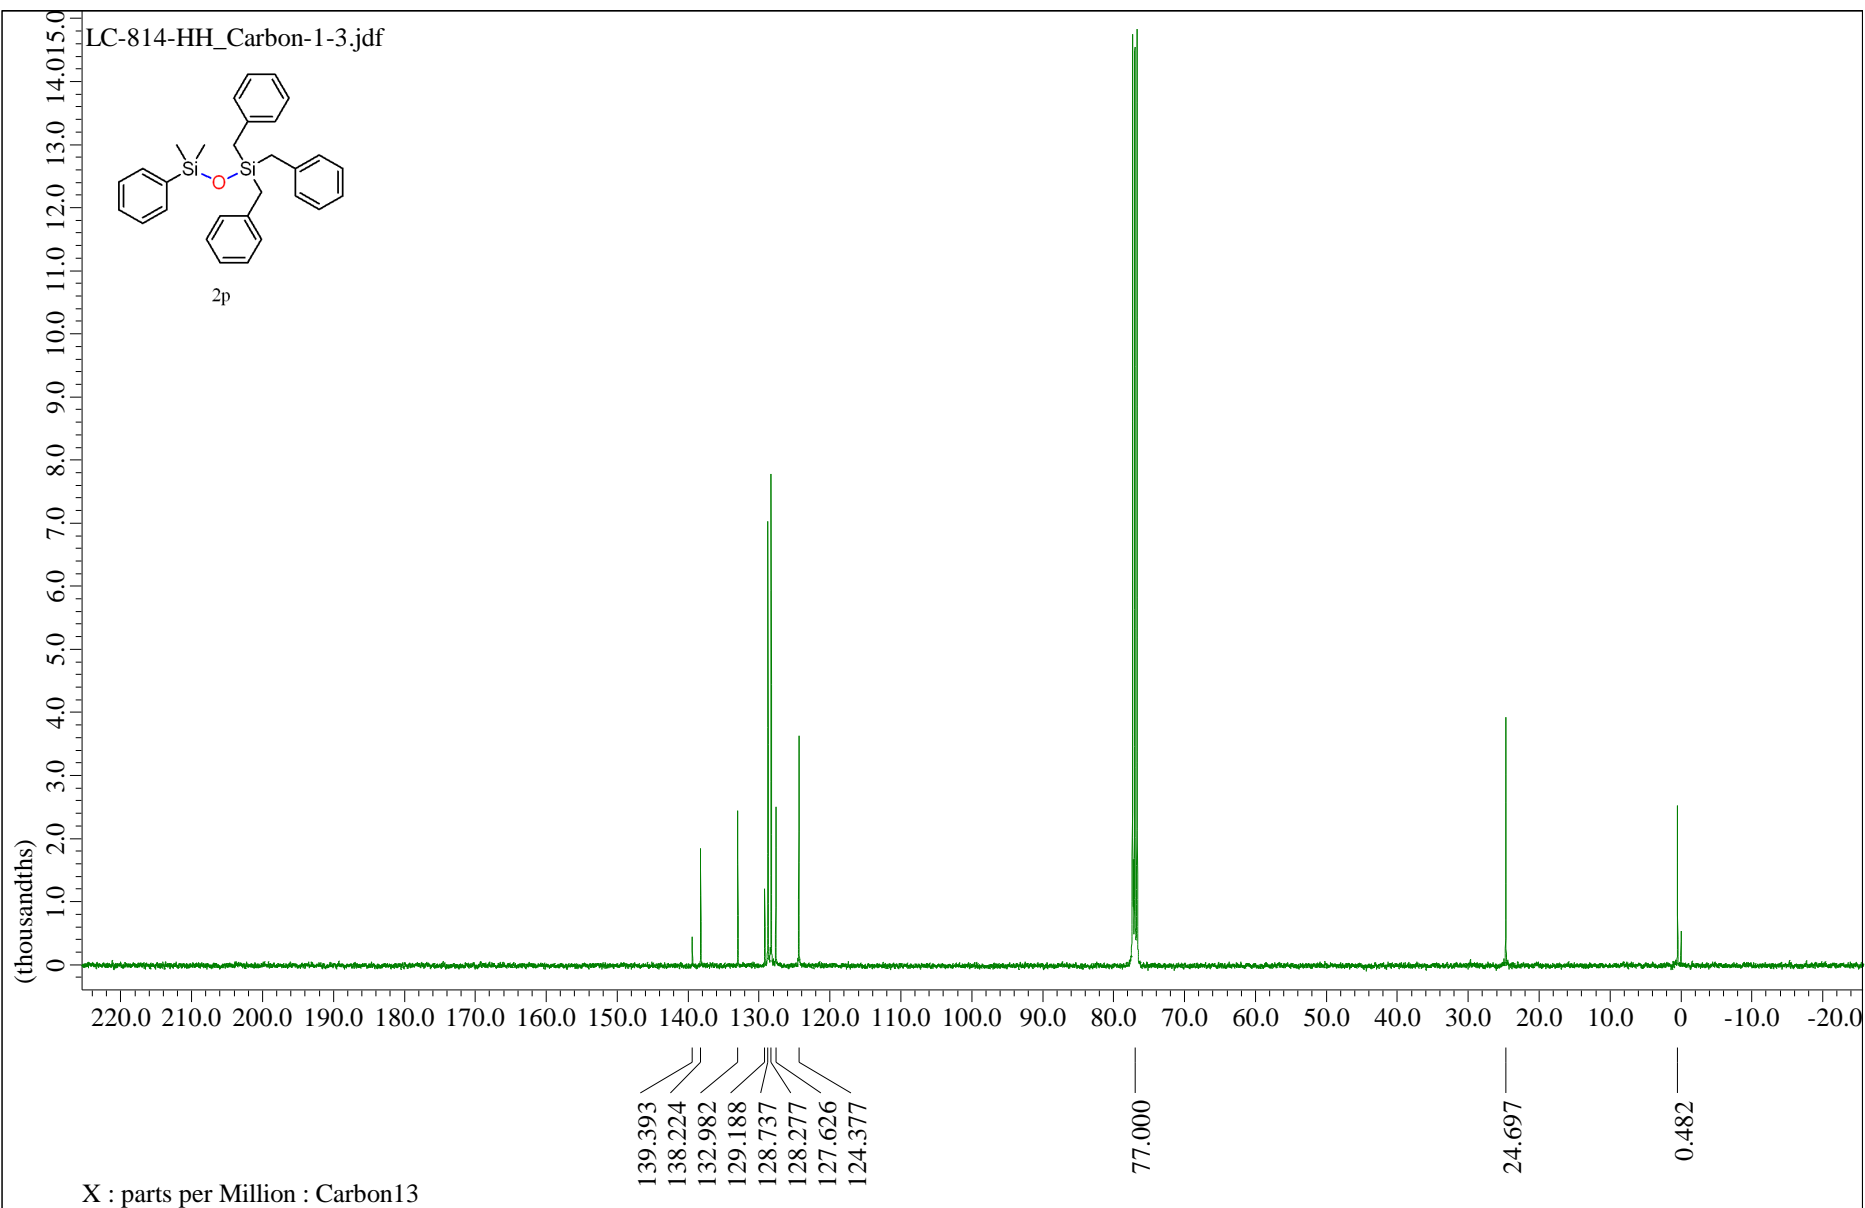



LC-448-3-Z\_Proton-1-5.jdf

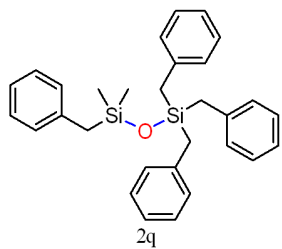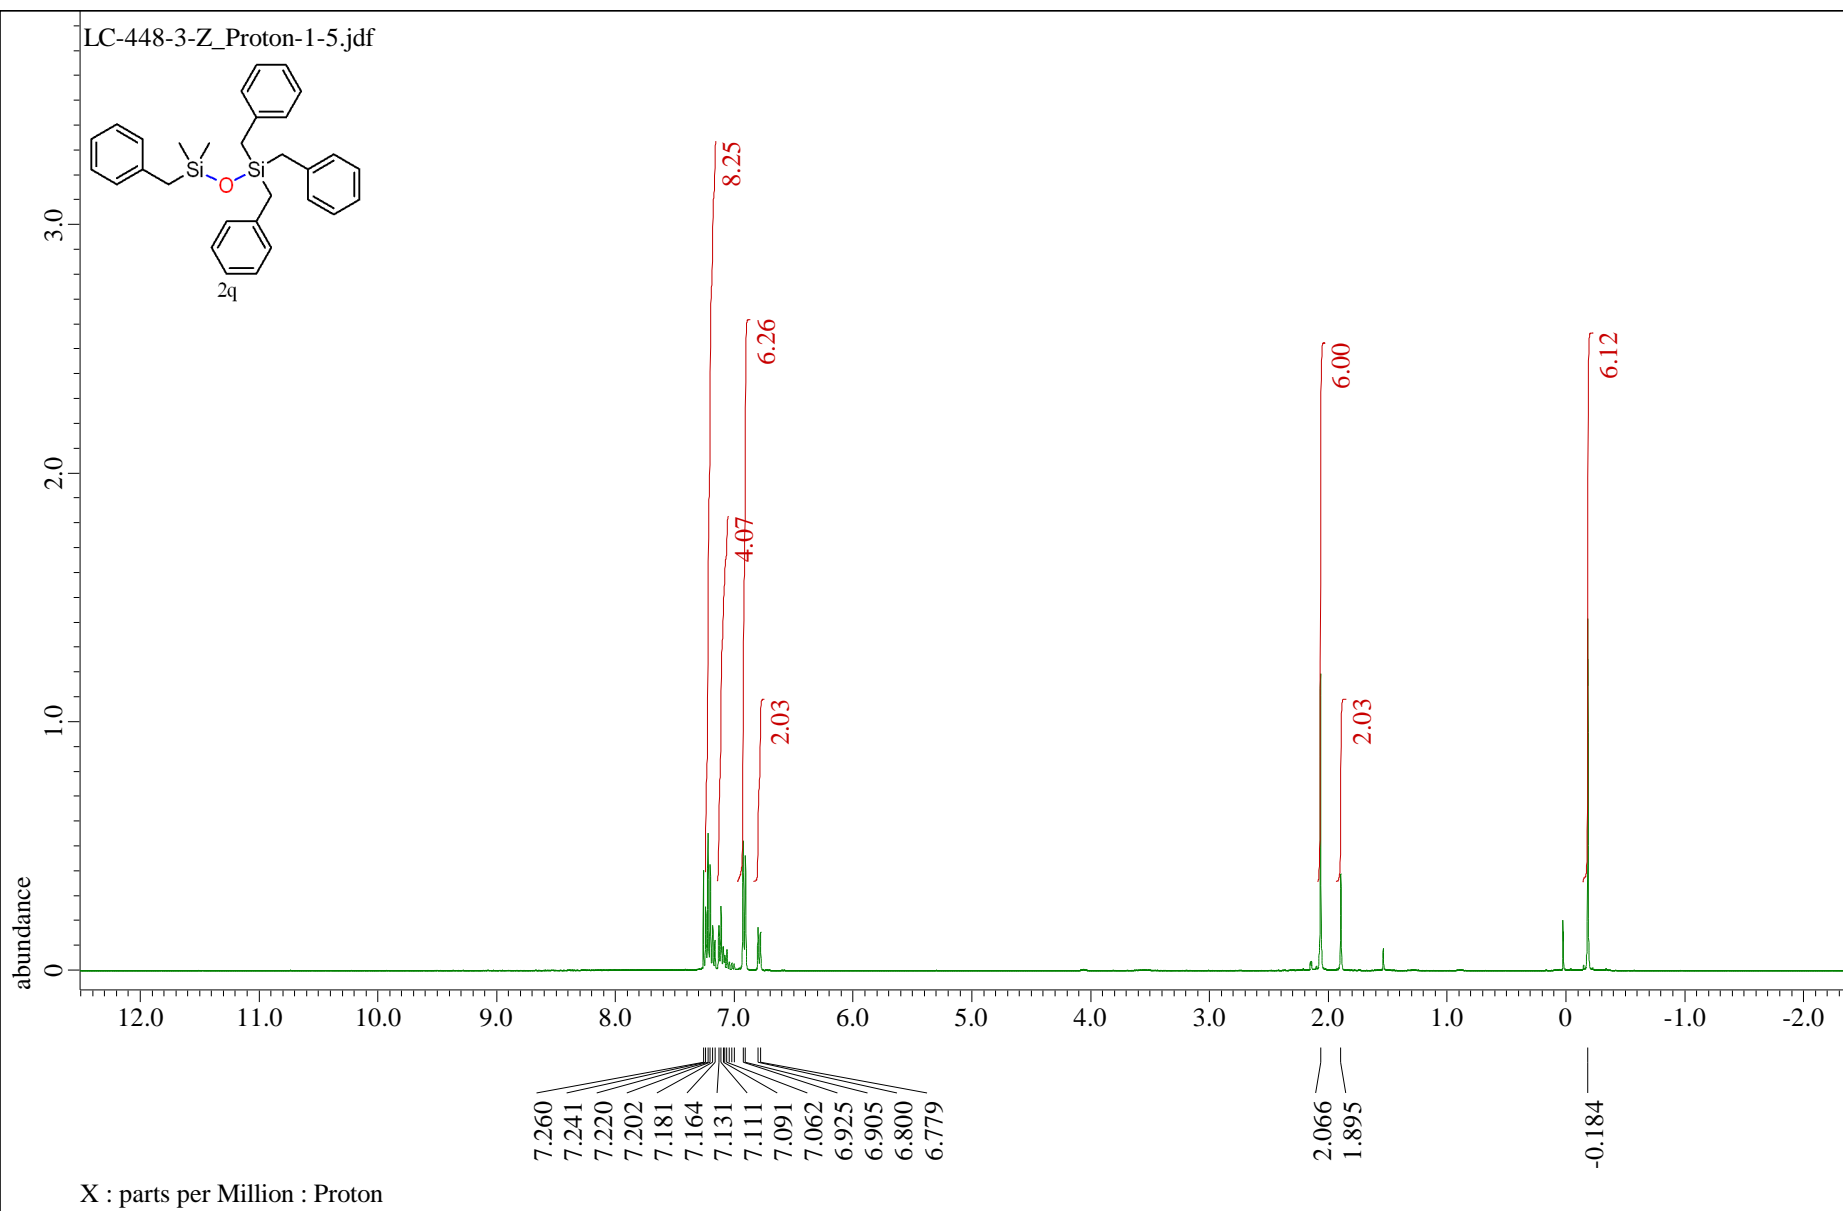

LC-448-3-Z\_Carbon-1-3.jdf

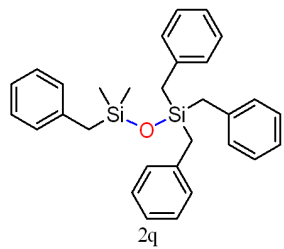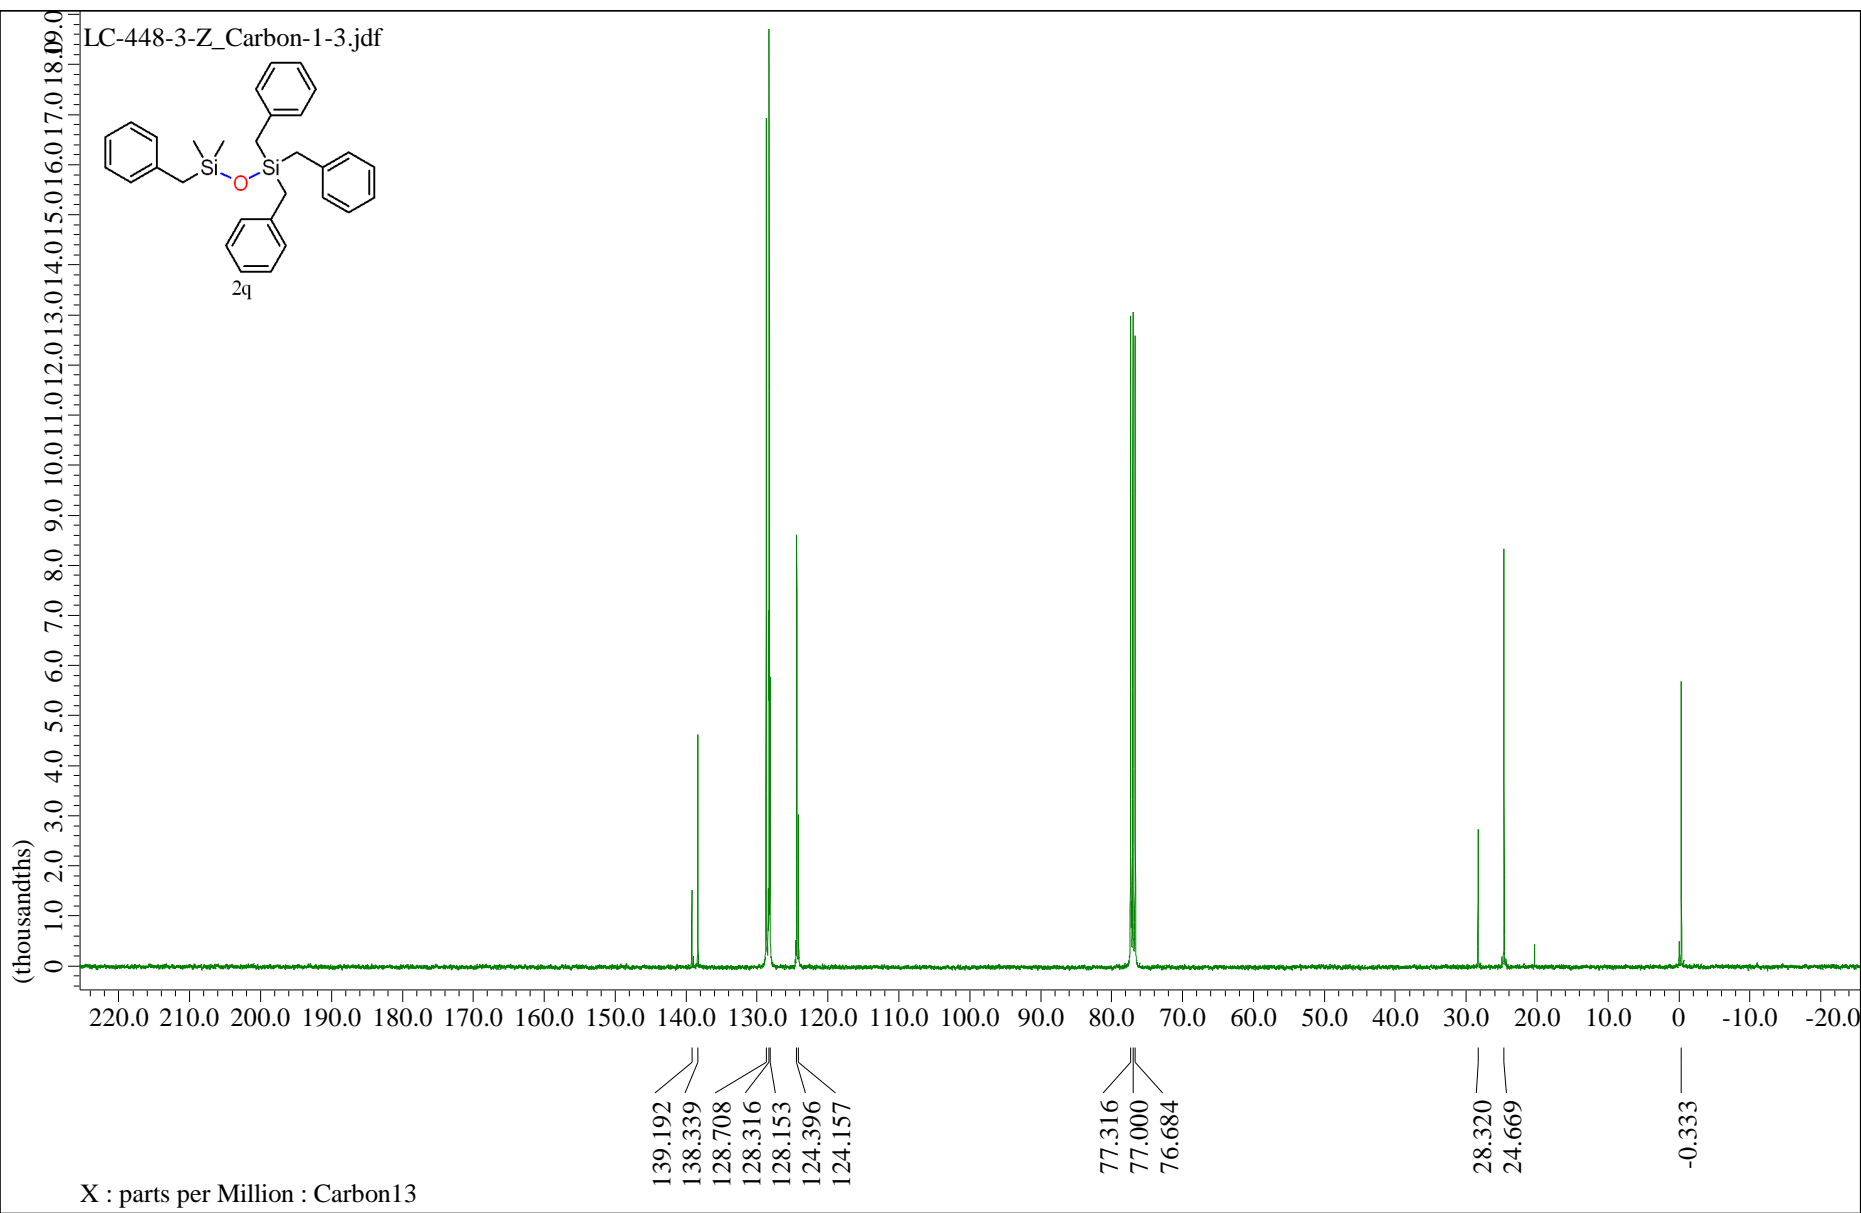

LC-815-HZ\_Proton-1-3.jdf

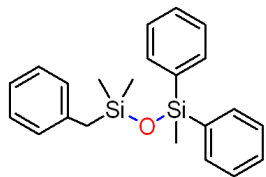

2r

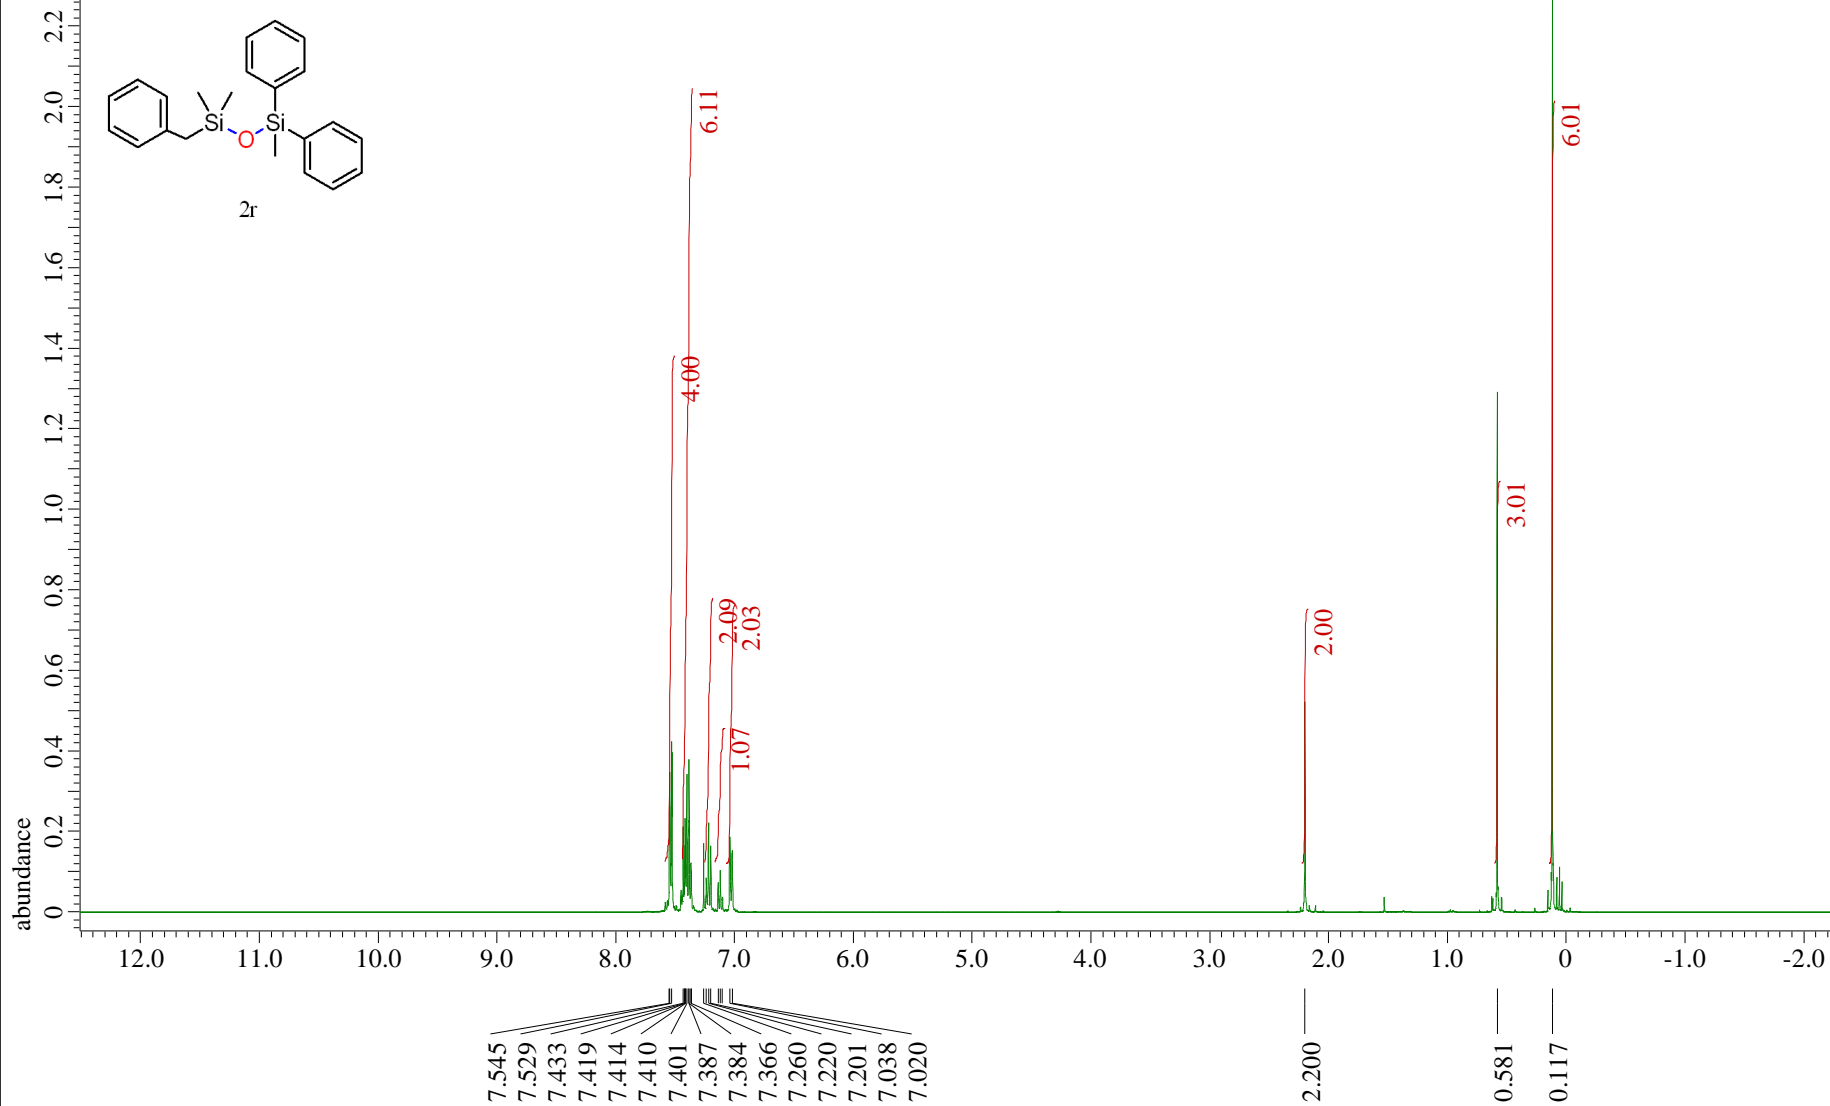

X : parts per Million : Proton

LC-815-C\_Carbon-1-3.jdf

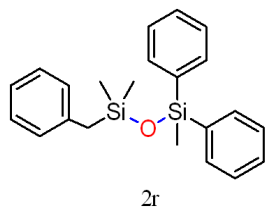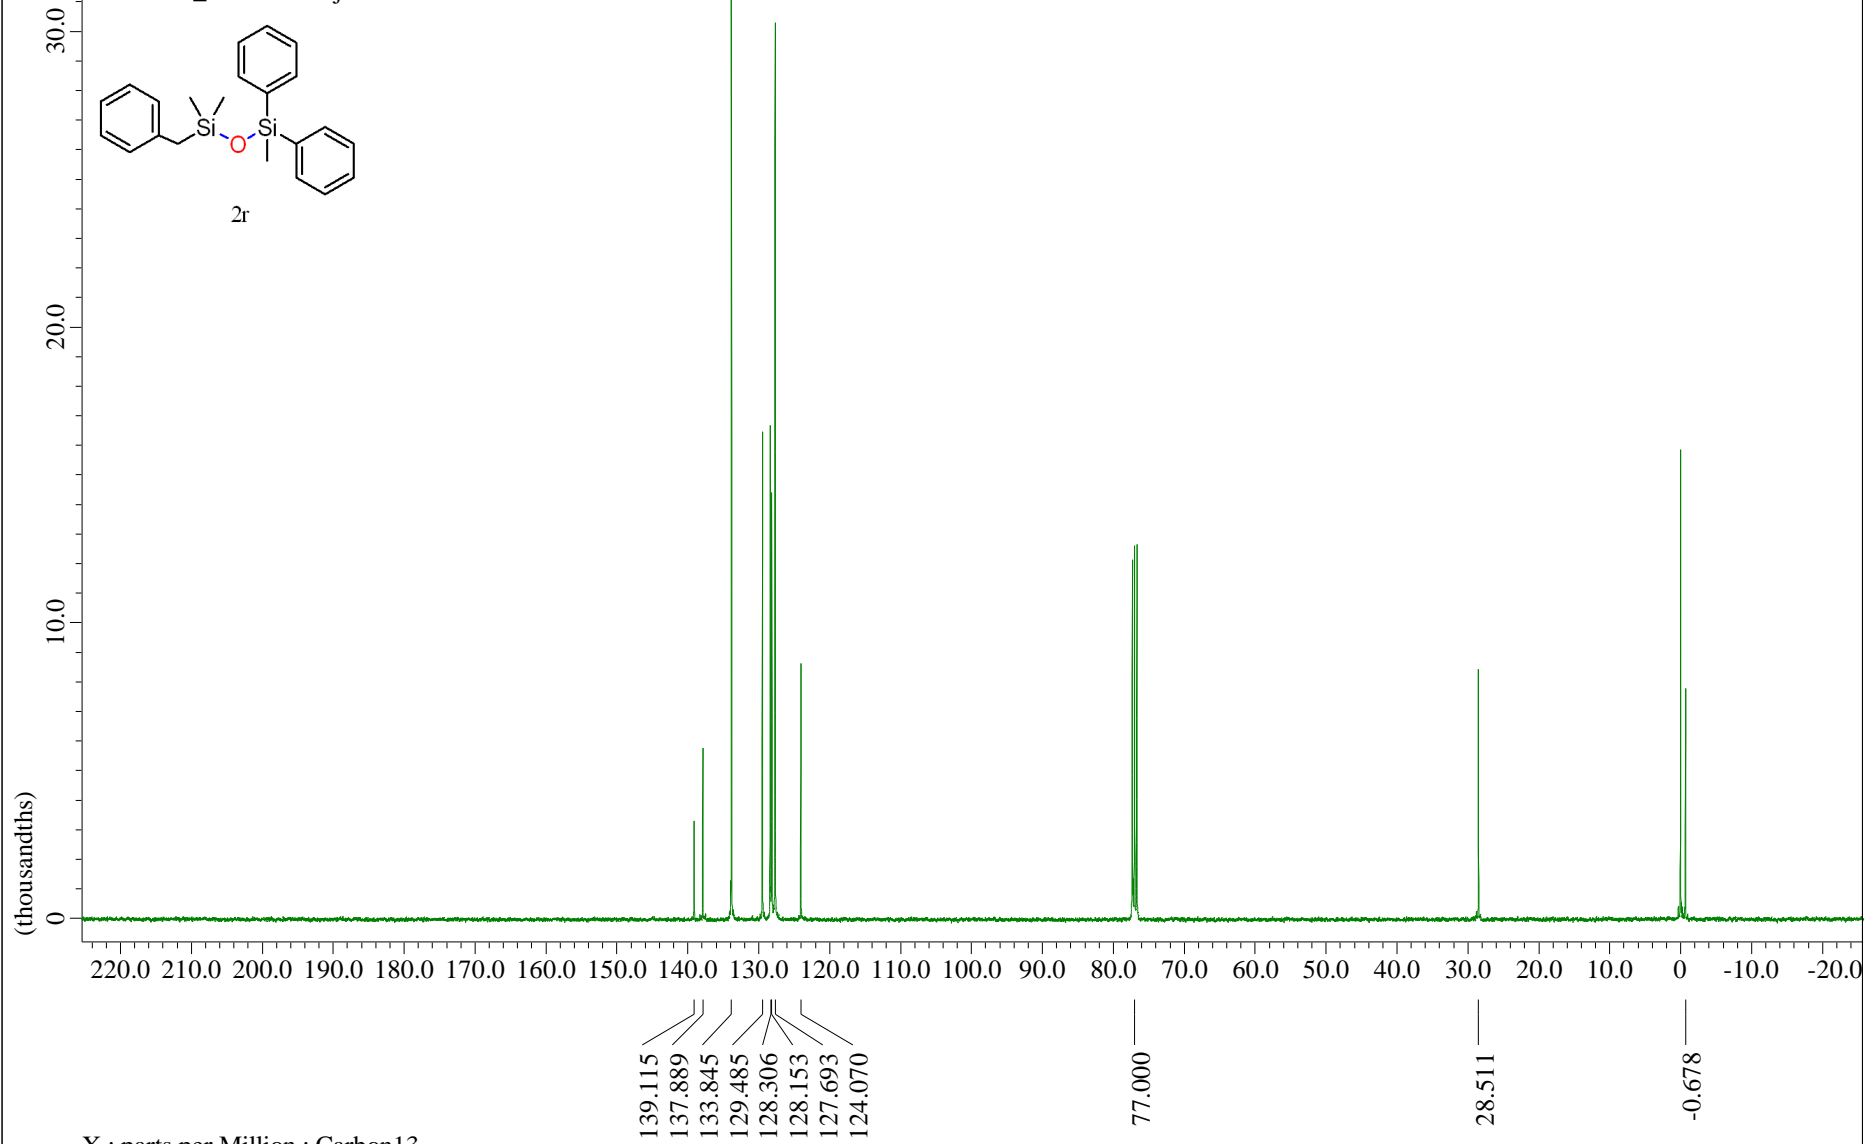

X : parts per Million : Carbon13

LC-816H-Z-HProton-1-3.jdf

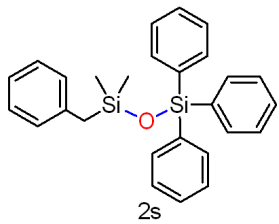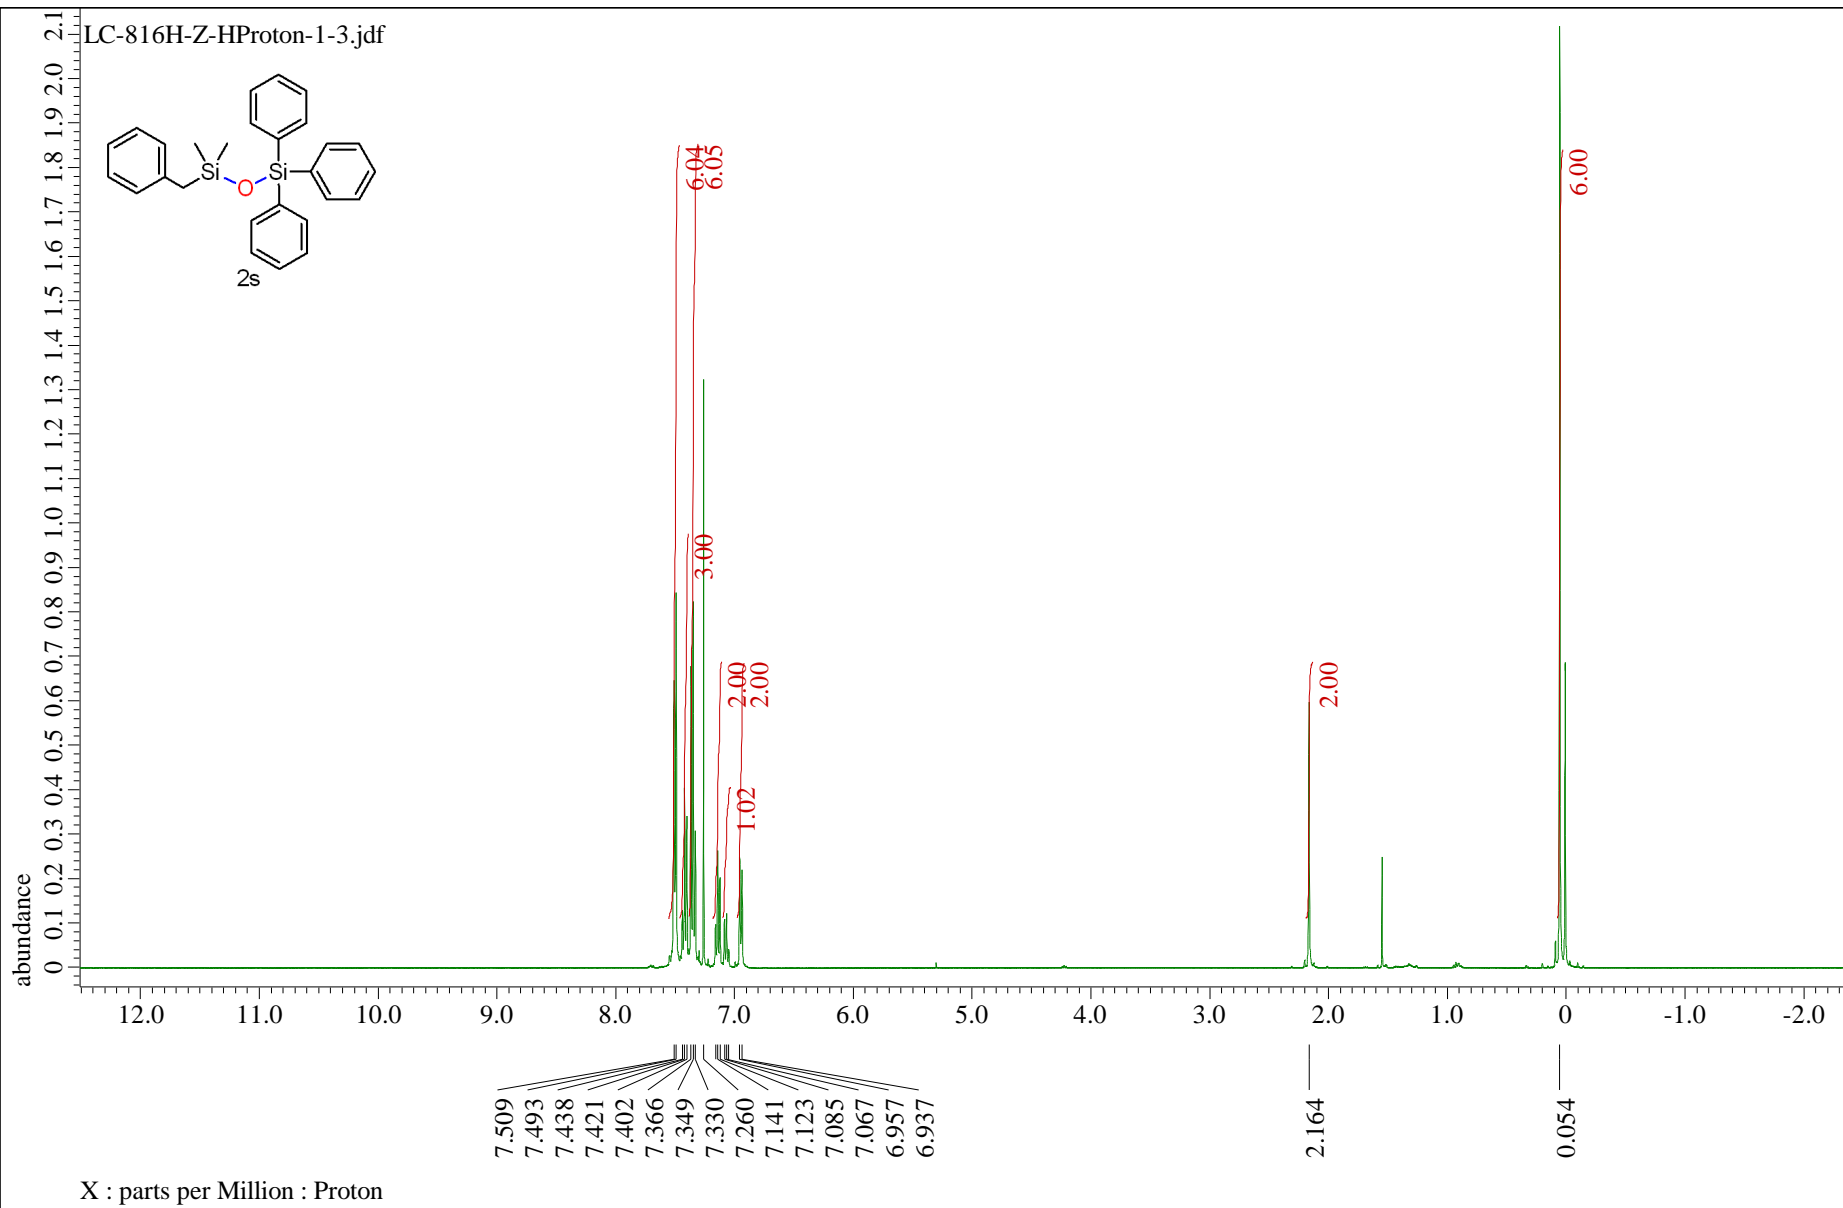

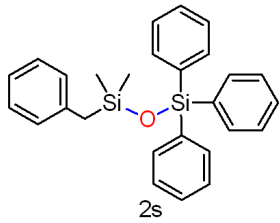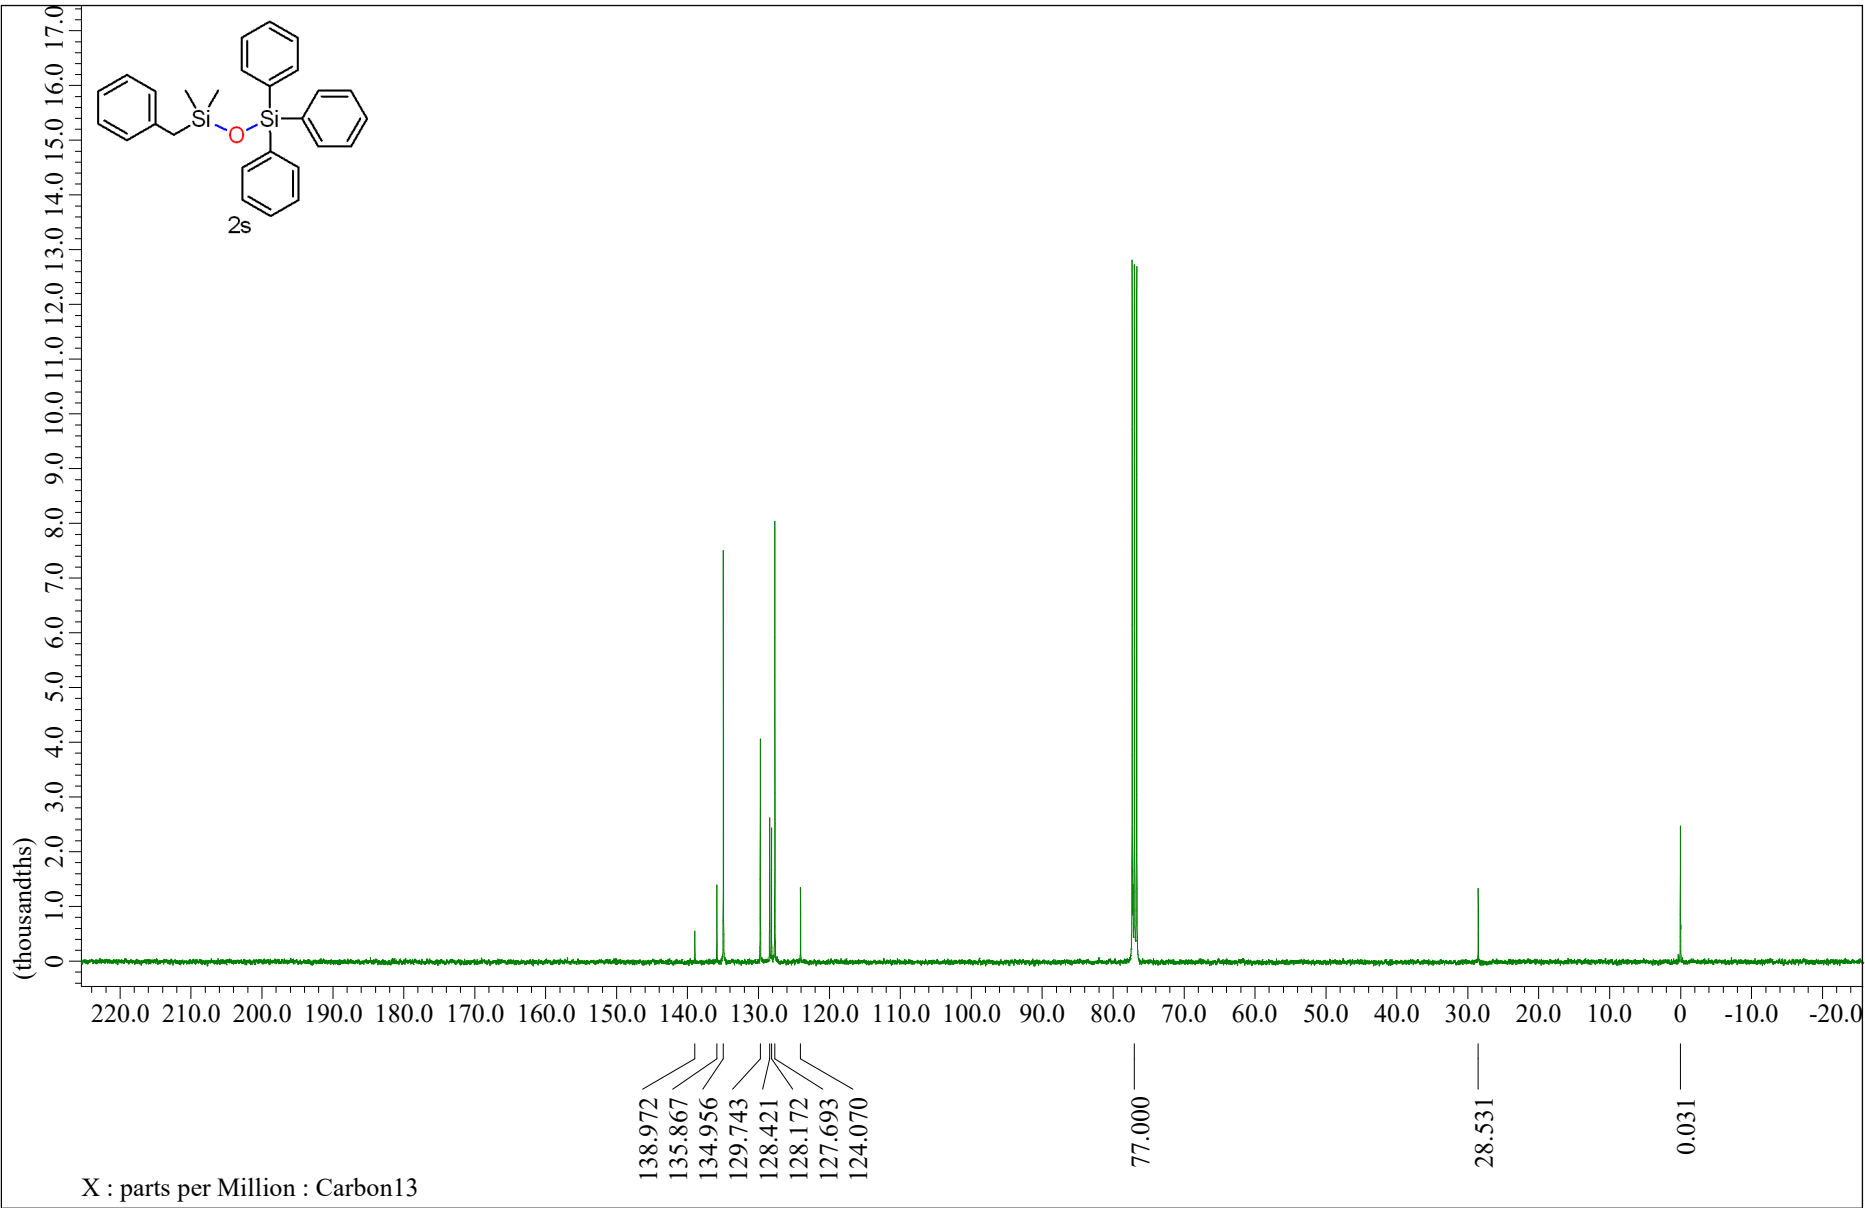

LC-819-H\_Proton-1-3.jdf

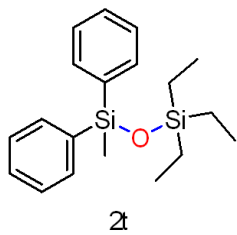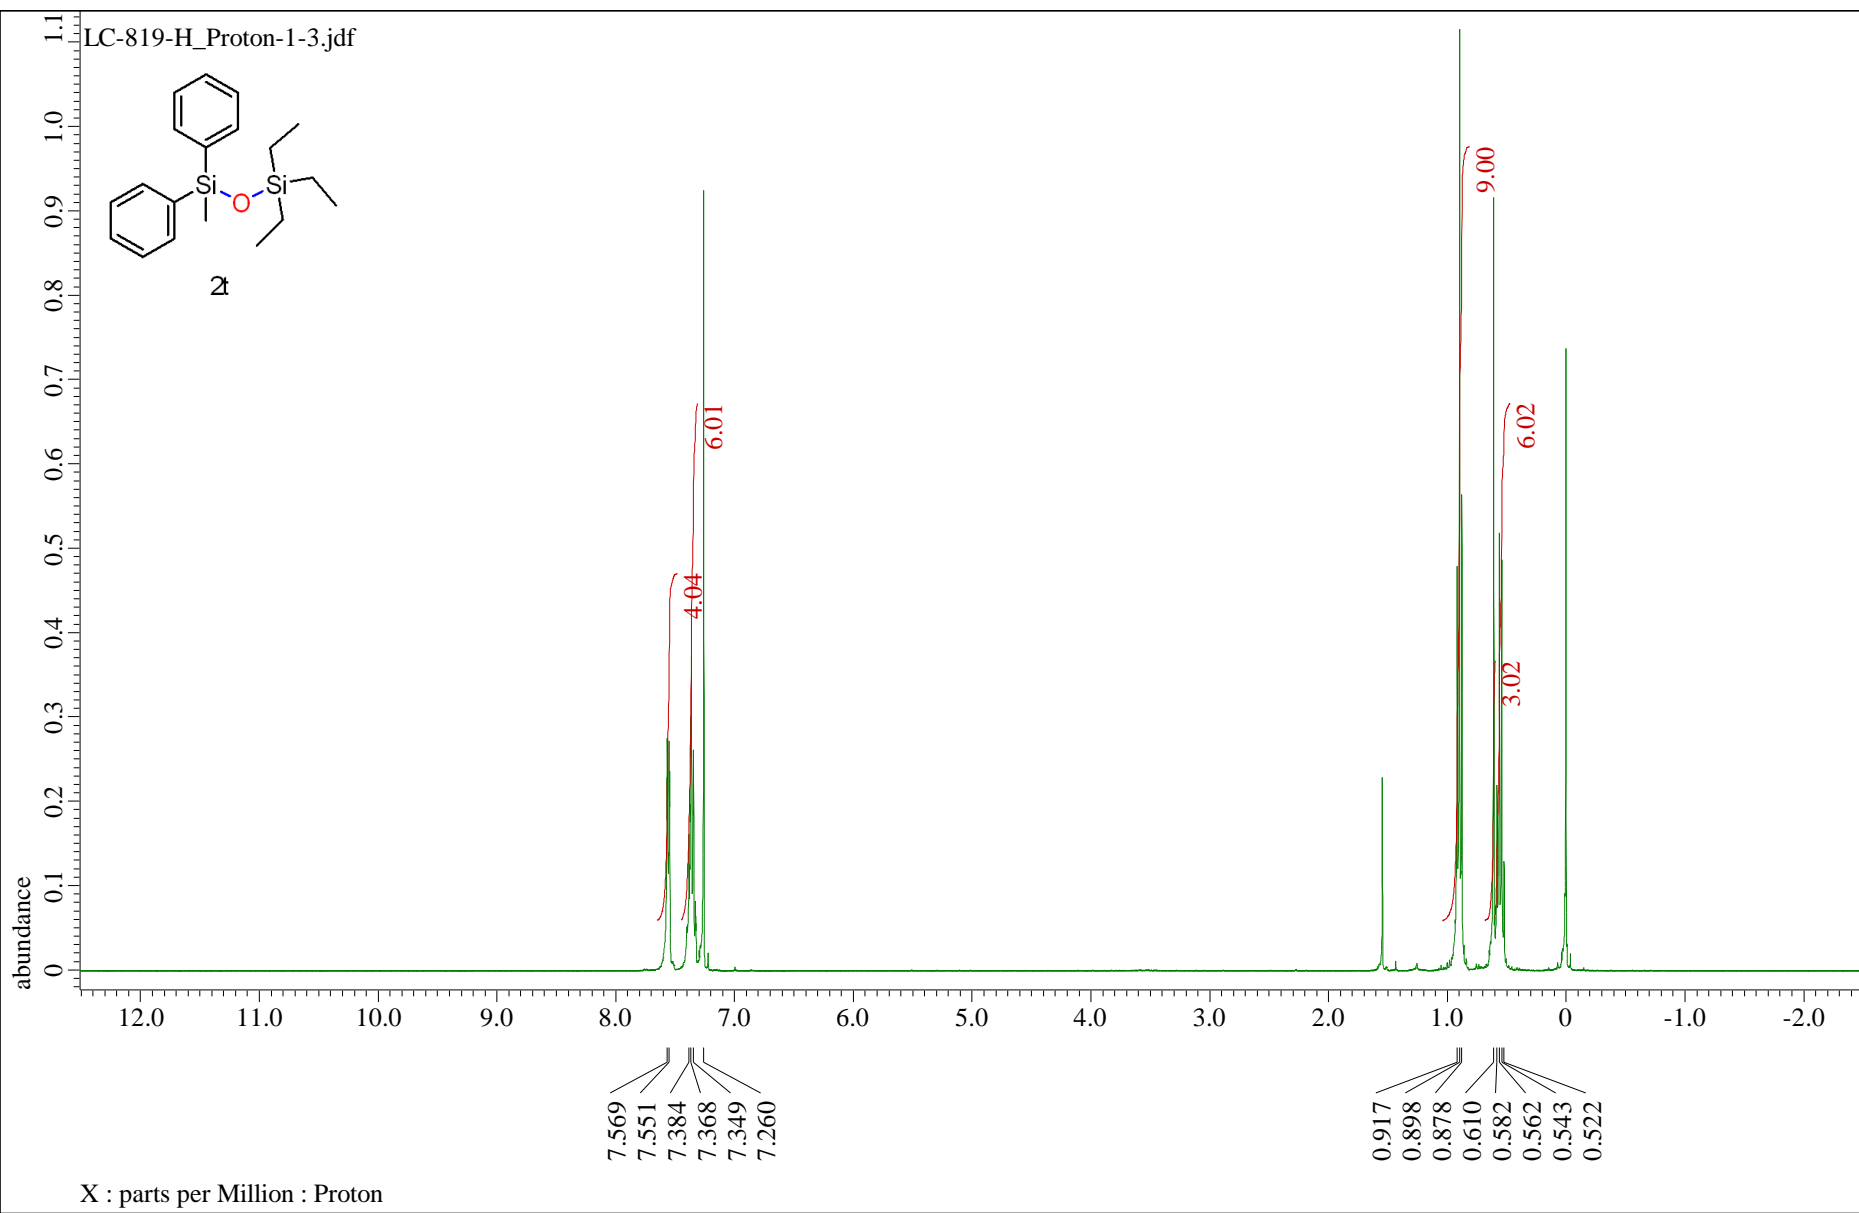

LC-819-C\_Carbon-1-3.jdf

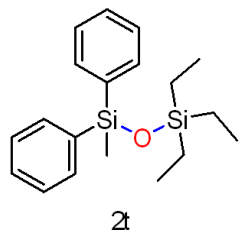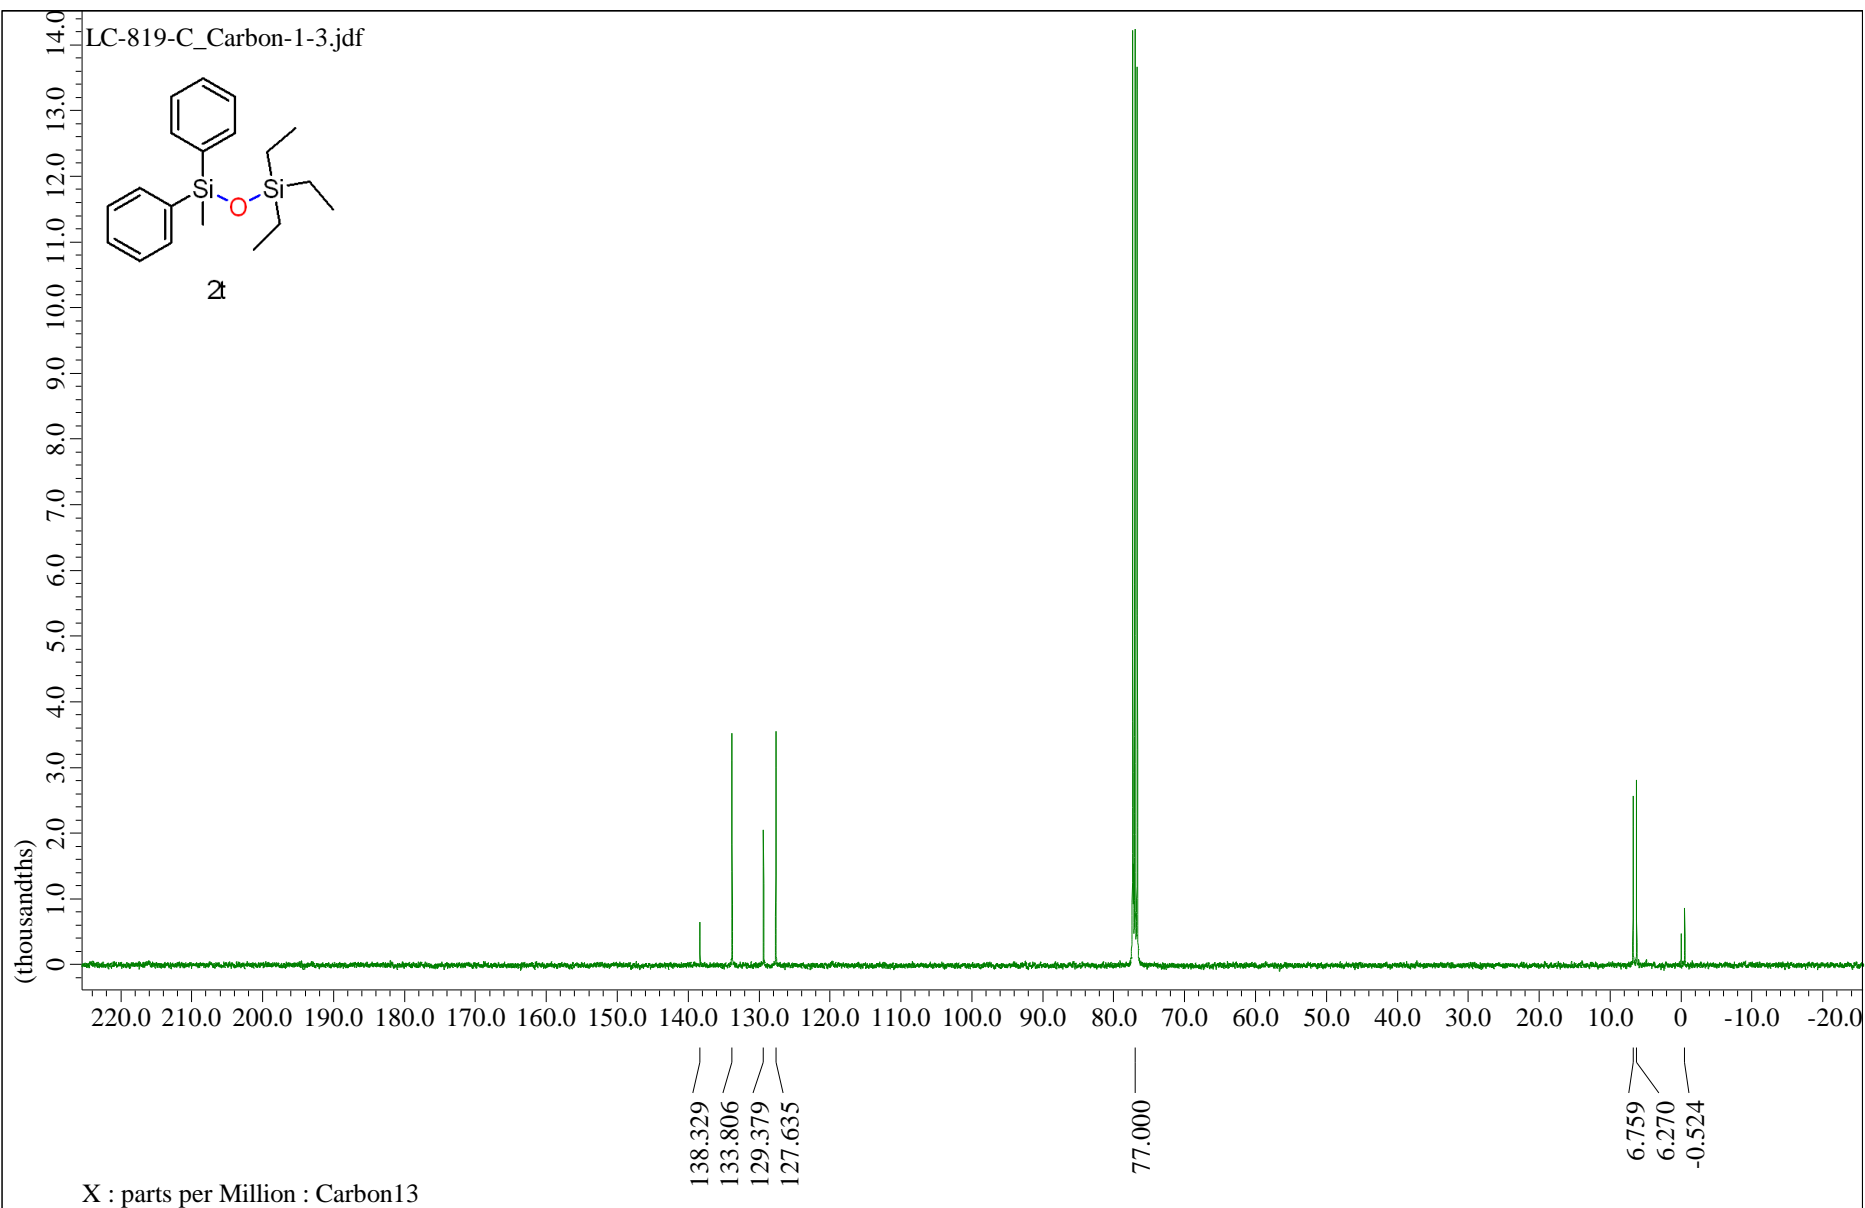



LC-827-H\_Proton-1-3.jdf

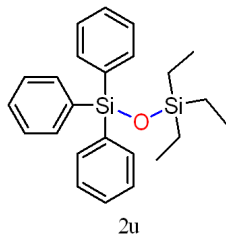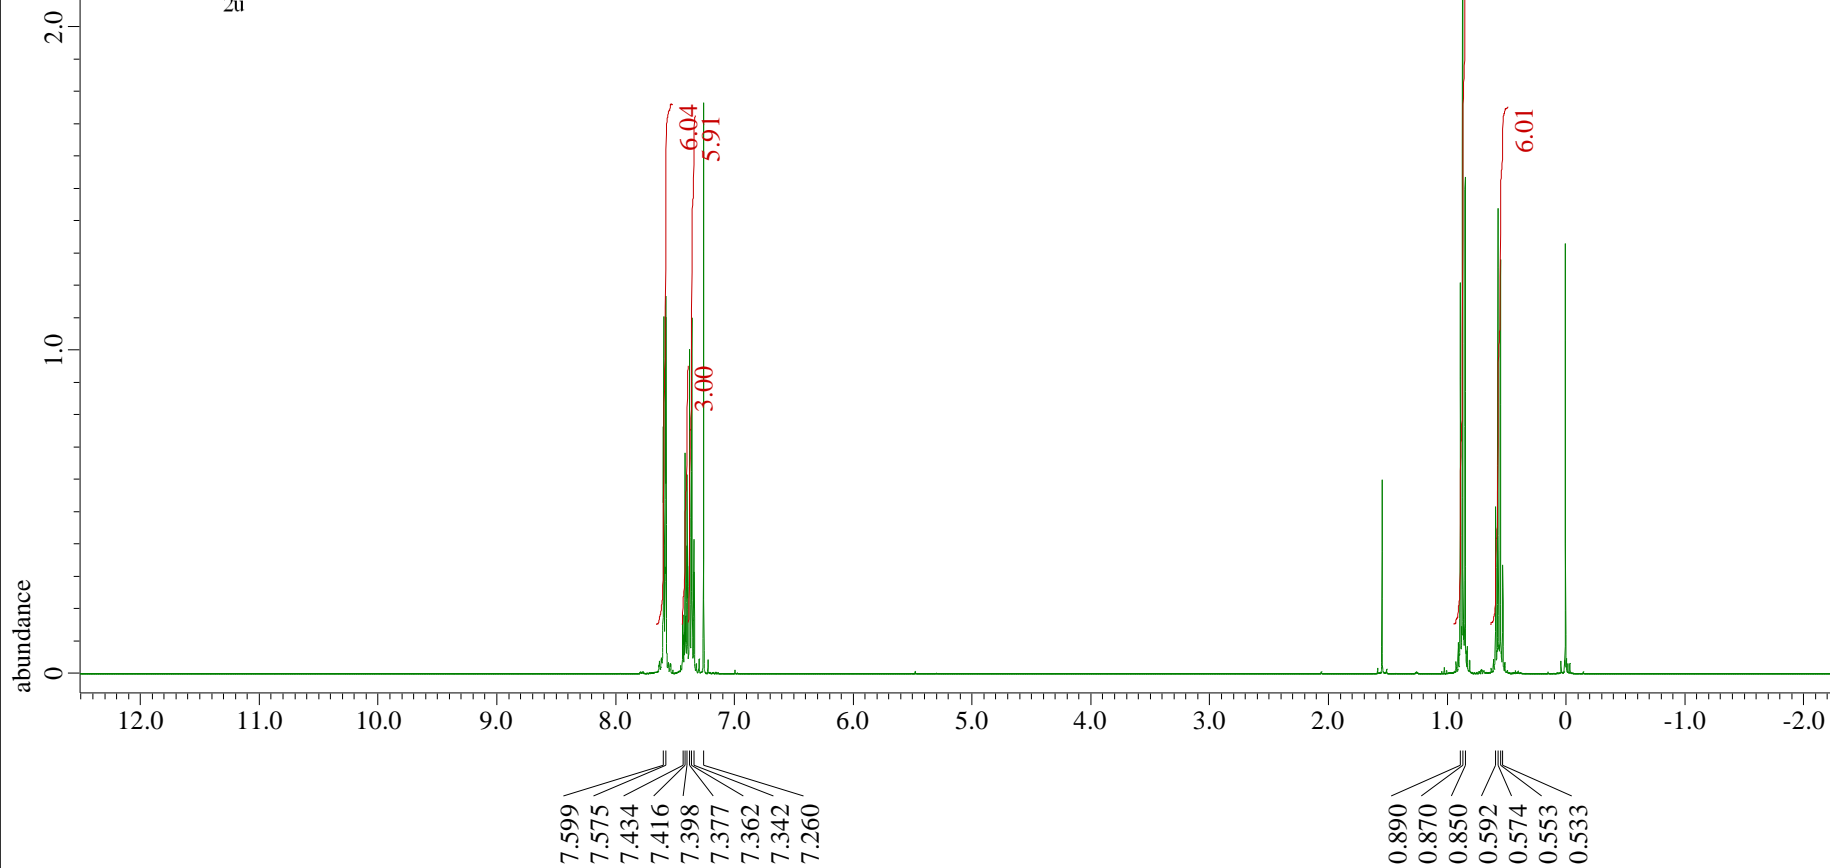

X : parts per Million : Proton

LC-827-C\_Carbon-1-3.jdf

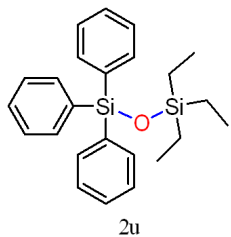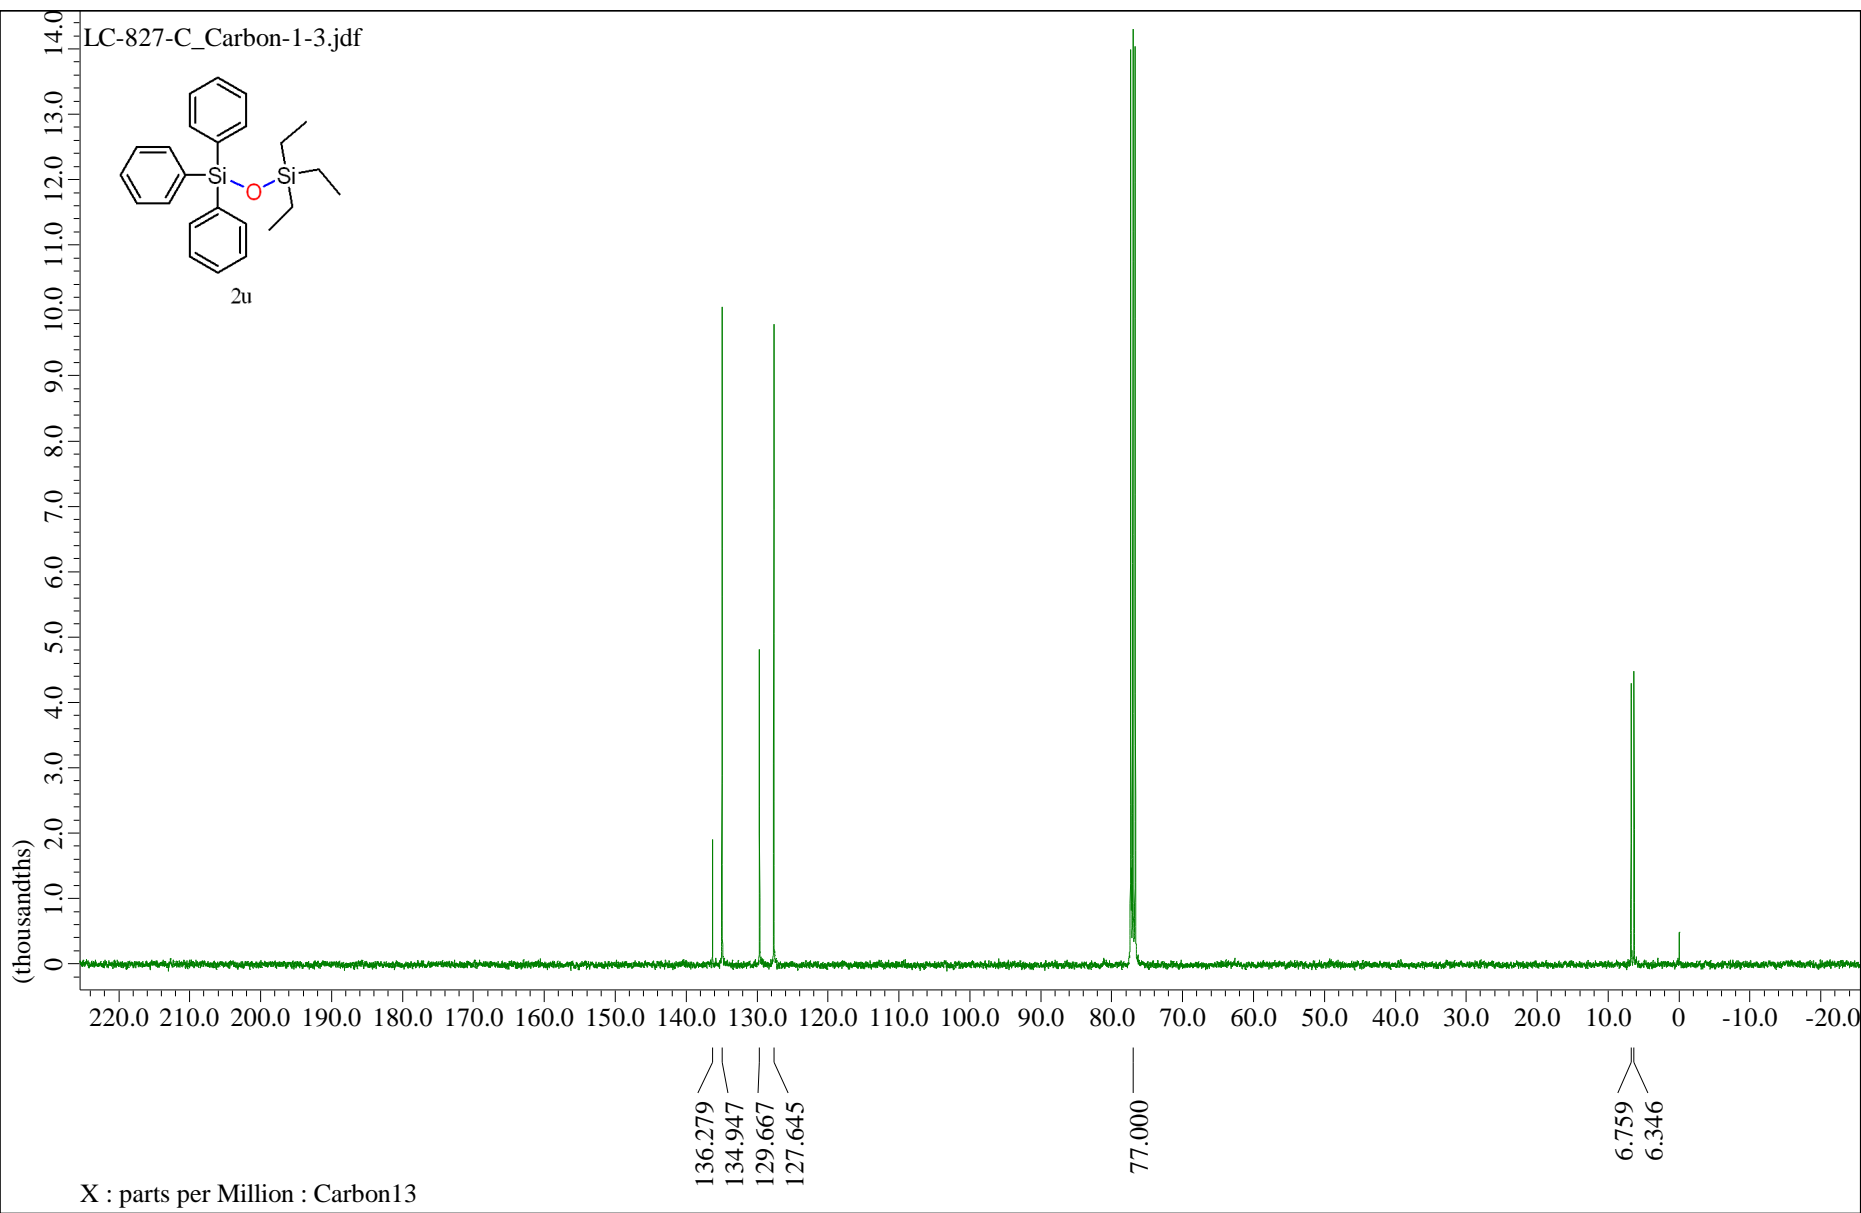

LC-828-H\_Proton-1-3.jdf

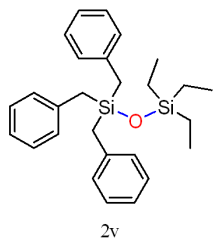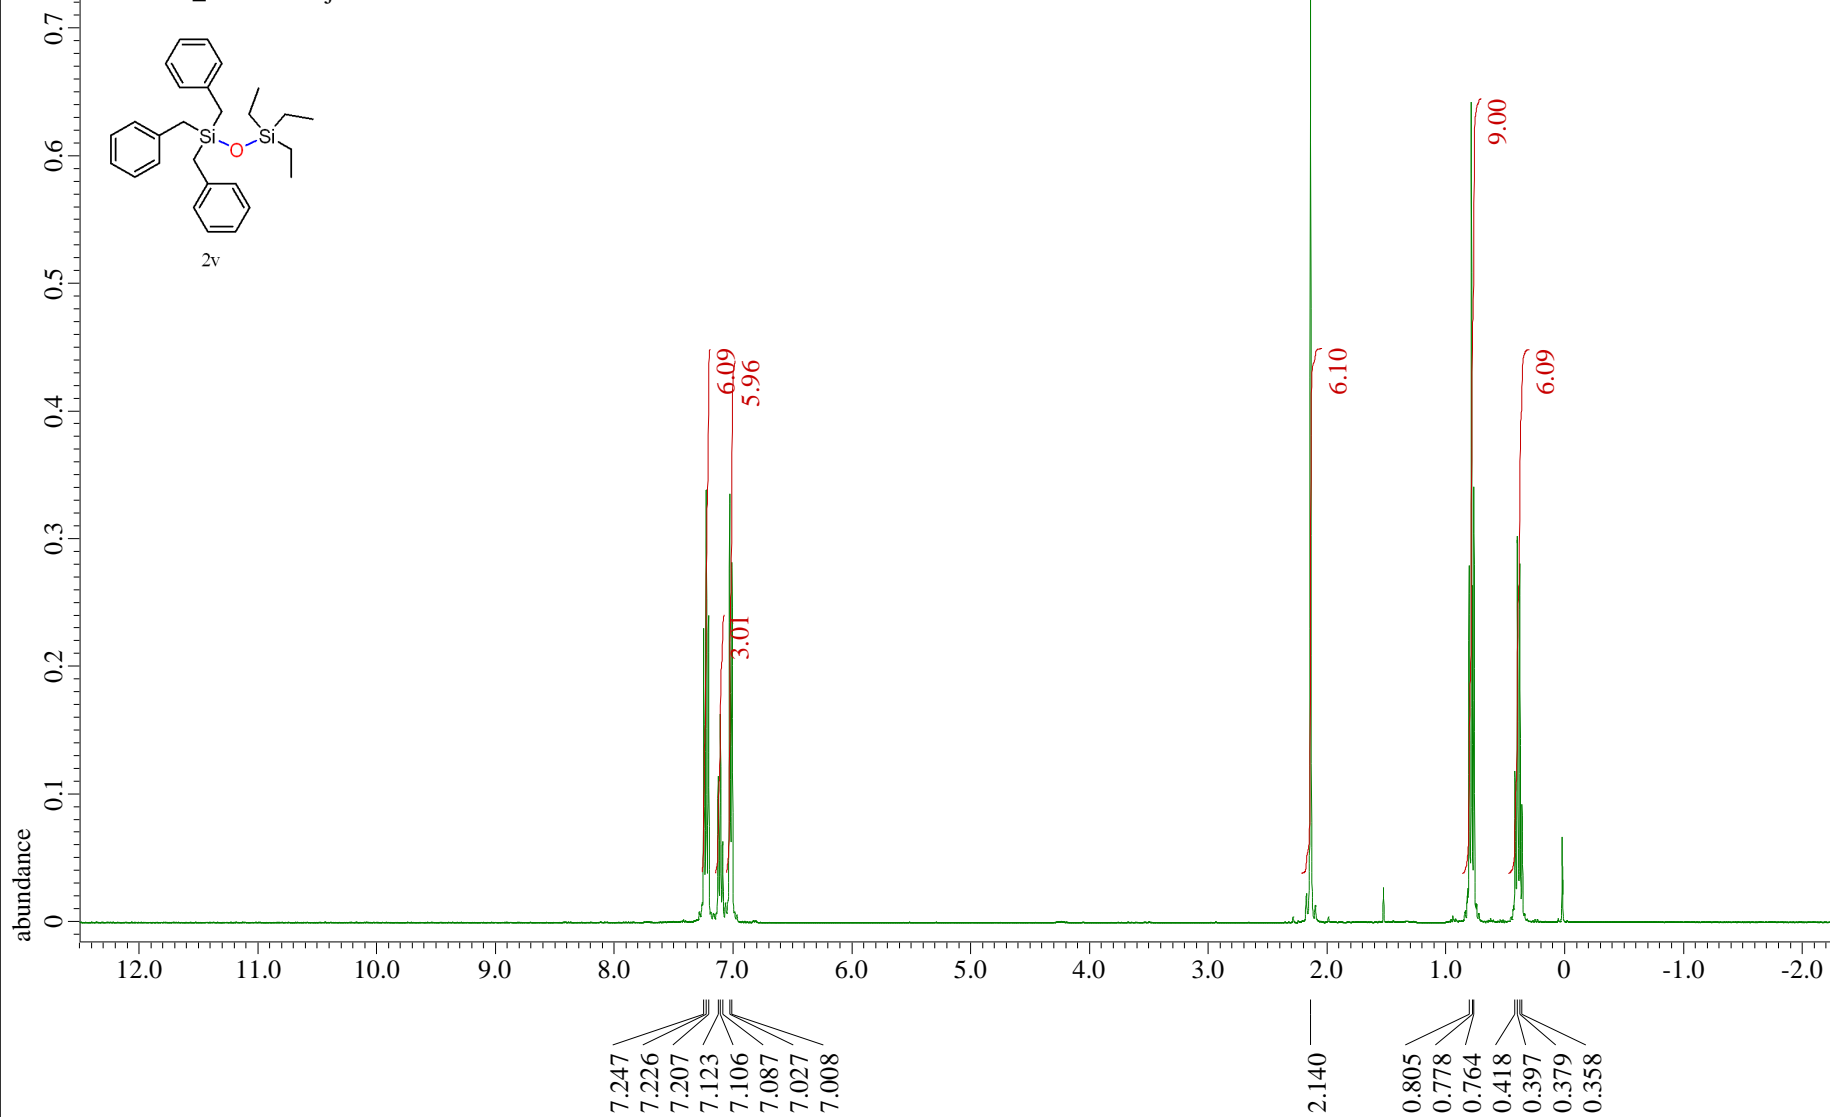

X : parts per Million : Proton





LC-824-C\_Carbon-1-5.jdf

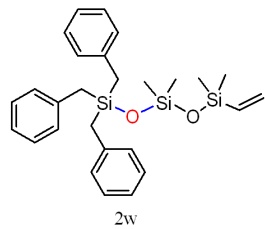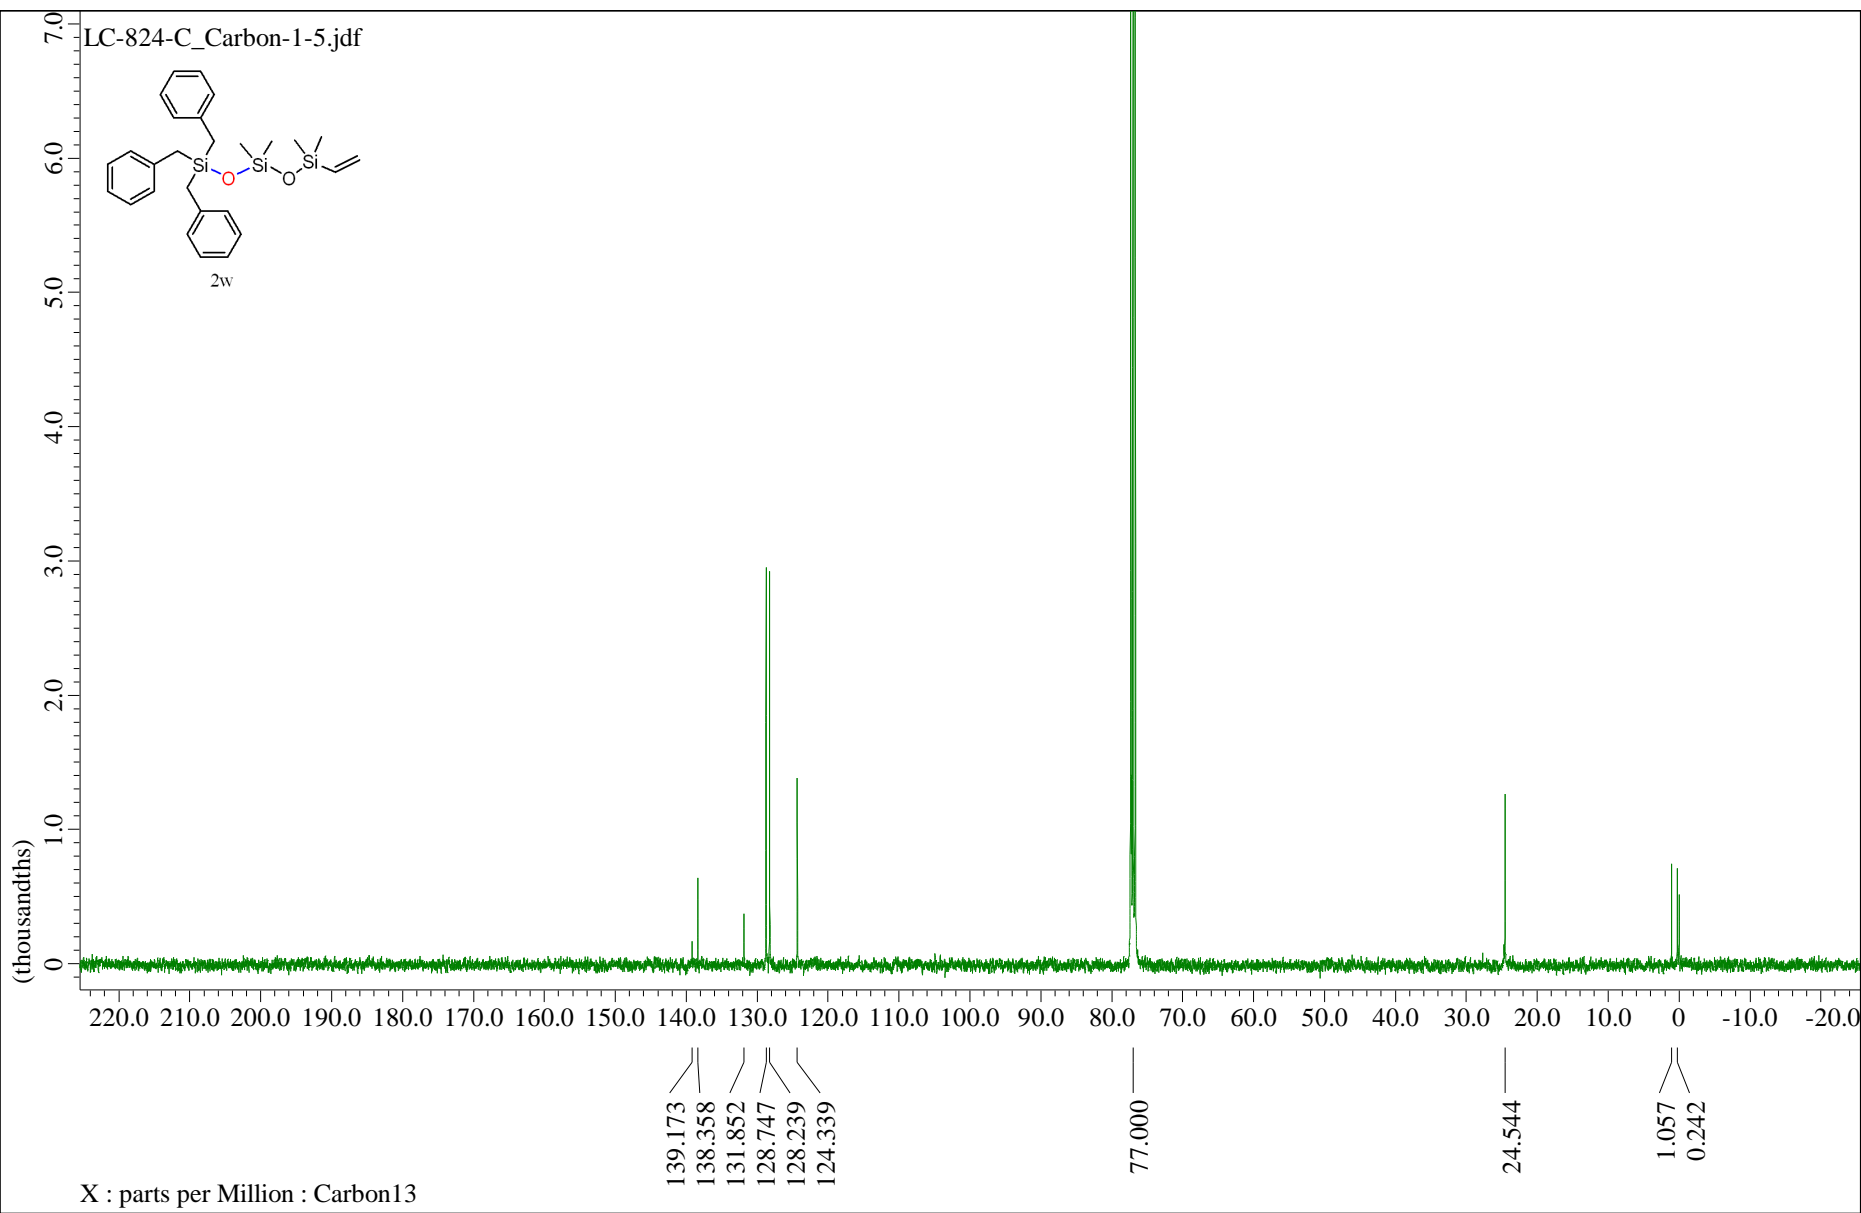

LC-825-H\_Proton-1-6.jdf

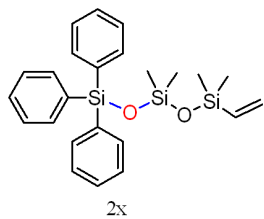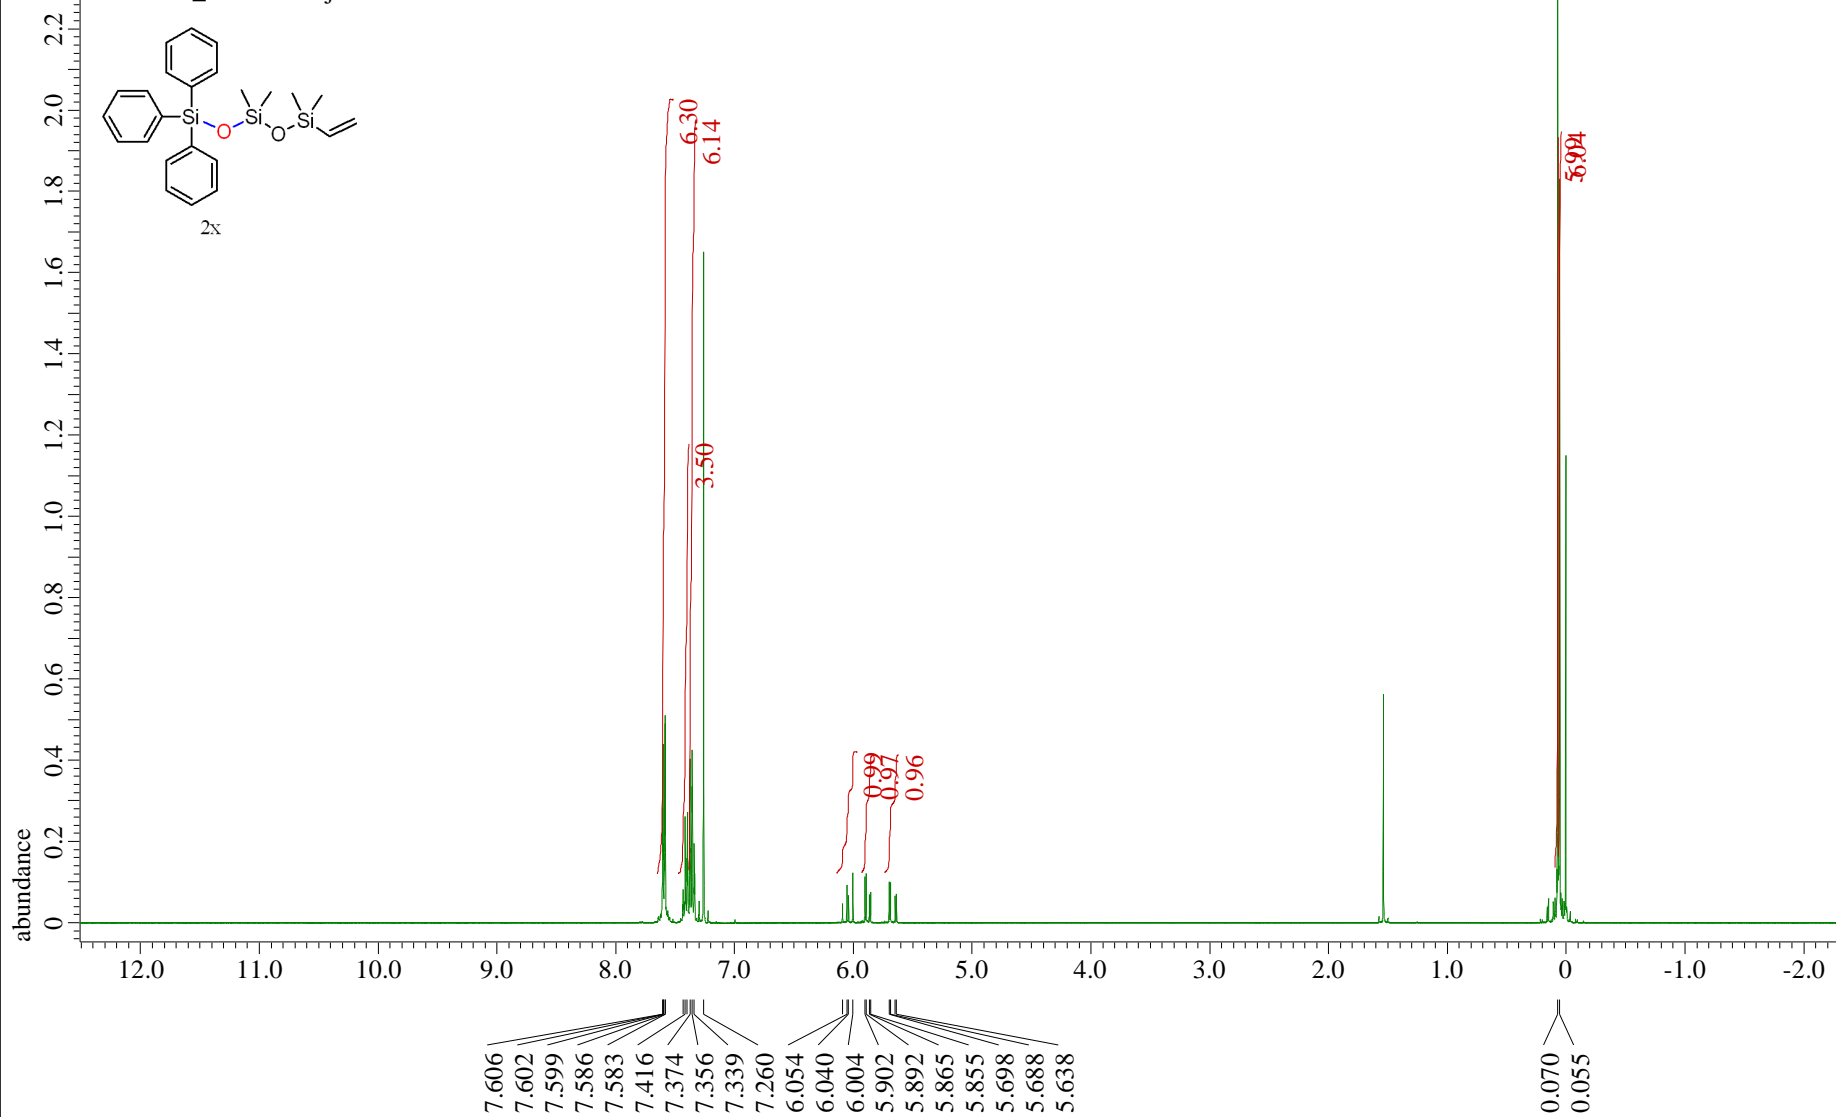

X : parts per Million : Proton

LC-825-C\_Carbon-1-3.jdf

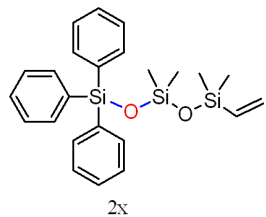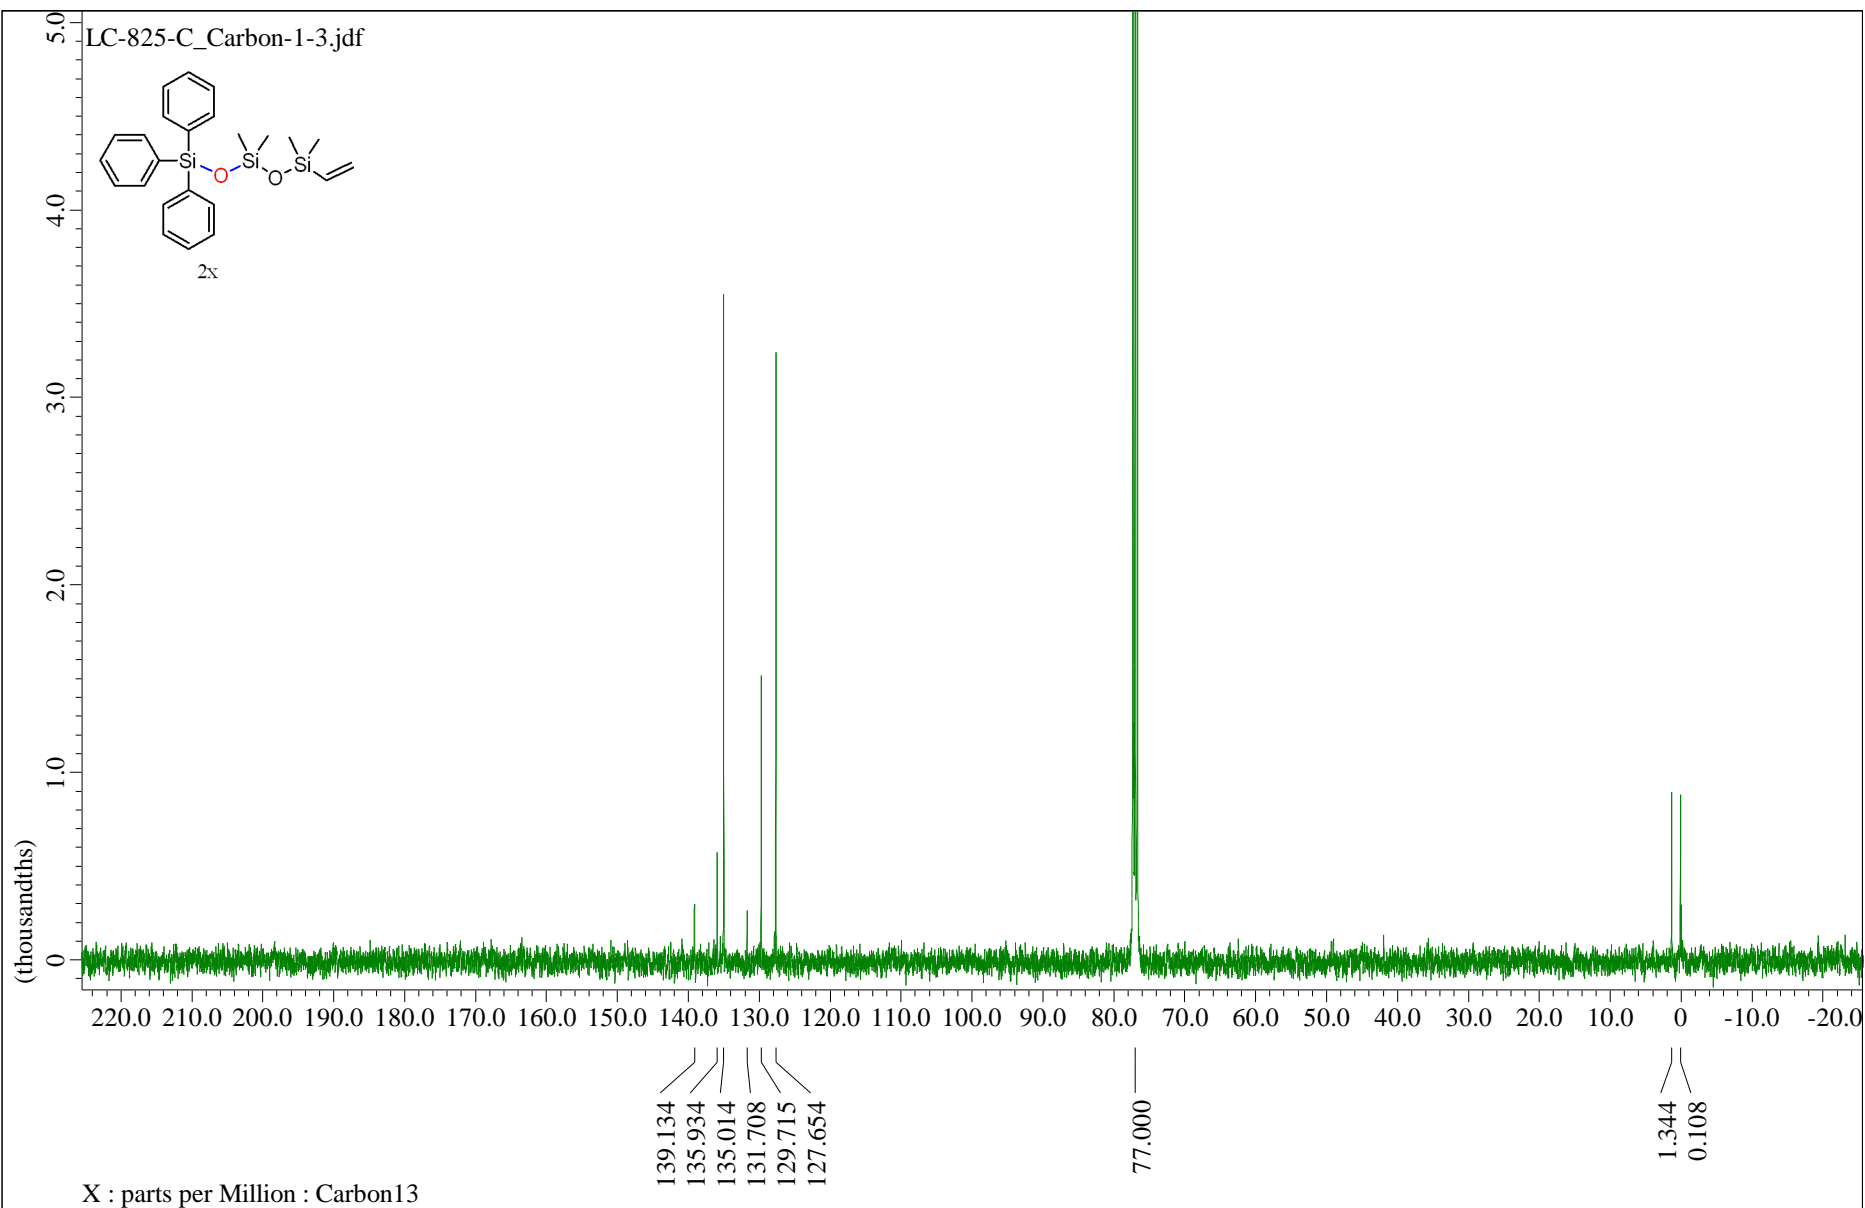

Supplement: d1nj05617d1.pdf [file d1nj05617d1.pdf]
